# Supplementary material for: Genome-wide identification and characterization of the NF-Y proteins in Zanthoxylum armatum
Source: PeerJ. 2025 Jun 26;13:e19142. doi: 10.7717/peerj.19142 (PMC12206434; doi:10.7717/peerj.19142)
Supplement: Supplemental Information 4 [file peerj-13-19142-s004.xlsx]

## Sheet: RAW DATA
name	cis	sequences	site	length	direction
ZaNF-YA1	ABRE3a	TACGTG	1002	6	-
ZaNF-YA1	TATA-box	ATATAA	34	6	+
ZaNF-YA1	TATA-box	TATA	35	4	+
ZaNF-YA1	TATA-box	TATA	112	4	+
ZaNF-YA1	TATA-box	TATTTAAA	161	8	+
ZaNF-YA1	TATA-box	ATTATA	442	6	+
ZaNF-YA1	TATA-box	TATAA	443	5	-
ZaNF-YA1	TATA-box	TATA	444	4	+
ZaNF-YA1	TATA-box	TATAA	512	5	-
ZaNF-YA1	TATA-box	TATA	513	4	+
ZaNF-YA1	TATA-box	ATTATA	850	6	+
ZaNF-YA1	TATA-box	TATAA	851	5	-
ZaNF-YA1	TATA-box	TATA	852	4	+
ZaNF-YA1	TATA-box	TACAAAA	973	7	-
ZaNF-YA1	TATA-box	ATATAT	983	6	+
ZaNF-YA1	TATA-box	TATATA	984	6	+
ZaNF-YA1	TATA-box	ATATAT	985	6	+
ZaNF-YA1	TATA-box	TATATA	986	6	+
ZaNF-YA1	TATA-box	TATA	988	4	+
ZaNF-YA1	TATA-box	ATATAT	993	6	+
ZaNF-YA1	TATA-box	TATATA	994	6	+
ZaNF-YA1	TATA-box	TATA	996	4	+
ZaNF-YA1	TATA-box	TATAAAT	1018	7	-
ZaNF-YA1	TATA-box	TATAAA	1019	6	-
ZaNF-YA1	TATA-box	TATAA	1020	5	-
ZaNF-YA1	TATA-box	TATA	1021	4	-
ZaNF-YA1	TATA-box	taTATAAAtc	1340	9	-
ZaNF-YA1	TATA-box	TATAAAA	1343	7	-
ZaNF-YA1	TATA-box	TATAAA	1344	6	-
ZaNF-YA1	TATA-box	TATAA	1345	5	-
ZaNF-YA1	TATA-box	TATA	1346	4	-
ZaNF-YA1	TATA-box	ATATAT	1391	6	-
ZaNF-YA1	TATA-box	TATA	1392	4	-
ZaNF-YA1	TATA-box	ATTATA	1401	6	+
ZaNF-YA1	TATA-box	TATAA	1402	5	-
ZaNF-YA1	TATA-box	TATA	1403	4	-
ZaNF-YA1	TATA-box	ATTATA	1427	6	+
ZaNF-YA1	TATA-box	TATAA	1428	5	-
ZaNF-YA1	TATA-box	TATA	1429	4	-
ZaNF-YA1	TATA-box	ATATAT	1437	6	-
ZaNF-YA1	TATA-box	TATATA	1438	6	-
ZaNF-YA1	TATA-box	TATA	1440	4	-
ZaNF-YA1	TATA-box	TATAAAT	1627	7	-
ZaNF-YA1	TATA-box	TATAAA	1628	6	-
ZaNF-YA1	TATA-box	TATAA	1629	5	-
ZaNF-YA1	TATA-box	TATA	1630	4	-
ZaNF-YA1	TATA-box	TATAA	1661	5	-
ZaNF-YA1	TATA-box	TATA	1662	4	-
ZaNF-YA1	TATA-box	TATA	1685	4	-
ZaNF-YA1	TATA-box	TATAAAT	1790	7	-
ZaNF-YA1	TATA-box	TATAAA	1791	6	-
ZaNF-YA1	TATA-box	TATAA	1792	5	-
ZaNF-YA1	TATA-box	TATA	1793	4	-
ZaNF-YA1	TATA-box	TATACA	1882	6	-
ZaNF-YA1	TATA-box	TATA	1884	4	-
ZaNF-YA1	TATA-box	TATA	1967	4	-
ZaNF-YA1	ABRE	ACGTG	16	5	+
ZaNF-YA1	ABRE	GACACGTGGC	89	9	+
ZaNF-YA1	ABRE	CACGTG	91	6	+
ZaNF-YA1	ABRE	ACGTG	92	5	+
ZaNF-YA1	ABRE	GACACGTGGC	256	9	-
ZaNF-YA1	ABRE	CACGTG	258	6	+
ZaNF-YA1	ABRE	ACGTG	259	5	+
ZaNF-YA1	ABRE	ACGTG	1002	5	-
ZaNF-YA1	ABRE	CACGTG	1831	6	-
ZaNF-YA1	ABRE	ACGTG	1832	5	+
ZaNF-YA1	ABRE4	CACGTA	1002	6	+
ZaNF-YA1	P-box	CCTTTTG	1993	7	-
ZaNF-YA1	W box	TTGACC	1990	6	-
ZaNF-YA1	ERE	ATTTTAAA	163	8	-
ZaNF-YA1	Unnamed__1	CGTGG	93	5	+
ZaNF-YA1	Unnamed__1	CGTGG	257	5	-
ZaNF-YA1	MYC	CATTTG	153	6	+
ZaNF-YA1	Box 4	ATTAAT	142	6	+
ZaNF-YA1	Box 4	ATTAAT	376	6	+
ZaNF-YA1	Box 4	ATTAAT	411	6	+
ZaNF-YA1	Box 4	ATTAAT	596	6	+
ZaNF-YA1	Box 4	ATTAAT	1119	6	-
ZaNF-YA1	Box 4	ATTAAT	1309	6	-
ZaNF-YA1	Myb-binding site	CAACAG	748	6	-
ZaNF-YA1	Myb-binding site	CAACAG	844	6	-
ZaNF-YA1	ARE	AAACCA	878	6	-
ZaNF-YA1	GARE-motif	TCTGTTG	747	7	+
ZaNF-YA1	CGTCA-motif	CGTCA	14	5	-
ZaNF-YA1	CGTCA-motif	CGTCA	301	5	+
ZaNF-YA1	CGTCA-motif	CGTCA	1503	5	-
ZaNF-YA1	as-1	TGACG	14	5	+
ZaNF-YA1	as-1	TGACG	301	5	-
ZaNF-YA1	as-1	TGACG	1503	5	+
ZaNF-YA1	CAAT-box	CAAT	129	4	+
ZaNF-YA1	CAAT-box	CAAT	146	4	-
ZaNF-YA1	CAAT-box	CAAAT	154	5	-
ZaNF-YA1	CAAT-box	CCAAT	360	5	+
ZaNF-YA1	CAAT-box	CAAT	361	4	+
ZaNF-YA1	CAAT-box	CAAT	447	4	-
ZaNF-YA1	CAAT-box	CAAT	574	4	+
ZaNF-YA1	CAAT-box	CCAAT	630	5	+
ZaNF-YA1	CAAT-box	CAAT	631	4	+
ZaNF-YA1	CAAT-box	CAAT	638	4	-
ZaNF-YA1	CAAT-box	CAAT	643	4	-
ZaNF-YA1	CAAT-box	CAAT	702	4	-
ZaNF-YA1	CAAT-box	CAAAT	725	5	-
ZaNF-YA1	CAAT-box	CAAT	740	4	-
ZaNF-YA1	CAAT-box	CAAT	872	4	-
ZaNF-YA1	CAAT-box	CAAT	959	4	-
ZaNF-YA1	CAAT-box	CAAAT	980	5	+
ZaNF-YA1	CAAT-box	CAAT	1369	4	+
ZaNF-YA1	CAAT-box	CAAAT	1416	5	+
ZaNF-YA1	CAAT-box	CAAT	1529	4	+
ZaNF-YA1	CAAT-box	CAAT	1547	4	-
ZaNF-YA1	CAAT-box	CCAAT	1750	5	+
ZaNF-YA1	CAAT-box	CAAT	1751	4	+
ZaNF-YA1	CAAT-box	CAAAT	1796	5	-
ZaNF-YA1	CAAT-box	CAAAT	1837	5	-
ZaNF-YA1	CAAT-box	TGCCAAC	1853	7	-
ZaNF-YA1	CAAT-box	CAAAT	1933	5	-
ZaNF-YA1	CAAT-box	CCAAT	1942	5	-
ZaNF-YA1		motif_sequence	267	4	-
ZaNF-YA1		motif_sequence	292	4	-
ZaNF-YA1		motif_sequence	809	4	-
ZaNF-YA1		motif_sequence	1233	4	+
ZaNF-YA1		motif_sequence	1385	4	+
ZaNF-YA1		motif_sequence	1550	4	-
ZaNF-YA1		motif_sequence	1638	4	+
ZaNF-YA1		motif_sequence	1866	4	+
ZaNF-YA1	Myb	TAACTG	1303	6	-
ZaNF-YA1	Myb	TAACTG	1658	6	-
ZaNF-YA1	STRE	AGGGG	924	5	+
ZaNF-YA1	STRE	AGGGG	1615	5	-
ZaNF-YA1	STRE	AGGGG	1711	5	+
ZaNF-YA1	MSA-like	TCAAACGGT	1984	9	+
ZaNF-YA1	TCA-element	CCATCTTTTT	1735	9	+
ZaNF-YA1	O2-site	GATGA(C/T)(A/G)TG(A/G)	12	8	+
ZaNF-YA1	O2-site	GTTGACGTGA	1828	9	+
ZaNF-YA1	ACE	CTAACGTATT	1926	9	+
ZaNF-YA1	G-box	CACGTC	15	6	-
ZaNF-YA1	G-box	GCCACGTGGA	89	9	+
ZaNF-YA1	G-box	CACGTG	91	6	+
ZaNF-YA1	G-box	GCCACGTGGA	256	9	-
ZaNF-YA1	G-box	CACGTG	258	6	+
ZaNF-YA1	G-box	TACGTG	1002	6	-
ZaNF-YA1	G-box	CACGTG	1831	6	-
ZaNF-YA1	TC-rich repeats	ATTCTCTAAC	177	9	+
ZaNF-YA1	MYB	CAACAG	748	6	-
ZaNF-YA1	MYB	CAACAG	844	6	-
ZaNF-YA1	MYB	CAACCA	902	6	-
ZaNF-YA1	MYB	CAACCA	1559	6	-
ZaNF-YA1	TGACG-motif	TGACG	14	5	+
ZaNF-YA1	TGACG-motif	TGACG	301	5	-
ZaNF-YA1	TGACG-motif	TGACG	1503	5	+
ZaNF-YA1	G-Box	CACGTG	91	6	+
ZaNF-YA1	G-Box	CACGTG	258	6	+
ZaNF-YA1	G-Box	CACGTG	1831	6	-
ZaNF-YA1	AT-rich element	ATAGAAATCAA	1338	10	-
ZaNF-YA1	AT-rich element	ATAGAAATCAA	1839	10	-
ZaNF-YA1	AT~TATA-box	TATATA	984	6	+
ZaNF-YA1	AT~TATA-box	TATATA	986	6	+
ZaNF-YA1	AT~TATA-box	TATATA	994	6	+
ZaNF-YA1	AT~TATA-box	TATATA	1438	6	-
ZaNF-YA1	Unnamed__4	CTCC	96	4	-
ZaNF-YA1	Unnamed__4	CTCC	809	4	-
ZaNF-YA1	Unnamed__4	CTCC	915	4	-
ZaNF-YA1	Unnamed__4	CTCC	1714	4	-
ZaNF-YA1	Unnamed__4	CTCC	1922	4	-
ZaNF-YA1	box S	AGCCACC	501	7	+
ZaNF-YA1	box S	AGCCACC	1876	7	-
ZaNF-YA10	TATA	TATAAAAT	463	8	-
ZaNF-YA10	TATA	TATAAAAT	1298	8	-
ZaNF-YA10	TCT-motif	TCTTAC	1047	6	-
ZaNF-YA10	W box	TTGACC	426	6	+
ZaNF-YA10	W box	TTGACC	485	6	-
ZaNF-YA10	TATA-box	ATATAT	39	6	+
ZaNF-YA10	TATA-box	TATA	40	4	+
ZaNF-YA10	TATA-box	ATTATA	50	6	+
ZaNF-YA10	TATA-box	TATAA	51	5	-
ZaNF-YA10	TATA-box	TATA	52	4	+
ZaNF-YA10	TATA-box	TATA	94	4	+
ZaNF-YA10	TATA-box	TACAAAA	146	7	-
ZaNF-YA10	TATA-box	ATATAA	175	6	+
ZaNF-YA10	TATA-box	TATA	176	4	+
ZaNF-YA10	TATA-box	TATA	273	4	+
ZaNF-YA10	TATA-box	ATTATA	337	6	+
ZaNF-YA10	TATA-box	TATATAA	338	7	-
ZaNF-YA10	TATA-box	TATATA	339	6	+
ZaNF-YA10	TATA-box	ATATAA	340	6	+
ZaNF-YA10	TATA-box	TATA	341	4	+
ZaNF-YA10	TATA-box	TATA	347	4	+
ZaNF-YA10	TATA-box	TATA	386	4	+
ZaNF-YA10	TATA-box	TATA	406	4	+
ZaNF-YA10	TATA-box	TATAAAA	464	7	-
ZaNF-YA10	TATA-box	TATAAA	465	6	-
ZaNF-YA10	TATA-box	TATAA	466	5	-
ZaNF-YA10	TATA-box	TATA	467	4	+
ZaNF-YA10	TATA-box	ATATAA	472	6	+
ZaNF-YA10	TATA-box	TATA	473	4	+
ZaNF-YA10	TATA-box	TATAAAT	529	7	-
ZaNF-YA10	TATA-box	TATAAA	530	6	-
ZaNF-YA10	TATA-box	TATAA	531	5	-
ZaNF-YA10	TATA-box	TATA	532	4	+
ZaNF-YA10	TATA-box	taTATAAAtc	647	9	-
ZaNF-YA10	TATA-box	TATAAAT	648	7	-
ZaNF-YA10	TATA-box	TATAAA	649	6	-
ZaNF-YA10	TATA-box	TATATAA	650	7	-
ZaNF-YA10	TATA-box	TATATA	651	6	+
ZaNF-YA10	TATA-box	ATATAT	652	6	+
ZaNF-YA10	TATA-box	TATA	653	4	+
ZaNF-YA10	TATA-box	TATATAA	674	7	-
ZaNF-YA10	TATA-box	TATATA	675	6	+
ZaNF-YA10	TATA-box	ATATAA	676	6	+
ZaNF-YA10	TATA-box	TATA	677	4	+
ZaNF-YA10	TATA-box	TATAA	730	5	-
ZaNF-YA10	TATA-box	TATA	731	4	+
ZaNF-YA10	TATA-box	ATTATA	790	6	+
ZaNF-YA10	TATA-box	TATAA	791	5	-
ZaNF-YA10	TATA-box	TATA	792	4	+
ZaNF-YA10	TATA-box	ATATAT	810	6	+
ZaNF-YA10	TATA-box	TATA	811	4	+
ZaNF-YA10	TATA-box	TATAAAT	825	7	-
ZaNF-YA10	TATA-box	TATAAA	826	6	-
ZaNF-YA10	TATA-box	TATAA	827	5	-
ZaNF-YA10	TATA-box	TATA	828	4	+
ZaNF-YA10	TATA-box	TATATAA	954	7	-
ZaNF-YA10	TATA-box	TATATA	955	6	+
ZaNF-YA10	TATA-box	ATATAT	956	6	+
ZaNF-YA10	TATA-box	TATA	957	4	+
ZaNF-YA10	TATA-box	ATTATA	996	6	+
ZaNF-YA10	TATA-box	TATATAA	997	7	-
ZaNF-YA10	TATA-box	TATATA	998	6	+
ZaNF-YA10	TATA-box	ATATAT	999	6	-
ZaNF-YA10	TATA-box	TATA	1000	4	-
ZaNF-YA10	TATA-box	TATAAAT	1108	7	-
ZaNF-YA10	TATA-box	TATAAA	1109	6	-
ZaNF-YA10	TATA-box	TATAA	1110	5	-
ZaNF-YA10	TATA-box	TATA	1111	4	-
ZaNF-YA10	TATA-box	TATAAAA	1117	7	-
ZaNF-YA10	TATA-box	TATAAA	1118	6	-
ZaNF-YA10	TATA-box	TATATAA	1119	7	-
ZaNF-YA10	TATA-box	TATATA	1120	6	-
ZaNF-YA10	TATA-box	TATA	1122	4	-
ZaNF-YA10	TATA-box	ATATAA	1140	6	+
ZaNF-YA10	TATA-box	TATA	1141	4	-
ZaNF-YA10	TATA-box	TATAAAA	1299	7	-
ZaNF-YA10	TATA-box	TATAAA	1300	6	-
ZaNF-YA10	TATA-box	TATAA	1301	5	-
ZaNF-YA10	TATA-box	TATA	1302	4	-
ZaNF-YA10	TATA-box	TACAAAA	1322	7	+
ZaNF-YA10	TATA-box	TAAAGATT	1506	8	-
ZaNF-YA10	TATA-box	TATA	1543	4	-
ZaNF-YA10	TATA-box	TAAAGATT	1855	8	-
ZaNF-YA10	LTR	CCGAAA	1529	6	-
ZaNF-YA10	chs-CMA1a	TTACTTAA	1043	8	-
ZaNF-YA10	TCCC-motif	TCTCCCT	245	7	+
ZaNF-YA10	MYB-like sequence	TAACCA	1345	6	-
ZaNF-YA10	MYB-like sequence	TAACCA	1712	6	-
ZaNF-YA10	as-1	TGACG	949	5	+
ZaNF-YA10	as-1	TGACG	1990	5	+
ZaNF-YA10	CGTCA-motif	CGTCA	949	5	-
ZaNF-YA10	CGTCA-motif	CGTCA	1990	5	-
ZaNF-YA10	GT1-motif	GGTTAAT	1346	7	+
ZaNF-YA10	GT1-motif	GGTTAA	1713	6	+
ZaNF-YA10	ARE	AAACCA	571	6	+
ZaNF-YA10	Box 4	ATTAAT	20	6	+
ZaNF-YA10	Box 4	ATTAAT	252	6	+
ZaNF-YA10	Box 4	ATTAAT	546	6	+
ZaNF-YA10	Box 4	ATTAAT	747	6	+
ZaNF-YA10	Box 4	ATTAAT	858	6	+
ZaNF-YA10	MYC	CATTTG	663	6	-
ZaNF-YA10	TCA	TCATCTTCAT	1208	9	-
ZaNF-YA10	TCA	TCATCTTCAT	1816	9	-
ZaNF-YA10	TC-rich repeats	ATTCTCTAAC	1570	9	+
ZaNF-YA10	TCA-element	CCATCTTTTT	1600	9	+
ZaNF-YA10	Myc	TCTCTTA	513	7	-
ZaNF-YA10	STRE	AGGGG	419	5	-
ZaNF-YA10	STRE	AGGGG	1421	5	-
ZaNF-YA10	Myb	CAACTG	520	6	-
ZaNF-YA10	Myb	TAACTG	1483	6	+
ZaNF-YA10	Myb	CAACTG	1629	6	+
ZaNF-YA10		motif_sequence	5	4	-
ZaNF-YA10		motif_sequence	212	4	+
ZaNF-YA10		motif_sequence	244	4	+
ZaNF-YA10		motif_sequence	395	4	-
ZaNF-YA10		motif_sequence	412	4	+
ZaNF-YA10		motif_sequence	443	4	+
ZaNF-YA10		motif_sequence	587	4	-
ZaNF-YA10		motif_sequence	980	4	+
ZaNF-YA10		motif_sequence	1403	4	+
ZaNF-YA10		motif_sequence	1518	4	+
ZaNF-YA10		motif_sequence	1537	4	+
ZaNF-YA10	CAAT-box	CAAT	12	4	-
ZaNF-YA10	CAAT-box	CCAAT	34	5	-
ZaNF-YA10	CAAT-box	CAAAT	110	5	+
ZaNF-YA10	CAAT-box	CAAAT	230	5	+
ZaNF-YA10	CAAT-box	CAAT	233	4	-
ZaNF-YA10	CAAT-box	CAAAT	262	5	-
ZaNF-YA10	CAAT-box	CAAT	437	4	-
ZaNF-YA10	CAAT-box	CAAAT	460	5	+
ZaNF-YA10	CAAT-box	CAAAT	491	5	+
ZaNF-YA10	CAAT-box	CAAT	527	4	+
ZaNF-YA10	CAAT-box	CCAAT	591	5	-
ZaNF-YA10	CAAT-box	CAAT	601	4	+
ZaNF-YA10	CAAT-box	CAAAT	663	5	+
ZaNF-YA10	CAAT-box	CAAAT	683	5	-
ZaNF-YA10	CAAT-box	CCAAT	696	5	+
ZaNF-YA10	CAAT-box	CAAT	697	4	+
ZaNF-YA10	CAAT-box	CAAT	758	4	+
ZaNF-YA10	CAAT-box	CAAT	837	4	+
ZaNF-YA10	CAAT-box	CAAT	900	4	+
ZaNF-YA10	CAAT-box	CAAT	921	4	-
ZaNF-YA10	CAAT-box	CAAT	960	4	-
ZaNF-YA10	CAAT-box	CAAT	1025	4	+
ZaNF-YA10	CAAT-box	CAAT	1039	4	-
ZaNF-YA10	CAAT-box	CAAT	1148	4	-
ZaNF-YA10	CAAT-box	CAAAT	1283	5	+
ZaNF-YA10	CAAT-box	CAAAT	1679	5	-
ZaNF-YA10	CAAT-box	CAAT	1834	4	-
ZaNF-YA10	CAAT-box	CAAT	1920	4	-
ZaNF-YA10	CAAT-box	CAAT	1970	4	-
ZaNF-YA10	CAAT-box	CAAAT	1977	5	-
ZaNF-YA10	Unnamed__4	CTCC	98	4	+
ZaNF-YA10	Unnamed__4	CTCC	132	4	-
ZaNF-YA10	Unnamed__4	CTCC	246	4	+
ZaNF-YA10	Unnamed__4	CTCC	278	4	+
ZaNF-YA10	Unnamed__4	CTCC	417	4	+
ZaNF-YA10	Unnamed__4	CTCC	587	4	-
ZaNF-YA10	Unnamed__4	CTCC	1200	4	-
ZaNF-YA10	Unnamed__4	CTCC	1405	4	+
ZaNF-YA10	Unnamed__4	CTCC	1463	4	+
ZaNF-YA10	AE-box	AGAAACAA	1583	8	-
ZaNF-YA10	AE-box	AGAAACTT	1759	8	-
ZaNF-YA10	AT-rich element	ATAGAAATCAA	1681	10	-
ZaNF-YA10	AT~TATA-box	TATATA	339	6	+
ZaNF-YA10	AT~TATA-box	TATATAAA	649	8	-
ZaNF-YA10	AT~TATA-box	TATATA	651	6	+
ZaNF-YA10	AT~TATA-box	TATATA	675	6	+
ZaNF-YA10	AT~TATA-box	TATATA	955	6	+
ZaNF-YA10	AT~TATA-box	TATATA	998	6	+
ZaNF-YA10	AT~TATA-box	TATATAAA	1118	8	-
ZaNF-YA10	AT~TATA-box	TATATA	1120	6	-
ZaNF-YA10	TGACG-motif	TGACG	949	5	+
ZaNF-YA10	TGACG-motif	TGACG	1990	5	+
ZaNF-YA10	CTAG-motif	ACTAGCAGAA	122	9	-
ZaNF-YA10	MYB	CAACCA	1222	6	+
ZaNF-YA10	MYB	TAACCA	1345	6	-
ZaNF-YA10	MYB	CAACCA	1637	6	-
ZaNF-YA10	MYB	TAACCA	1712	6	-
ZaNF-YA10	MBS	CAACTG	520	6	-
ZaNF-YA10	MBS	CAACTG	1629	6	+
ZaNF-YA11	TGACG-motif	TGACG	488	5	-
ZaNF-YA11	G-Box	CACGTT	821	6	-
ZaNF-YA11	AT-rich element	ATAGAAATCAA	1762	10	-
ZaNF-YA11	AE-box	AGAAACAA	1008	8	-
ZaNF-YA11	AE-box	AGAAACAA	1431	8	-
ZaNF-YA11	Unnamed__4	CTCC	81	4	-
ZaNF-YA11	Unnamed__4	CTCC	229	4	-
ZaNF-YA11	Unnamed__4	CTCC	515	4	-
ZaNF-YA11	Unnamed__4	CTCC	1108	4	-
ZaNF-YA11	Unnamed__4	CTCC	1946	4	+
ZaNF-YA11	MBS	CAACTG	495	6	-
ZaNF-YA11	MYB	CAACCA	1876	6	-
ZaNF-YA11	CTAG-motif	ACTAGCAGAA	720	9	+
ZaNF-YA11	G-box	CACGTC	486	6	+
ZaNF-YA11	TC-rich repeats	ATTCTCTAAC	547	9	-
ZaNF-YA11		motif_sequence	367	4	-
ZaNF-YA11		motif_sequence	585	4	+
ZaNF-YA11		motif_sequence	857	4	-
ZaNF-YA11		motif_sequence	974	4	-
ZaNF-YA11		motif_sequence	1452	4	+
ZaNF-YA11		motif_sequence	1949	4	+
ZaNF-YA11		motif_sequence	1961	4	-
ZaNF-YA11	CAAT-box	CAAT	239	4	-
ZaNF-YA11	CAAT-box	CAAAT	253	5	+
ZaNF-YA11	CAAT-box	CAAAT	307	5	-
ZaNF-YA11	CAAT-box	CAAAT	314	5	+
ZaNF-YA11	CAAT-box	CAAT	353	4	+
ZaNF-YA11	CAAT-box	CAAAT	389	5	-
ZaNF-YA11	CAAT-box	CAAT	633	4	-
ZaNF-YA11	CAAT-box	CAAT	709	4	-
ZaNF-YA11	CAAT-box	CAAT	804	4	-
ZaNF-YA11	CAAT-box	CAAAT	987	5	-
ZaNF-YA11	CAAT-box	CAAT	1007	4	-
ZaNF-YA11	CAAT-box	CAAAT	1026	5	+
ZaNF-YA11	CAAT-box	CAAT	1184	4	-
ZaNF-YA11	CAAT-box	CAAAT	1365	5	+
ZaNF-YA11	CAAT-box	CAAAT	1368	5	-
ZaNF-YA11	CAAT-box	CAAAT	1506	5	-
ZaNF-YA11	CAAT-box	CAAT	1525	4	+
ZaNF-YA11	CAAT-box	CAAT	1548	4	-
ZaNF-YA11	CAAT-box	CCAAT	1596	5	-
ZaNF-YA11	CAAT-box	CAAT	1611	4	-
ZaNF-YA11	CAAT-box	CAAT	1671	4	-
ZaNF-YA11	CAAT-box	CAAT	1677	4	-
ZaNF-YA11	CAAT-box	CAAT	1758	4	+
ZaNF-YA11	CAAT-box	CAAAT	1760	5	-
ZaNF-YA11	CAAT-box	CAAAT	1789	5	+
ZaNF-YA11	CAAT-box	CAAAT	1792	5	-
ZaNF-YA11	CAAT-box	CAAT	1855	4	-
ZaNF-YA11	CAAT-box	CAAT	1965	4	-
ZaNF-YA11	CAAT-box	CAAT	1970	4	-
ZaNF-YA11	Myb	CAACTG	495	6	-
ZaNF-YA11	GATA-motif	AAGATAAGATT	376	11	+
ZaNF-YA11	Myc	TCTCTTA	1625	7	+
ZaNF-YA11	STRE	AGGGG	77	5	+
ZaNF-YA11	STRE	AGGGG	1778	5	-
ZaNF-YA11	as-1	TGACG	488	5	-
ZaNF-YA11	Unnamed__1	CGTGG	509	5	+
ZaNF-YA11	MYC	CATTTG	306	6	+
ZaNF-YA11	MYC	CATTTG	986	6	+
ZaNF-YA11	MYC	CATTTG	1505	6	+
ZaNF-YA11	GA-motif	ATAGATAA	1721	8	-
ZaNF-YA11	Box 4	ATTAAT	616	6	+
ZaNF-YA11	CARE	CAACTCCC	514	8	-
ZaNF-YA11	ARE	AAACCA	928	6	-
ZaNF-YA11	ARE	AAACCA	1598	6	-
ZaNF-YA11	CGTCA-motif	CGTCA	488	5	+
ZaNF-YA11	I-box	AGATAAGG	1802	8	-
ZaNF-YA11	W box	TTGACC	68	6	+
ZaNF-YA11	W box	TTGACC	311	6	-
ZaNF-YA11	P-box	CCTTTTG	149	7	-
ZaNF-YA11	ERE	ATTTTAAA	592	8	+
ZaNF-YA11	CCGTCC-box	CCGTCC	531	6	-
ZaNF-YA11	CCGTCC-box	CCGTCC	578	6	-
ZaNF-YA11	TCT-motif	TCTTAC	5	6	+
ZaNF-YA11	A-box	CCGTCC	531	6	-
ZaNF-YA11	A-box	CCGTCC	578	6	-
ZaNF-YA11	LTR	CCGAAA	117	6	-
ZaNF-YA11	LTR	CCGAAA	425	6	+
ZaNF-YA11	LTR	CCGAAA	1645	6	+
ZaNF-YA11	TATA-box	TACAAAA	8	7	+
ZaNF-YA11	TATA-box	TATTTAAA	594	8	-
ZaNF-YA11	TATA-box	ATATAA	599	6	+
ZaNF-YA11	TATA-box	TATA	600	4	+
ZaNF-YA11	TATA-box	ATATAA	620	6	+
ZaNF-YA11	TATA-box	TATA	621	4	+
ZaNF-YA11	TATA-box	ATATAT	678	6	+
ZaNF-YA11	TATA-box	TATA	679	4	+
ZaNF-YA11	TATA-box	TATAAAA	684	7	-
ZaNF-YA11	TATA-box	TATAAA	685	6	-
ZaNF-YA11	TATA-box	TATAA	686	5	-
ZaNF-YA11	TATA-box	TATA	687	4	+
ZaNF-YA11	TATA-box	ATTATA	696	6	+
ZaNF-YA11	TATA-box	TATAA	697	5	-
ZaNF-YA11	TATA-box	TATA	698	4	+
ZaNF-YA11	TATA-box	ATATAT	705	6	+
ZaNF-YA11	TATA-box	TATA	706	4	+
ZaNF-YA11	TATA-box	ATTATA	768	6	+
ZaNF-YA11	TATA-box	TATAA	769	5	-
ZaNF-YA11	TATA-box	TATA	770	4	+
ZaNF-YA11	TATA-box	TAAAGATT	1028	8	-
ZaNF-YA11	TATA-box	TATAAAT	1246	7	-
ZaNF-YA11	TATA-box	TATAAA	1247	6	-
ZaNF-YA11	TATA-box	TATAA	1248	5	-
ZaNF-YA11	TATA-box	TATA	1249	4	-
ZaNF-YA11	TATA-box	TATAA	1477	5	-
ZaNF-YA11	TATA-box	TATA	1478	4	-
ZaNF-YA11	TATA-box	ATTATA	1487	6	+
ZaNF-YA11	TATA-box	TATAA	1488	5	-
ZaNF-YA11	TATA-box	TATA	1489	4	-
ZaNF-YA11	ABRE	ACGTG	486	5	-
ZaNF-YA11	ABRE	ACGTG	822	5	+
ZaNF-YA11	ABRE	AACCCGG	1063	7	-
ZaNF-YA11	CCGTCC motif	CCGTCC	531	6	-
ZaNF-YA11	CCGTCC motif	CCGTCC	578	6	-
ZaNF-YA12	TCA	TCATCTTCAT	132	9	-
ZaNF-YA12	TCA-element	CCATCTTTTT	1638	9	+
ZaNF-YA12	STRE	AGGGG	83	5	+
ZaNF-YA12	Myc	TCTCTTA	110	7	+
ZaNF-YA12	Myc	TCTCTTA	1509	7	+
ZaNF-YA12	Myb	TAACTG	261	6	-
ZaNF-YA12	Myb	CAACTG	1707	6	+
ZaNF-YA12	CAAT-box	CAAT	48	4	-
ZaNF-YA12	CAAT-box	CAAT	62	4	-
ZaNF-YA12	CAAT-box	CAAT	119	4	+
ZaNF-YA12	CAAT-box	CCAAT	121	5	-
ZaNF-YA12	CAAT-box	CAAT	168	4	-
ZaNF-YA12	CAAT-box	CAAT	172	4	+
ZaNF-YA12	CAAT-box	CAAT	191	4	-
ZaNF-YA12	CAAT-box	CAAT	224	4	+
ZaNF-YA12	CAAT-box	CAAT	242	4	-
ZaNF-YA12	CAAT-box	CAAT	274	4	+
ZaNF-YA12	CAAT-box	CAAT	285	4	-
ZaNF-YA12	CAAT-box	CAAT	338	4	+
ZaNF-YA12	CAAT-box	CAAT	356	4	-
ZaNF-YA12	CAAT-box	CAAAT	411	5	+
ZaNF-YA12	CAAT-box	CCAAT	455	5	-
ZaNF-YA12	CAAT-box	CAAAT	470	5	+
ZaNF-YA12	CAAT-box	CCAAT	502	5	+
ZaNF-YA12	CAAT-box	CAAT	503	4	+
ZaNF-YA12	CAAT-box	CAAAT	524	5	+
ZaNF-YA12	CAAT-box	CAAT	531	4	+
ZaNF-YA12	CAAT-box	CCAAT	662	5	-
ZaNF-YA12	CAAT-box	CAAT	668	4	+
ZaNF-YA12	CAAT-box	CCAAT	785	5	+
ZaNF-YA12	CAAT-box	CAAT	786	4	+
ZaNF-YA12	CAAT-box	CAAT	828	4	-
ZaNF-YA12	CAAT-box	CAAT	862	4	-
ZaNF-YA12	CAAT-box	CAAAT	977	5	+
ZaNF-YA12	CAAT-box	CAAAT	990	5	-
ZaNF-YA12	CAAT-box	CAAT	1022	4	-
ZaNF-YA12	CAAT-box	CAAAT	1043	5	+
ZaNF-YA12	CAAT-box	CAAT	1059	4	-
ZaNF-YA12	CAAT-box	CAAT	1095	4	+
ZaNF-YA12	CAAT-box	CAAT	1099	4	-
ZaNF-YA12	CAAT-box	CAAT	1166	4	+
ZaNF-YA12	CAAT-box	CCAAT	1220	5	-
ZaNF-YA12	CAAT-box	CCAAT	1328	5	-
ZaNF-YA12	CAAT-box	CAAAT	1435	5	+
ZaNF-YA12	CAAT-box	CAAT	1438	4	-
ZaNF-YA12	CAAT-box	CAAAT	1460	5	+
ZaNF-YA12	CAAT-box	CAAAT	1564	5	-
ZaNF-YA12	CAAT-box	CAAT	1594	4	+
ZaNF-YA12	CAAT-box	CAAT	1638	4	+
ZaNF-YA12	CAAT-box	CAAAT	1655	5	+
ZaNF-YA12	CAAT-box	CAAT	1692	4	-
ZaNF-YA12	CAAT-box	CAAT	1714	4	-
ZaNF-YA12	CAAT-box	CAAT	1740	4	+
ZaNF-YA12	CAAT-box	CCAAT	1847	5	+
ZaNF-YA12	CAAT-box	CAAT	1848	4	+
ZaNF-YA12	CAAT-box	CCAAT	1892	5	-
ZaNF-YA12	CAAT-box	CAAT	1915	4	-
ZaNF-YA12	CAAT-box	CCAAT	1937	5	-
ZaNF-YA12	CAAT-box	CAAT	1964	4	-
ZaNF-YA12		motif_sequence	134	4	-
ZaNF-YA12		motif_sequence	226	4	+
ZaNF-YA12		motif_sequence	327	4	+
ZaNF-YA12		motif_sequence	760	4	+
ZaNF-YA12		motif_sequence	821	4	-
ZaNF-YA12		motif_sequence	858	4	-
ZaNF-YA12		motif_sequence	980	4	+
ZaNF-YA12		motif_sequence	1134	4	+
ZaNF-YA12		motif_sequence	1410	4	+
ZaNF-YA12		motif_sequence	1441	4	-
ZaNF-YA12		motif_sequence	1603	4	+
ZaNF-YA12	Unnamed__4	CTCC	329	4	+
ZaNF-YA12	Unnamed__4	CTCC	477	4	+
ZaNF-YA12	Unnamed__4	CTCC	1139	4	+
ZaNF-YA12	Unnamed__4	CTCC	1173	4	-
ZaNF-YA12	Unnamed__4	CTCC	1185	4	-
ZaNF-YA12	Unnamed__4	CTCC	1376	4	+
ZaNF-YA12	Unnamed__4	CTCC	1412	4	+
ZaNF-YA12	Unnamed__4	CTCC	1453	4	+
ZaNF-YA12	AE-box	AGAAACAA	1504	8	-
ZaNF-YA12	AE-box	AGAAACAA	1663	8	-
ZaNF-YA12	AT~TATA-box	TATATA	158	6	+
ZaNF-YA12	AT~TATA-box	TATATA	185	6	+
ZaNF-YA12	AT~TATA-box	TATATAAA	535	8	-
ZaNF-YA12	AT~TATA-box	TATATA	537	6	+
ZaNF-YA12	AT~TATA-box	TATATA	539	6	+
ZaNF-YA12	AT~TATA-box	TATATA	541	6	+
ZaNF-YA12	AT~TATA-box	TATATA	543	6	+
ZaNF-YA12	AT~TATA-box	TATATA	545	6	+
ZaNF-YA12	AT~TATA-box	TATATA	547	6	+
ZaNF-YA12	AT~TATA-box	TATATA	549	6	+
ZaNF-YA12	AT~TATA-box	TATATA	551	6	+
ZaNF-YA12	AT~TATA-box	TATATA	553	6	+
ZaNF-YA12	AT~TATA-box	TATATA	555	6	+
ZaNF-YA12	AT~TATA-box	TATATA	557	6	+
ZaNF-YA12	AT~TATA-box	TATATA	559	6	+
ZaNF-YA12	AT~TATA-box	TATATA	561	6	+
ZaNF-YA12	AT~TATA-box	TATATA	563	6	+
ZaNF-YA12	AT~TATA-box	TATATA	565	6	+
ZaNF-YA12	AT~TATA-box	TATATA	567	6	+
ZaNF-YA12	AT~TATA-box	TATATA	569	6	+
ZaNF-YA12	AT~TATA-box	TATATA	571	6	+
ZaNF-YA12	AT~TATA-box	TATATA	573	6	+
ZaNF-YA12	AT~TATA-box	TATATA	575	6	+
ZaNF-YA12	AT~TATA-box	TATATA	577	6	+
ZaNF-YA12	AT~TATA-box	TATATA	579	6	+
ZaNF-YA12	AT~TATA-box	TATATA	581	6	+
ZaNF-YA12	AT~TATA-box	TATATA	583	6	+
ZaNF-YA12	AT~TATA-box	TATATA	585	6	+
ZaNF-YA12	AT~TATA-box	TATATA	587	6	+
ZaNF-YA12	AT~TATA-box	TATATA	589	6	+
ZaNF-YA12	AT~TATA-box	TATATA	690	6	+
ZaNF-YA12	AT~TATA-box	TATATA	749	6	+
ZaNF-YA12	AT~TATA-box	TATATA	953	6	+
ZaNF-YA12	AT~TATA-box	TATATA	1227	6	-
ZaNF-YA12	MYB	TAACCA	1330	6	-
ZaNF-YA12	MBS	CAACTG	1707	6	+
ZaNF-YA12	chs-CMA2a	TCACTTGA	1524	8	-
ZaNF-YA12	TCT-motif	TCTTAC	387	6	+
ZaNF-YA12	TATA	TATAAAAT	533	8	-
ZaNF-YA12	TATA	TATAAAAT	591	8	+
ZaNF-YA12	LAMP-element	CTTTATCA	1030	8	-
ZaNF-YA12	ERE	ATTTTAAA	321	8	-
ZaNF-YA12	ERE	ATTTCATA	1274	8	+
ZaNF-YA12	W box	TTGACC	665	6	-
ZaNF-YA12	TATA-box	TATATA	158	6	+
ZaNF-YA12	TATA-box	ATATAT	159	6	+
ZaNF-YA12	TATA-box	TATA	160	4	+
ZaNF-YA12	TATA-box	TATACA	183	6	-
ZaNF-YA12	TATA-box	TATATA	185	6	+
ZaNF-YA12	TATA-box	ATATAA	186	6	+
ZaNF-YA12	TATA-box	TATA	187	4	+
ZaNF-YA12	TATA-box	TACATAAA	390	8	+
ZaNF-YA12	TATA-box	ATATAA	431	6	+
ZaNF-YA12	TATA-box	TATA	432	4	+
ZaNF-YA12	TATA-box	TATAAAA	534	7	-
ZaNF-YA12	TATA-box	TATAAA	535	6	-
ZaNF-YA12	TATA-box	TATATAA	536	7	-
ZaNF-YA12	TATA-box	TATATA	537	6	+
ZaNF-YA12	TATA-box	ATATAT	538	6	+
ZaNF-YA12	TATA-box	TATATA	539	6	+
ZaNF-YA12	TATA-box	ATATAT	540	6	+
ZaNF-YA12	TATA-box	TATATA	541	6	+
ZaNF-YA12	TATA-box	ATATAT	542	6	+
ZaNF-YA12	TATA-box	TATATA	543	6	+
ZaNF-YA12	TATA-box	ATATAT	544	6	+
ZaNF-YA12	TATA-box	TATATA	545	6	+
ZaNF-YA12	TATA-box	ATATAT	546	6	+
ZaNF-YA12	TATA-box	TATATA	547	6	+
ZaNF-YA12	TATA-box	ATATAT	548	6	+
ZaNF-YA12	TATA-box	TATATA	549	6	+
ZaNF-YA12	TATA-box	ATATAT	550	6	+
ZaNF-YA12	TATA-box	TATATA	551	6	+
ZaNF-YA12	TATA-box	ATATAT	552	6	+
ZaNF-YA12	TATA-box	TATATA	553	6	+
ZaNF-YA12	TATA-box	ATATAT	554	6	+
ZaNF-YA12	TATA-box	TATATA	555	6	+
ZaNF-YA12	TATA-box	ATATAT	556	6	+
ZaNF-YA12	TATA-box	TATATA	557	6	+
ZaNF-YA12	TATA-box	ATATAT	558	6	+
ZaNF-YA12	TATA-box	TATATA	559	6	+
ZaNF-YA12	TATA-box	ATATAT	560	6	+
ZaNF-YA12	TATA-box	TATATA	561	6	+
ZaNF-YA12	TATA-box	ATATAT	562	6	+
ZaNF-YA12	TATA-box	TATATA	563	6	+
ZaNF-YA12	TATA-box	ATATAT	564	6	+
ZaNF-YA12	TATA-box	TATATA	565	6	+
ZaNF-YA12	TATA-box	ATATAT	566	6	+
ZaNF-YA12	TATA-box	TATATA	567	6	+
ZaNF-YA12	TATA-box	ATATAT	568	6	+
ZaNF-YA12	TATA-box	TATATA	569	6	+
ZaNF-YA12	TATA-box	ATATAT	570	6	+
ZaNF-YA12	TATA-box	TATATA	571	6	+
ZaNF-YA12	TATA-box	ATATAT	572	6	+
ZaNF-YA12	TATA-box	TATATA	573	6	+
ZaNF-YA12	TATA-box	ATATAT	574	6	+
ZaNF-YA12	TATA-box	TATATA	575	6	+
ZaNF-YA12	TATA-box	ATATAT	576	6	+
ZaNF-YA12	TATA-box	TATATA	577	6	+
ZaNF-YA12	TATA-box	ATATAT	578	6	+
ZaNF-YA12	TATA-box	TATATA	579	6	+
ZaNF-YA12	TATA-box	ATATAT	580	6	+
ZaNF-YA12	TATA-box	TATATA	581	6	+
ZaNF-YA12	TATA-box	ATATAT	582	6	+
ZaNF-YA12	TATA-box	TATATA	583	6	+
ZaNF-YA12	TATA-box	ATATAT	584	6	+
ZaNF-YA12	TATA-box	TATATA	585	6	+
ZaNF-YA12	TATA-box	ATATAT	586	6	+
ZaNF-YA12	TATA-box	TATATA	587	6	+
ZaNF-YA12	TATA-box	ATATAT	588	6	+
ZaNF-YA12	TATA-box	TATATA	589	6	+
ZaNF-YA12	TATA-box	ATATAA	590	6	+
ZaNF-YA12	TATA-box	TATA	591	4	+
ZaNF-YA12	TATA-box	TATATA	690	6	+
ZaNF-YA12	TATA-box	ATATAT	691	6	+
ZaNF-YA12	TATA-box	TATA	692	4	+
ZaNF-YA12	TATA-box	ATTATA	747	6	+
ZaNF-YA12	TATA-box	TATATAA	748	7	-
ZaNF-YA12	TATA-box	TATATA	749	6	+
ZaNF-YA12	TATA-box	ATATAT	750	6	+
ZaNF-YA12	TATA-box	TATA	751	4	+
ZaNF-YA12	TATA-box	TATACA	755	6	-
ZaNF-YA12	TATA-box	TATA	757	4	+
ZaNF-YA12	TATA-box	TATAAATA	790	8	-
ZaNF-YA12	TATA-box	TATAAAT	791	7	-
ZaNF-YA12	TATA-box	TATAAA	792	6	-
ZaNF-YA12	TATA-box	TATAA	793	5	-
ZaNF-YA12	TATA-box	TATA	794	4	+
ZaNF-YA12	TATA-box	TACAAAA	796	7	+
ZaNF-YA12	TATA-box	ATATAT	874	6	+
ZaNF-YA12	TATA-box	TATA	875	4	+
ZaNF-YA12	TATA-box	ATATAA	882	6	+
ZaNF-YA12	TATA-box	TATA	883	4	+
ZaNF-YA12	TATA-box	ATTATA	951	6	+
ZaNF-YA12	TATA-box	TATATAA	952	7	-
ZaNF-YA12	TATA-box	TATATA	953	6	+
ZaNF-YA12	TATA-box	TATA	955	4	+
ZaNF-YA12	TATA-box	ATTATA	1005	6	+
ZaNF-YA12	TATA-box	TATAA	1006	5	-
ZaNF-YA12	TATA-box	TATA	1007	4	-
ZaNF-YA12	TATA-box	TATAAAT	1012	7	-
ZaNF-YA12	TATA-box	TATAAA	1013	6	-
ZaNF-YA12	TATA-box	TATAA	1014	5	-
ZaNF-YA12	TATA-box	TATA	1015	4	-
ZaNF-YA12	TATA-box	TAAAGATT	1087	8	-
ZaNF-YA12	TATA-box	ATTATA	1225	6	+
ZaNF-YA12	TATA-box	TATATAA	1226	7	-
ZaNF-YA12	TATA-box	TATATA	1227	6	-
ZaNF-YA12	TATA-box	ATATAA	1228	6	+
ZaNF-YA12	TATA-box	TATA	1229	4	-
ZaNF-YA12	TATA-box	ATATAA	1265	6	+
ZaNF-YA12	TATA-box	TATA	1266	4	-
ZaNF-YA12	TATA-box	TACAAAA	1555	7	-
ZaNF-YA12	TATA-box	TAAAGATT	1582	8	-
ZaNF-YA12	TATA-box	ATATAT	1622	6	-
ZaNF-YA12	TATA-box	TATA	1623	4	-
ZaNF-YA12	TATA-box	TATTTAAA	1789	8	-
ZaNF-YA12	TATA-box	ATATAA	1884	6	+
ZaNF-YA12	TATA-box	TATA	1885	4	-
ZaNF-YA12	TATA-box	ATATAA	1977	6	+
ZaNF-YA12	TATA-box	TATA	1978	4	-
ZaNF-YA12	DRE1	ACCGAGA	925	7	+
ZaNF-YA12	chs-CMA1a	TTACTTAA	233	8	+
ZaNF-YA12	MYB-like sequence	TAACCA	1330	6	-
ZaNF-YA12	AAGAA-motif	gGTAAAGAAA	1673	9	-
ZaNF-YA12	AAGAA-motif	GAAAGAA	1852	7	-
ZaNF-YA12	GT1-motif	GGTTAAT	1331	7	+
ZaNF-YA12	GT1-motif	GGTTAAT	1773	7	+
ZaNF-YA12	I-box	TGATAATGT	633	9	-
ZaNF-YA12	I-box	AAGATAAGGCT	846	10	+
ZaNF-YA12	ARE	AAACCA	714	6	+
ZaNF-YA12	ARE	AAACCA	869	6	+
ZaNF-YA12	ARE	AAACCA	1785	6	-
ZaNF-YA12	MRE	AACCTAA	1925	7	-
ZaNF-YA12	Box 4	ATTAAT	138	6	+
ZaNF-YA12	Box 4	ATTAAT	658	6	+
ZaNF-YA12	Box 4	ATTAAT	1081	6	-
ZaNF-YA12	Unnamed__1	GAATTTAATTAA	880	11	+
ZaNF-YA12	MYC	CAATTG	119	6	+
ZaNF-YA12	MYC	CATTTG	470	6	-
ZaNF-YA12	MYC	CATTTG	977	6	-
ZaNF-YA12	MYC	CATTTG	989	6	+
ZaNF-YA12	MYC	CATTTG	1460	6	-
ZaNF-YA12	MYC	CATTTG	1563	6	+
ZaNF-YA12	MYC	CATTTG	1655	6	-
ZaNF-YA13	TGA-element	AACGAC	1247	6	-
ZaNF-YA13	circadian	CAAAGATATC	340	9	+
ZaNF-YA13	MYB	CAACCA	638	6	+
ZaNF-YA13	MYB	TAACCA	1234	6	-
ZaNF-YA13	MYB	CAACAG	1333	6	-
ZaNF-YA13	MYB	CAACCA	1654	6	-
ZaNF-YA13	CAT-box	GCCACT	1584	6	+
ZaNF-YA13	TGACG-motif	TGACG	64	5	+
ZaNF-YA13	TGACG-motif	TGACG	154	5	-
ZaNF-YA13	TGACG-motif	TGACG	717	5	-
ZaNF-YA13	TGACG-motif	TGACG	1819	5	+
ZaNF-YA13	Unnamed__4	CTCC	612	4	+
ZaNF-YA13	Unnamed__4	CTCC	1077	4	-
ZaNF-YA13	Unnamed__4	CTCC	1090	4	-
ZaNF-YA13	Unnamed__4	CTCC	1369	4	+
ZaNF-YA13	Unnamed__4	CTCC	1852	4	+
ZaNF-YA13	AT-rich element	ATAGAAATCAA	1623	10	-
ZaNF-YA13	AT~TATA-box	TATATA	346	6	+
ZaNF-YA13	AT~TATA-box	TATATA	348	6	+
ZaNF-YA13	AT~TATA-box	TATATA	350	6	+
ZaNF-YA13	AT~TATA-box	TATATA	352	6	+
ZaNF-YA13	AT~TATA-box	TATATA	354	6	+
ZaNF-YA13	AT~TATA-box	TATATA	356	6	+
ZaNF-YA13	AT~TATA-box	TATATA	358	6	+
ZaNF-YA13	AT~TATA-box	TATATA	360	6	+
ZaNF-YA13	AT~TATA-box	TATATA	870	6	+
ZaNF-YA13	AT~TATA-box	TATATA	872	6	+
ZaNF-YA13	AT~TATA-box	TATATA	874	6	+
ZaNF-YA13	AT~TATA-box	TATATAAA	893	8	-
ZaNF-YA13	AT~TATA-box	TATATA	895	6	+
ZaNF-YA13	AT~TATA-box	TATATAAA	1026	8	-
ZaNF-YA13	AT~TATA-box	TATATA	1028	6	-
ZaNF-YA13	AT~TATA-box	TATATA	1131	6	-
ZaNF-YA13	AT~TATA-box	TATATA	1795	6	-
ZaNF-YA13	AE-box	AGAAACAA	842	8	+
ZaNF-YA13	AE-box	AGAAACAA	1420	8	-
ZaNF-YA13	AE-box	AGAAACAA	1562	8	-
ZaNF-YA13	Myb	TAACTG	739	6	+
ZaNF-YA13	WRE3	CCACCT	592	6	-
ZaNF-YA13	MYB recognition site	CCGTTG	182	6	+
ZaNF-YA13	Gap-box	CAAATGAA(A/G)A	615	9.5	+
ZaNF-YA13	CAAT-box	CAAT	20	4	-
ZaNF-YA13	CAAT-box	CAAT	61	4	+
ZaNF-YA13	CAAT-box	CAAAT	236	5	-
ZaNF-YA13	CAAT-box	CAAT	278	4	-
ZaNF-YA13	CAAT-box	CAAT	328	4	+
ZaNF-YA13	CAAT-box	CAAT	385	4	+
ZaNF-YA13	CAAT-box	CCAAT	467	5	-
ZaNF-YA13	CAAT-box	CAAT	513	4	+
ZaNF-YA13	CAAT-box	CAAT	584	4	-
ZaNF-YA13	CAAT-box	CAAAT	605	5	+
ZaNF-YA13	CAAT-box	CAAAT	615	5	+
ZaNF-YA13	CAAT-box	CAAAT	684	5	-
ZaNF-YA13	CAAT-box	CAAAT	847	5	+
ZaNF-YA13	CAAT-box	CAAT	906	4	-
ZaNF-YA13	CAAT-box	CAAT	967	4	-
ZaNF-YA13	CAAT-box	CAAAT	1002	5	-
ZaNF-YA13	CAAT-box	CAAAT	1054	5	+
ZaNF-YA13	CAAT-box	CAAAT	1123	5	-
ZaNF-YA13	CAAT-box	CCAAT	1229	5	+
ZaNF-YA13	CAAT-box	CAAT	1230	4	+
ZaNF-YA13	CAAT-box	CCAAT	1232	5	-
ZaNF-YA13	CAAT-box	CAAT	1354	4	-
ZaNF-YA13	CAAT-box	CAAAT	1376	5	+
ZaNF-YA13	CAAT-box	CAAAT	1554	5	+
ZaNF-YA13	CAAT-box	CAAAT	1621	5	-
ZaNF-YA13	CAAT-box	CCAAT	1800	5	-
ZaNF-YA13	CAAT-box	CAAAT	1830	5	-
ZaNF-YA13	CAAT-box	CAAT	1893	4	-
ZaNF-YA13	CAAT-box	CCAAT	1970	5	-
ZaNF-YA13		motif_sequence	290	4	+
ZaNF-YA13		motif_sequence	915	4	+
ZaNF-YA13		motif_sequence	1039	4	+
ZaNF-YA13		motif_sequence	1090	4	-
ZaNF-YA13		motif_sequence	1357	4	-
ZaNF-YA13		motif_sequence	1453	4	+
ZaNF-YA13		motif_sequence	1455	4	-
ZaNF-YA13		motif_sequence	1506	4	+
ZaNF-YA13		motif_sequence	1850	4	+
ZaNF-YA13	STRE	AGGGG	1303	5	-
ZaNF-YA13	TCA-element	CCATCTTTTT	1854	9	+
ZaNF-YA13	HD-Zip 3	GTAAT(G/C)ATTAC	859	9.5	+
ZaNF-YA13	G-box	CACGTC	65	6	-
ZaNF-YA13	Box 4	ATTAAT	106	6	+
ZaNF-YA13	Box 4	ATTAAT	663	6	+
ZaNF-YA13	Box 4	ATTAAT	936	6	+
ZaNF-YA13	Box 4	ATTAAT	1172	6	-
ZaNF-YA13	Unnamed__1	GAATTTAATTAA	415	11	+
ZaNF-YA13	MYC	CATTTG	605	6	-
ZaNF-YA13	MYC	CATTTG	615	6	-
ZaNF-YA13	MYC	CAATTG	1230	6	-
ZaNF-YA13	MYC	CATTTG	1376	6	-
ZaNF-YA13	MYC	CATTTG	1554	6	-
ZaNF-YA13	MYC	CATTTG	1829	6	+
ZaNF-YA13	GT1-motif	GGTTAAT	1235	7	+
ZaNF-YA13	GARE-motif	TCTGTTG	1332	7	+
ZaNF-YA13	CGTCA-motif	CGTCA	64	5	-
ZaNF-YA13	CGTCA-motif	CGTCA	154	5	+
ZaNF-YA13	CGTCA-motif	CGTCA	717	5	+
ZaNF-YA13	CGTCA-motif	CGTCA	1819	5	-
ZaNF-YA13	Myb-binding site	CAACAG	1333	6	-
ZaNF-YA13	ARE	AAACCA	469	6	-
ZaNF-YA13	CCAAT-box	CAACGG	182	6	-
ZaNF-YA13	AAGAA-motif	GAAAGAA	839	7	+
ZaNF-YA13	as-1	TGACG	64	5	+
ZaNF-YA13	as-1	TGACG	154	5	-
ZaNF-YA13	as-1	TGACG	717	5	-
ZaNF-YA13	as-1	TGACG	1819	5	+
ZaNF-YA13	MYB-like sequence	TAACCA	1234	6	-
ZaNF-YA13	LTR	CCGAAA	919	6	+
ZaNF-YA13	Unnamed__6	taTAAATATct	343	10	-
ZaNF-YA13	TATA-box	ATATAA	50	6	+
ZaNF-YA13	TATA-box	TATA	51	4	+
ZaNF-YA13	TATA-box	TATA	57	4	+
ZaNF-YA13	TATA-box	TATAAA	117	6	-
ZaNF-YA13	TATA-box	TATAA	118	5	-
ZaNF-YA13	TATA-box	TATA	119	4	+
ZaNF-YA13	TATA-box	ATTATA	163	6	+
ZaNF-YA13	TATA-box	TATAA	164	5	-
ZaNF-YA13	TATA-box	TATA	165	4	+
ZaNF-YA13	TATA-box	TATA	189	4	+
ZaNF-YA13	TATA-box	taTATAAAtc	285	9	-
ZaNF-YA13	TATA-box	TACATAAA	287	8	-
ZaNF-YA13	TATA-box	TATA	317	4	+
ZaNF-YA13	TATA-box	taTATAAAtc	344	9	-
ZaNF-YA13	TATA-box	ATATAT	345	6	+
ZaNF-YA13	TATA-box	TATATA	346	6	+
ZaNF-YA13	TATA-box	ATATAT	347	6	+
ZaNF-YA13	TATA-box	TATATA	348	6	+
ZaNF-YA13	TATA-box	ATATAT	349	6	+
ZaNF-YA13	TATA-box	TATATA	350	6	+
ZaNF-YA13	TATA-box	ATATAT	351	6	+
ZaNF-YA13	TATA-box	TATATA	352	6	+
ZaNF-YA13	TATA-box	ATATAT	353	6	+
ZaNF-YA13	TATA-box	TATATA	354	6	+
ZaNF-YA13	TATA-box	ATATAT	355	6	+
ZaNF-YA13	TATA-box	TATATA	356	6	+
ZaNF-YA13	TATA-box	ATATAT	357	6	+
ZaNF-YA13	TATA-box	TATATA	358	6	+
ZaNF-YA13	TATA-box	ATATAT	359	6	+
ZaNF-YA13	TATA-box	TATATA	360	6	+
ZaNF-YA13	TATA-box	ATATAT	361	6	+
ZaNF-YA13	TATA-box	TATA	362	4	+
ZaNF-YA13	TATA-box	ATTATA	398	6	+
ZaNF-YA13	TATA-box	TATAA	399	5	-
ZaNF-YA13	TATA-box	TATA	400	4	+
ZaNF-YA13	TATA-box	TATA	486	4	+
ZaNF-YA13	TATA-box	TATA	589	4	+
ZaNF-YA13	TATA-box	TACAAAA	656	7	+
ZaNF-YA13	TATA-box	TATA	776	4	+
ZaNF-YA13	TATA-box	TATA	858	4	+
ZaNF-YA13	TATA-box	TATATA	870	6	+
ZaNF-YA13	TATA-box	ATATAT	871	6	+
ZaNF-YA13	TATA-box	TATATA	872	6	+
ZaNF-YA13	TATA-box	ATATAT	873	6	+
ZaNF-YA13	TATA-box	TATATA	874	6	+
ZaNF-YA13	TATA-box	ATATAA	875	6	+
ZaNF-YA13	TATA-box	TATA	876	4	+
ZaNF-YA13	TATA-box	TATAAA	893	6	-
ZaNF-YA13	TATA-box	TATATAA	894	7	-
ZaNF-YA13	TATA-box	TATATA	895	6	+
ZaNF-YA13	TATA-box	ATATAA	896	6	+
ZaNF-YA13	TATA-box	TATA	897	4	+
ZaNF-YA13	TATA-box	TATA	947	4	+
ZaNF-YA13	TATA-box	TATAAAA	1025	7	-
ZaNF-YA13	TATA-box	TATAAA	1026	6	-
ZaNF-YA13	TATA-box	TATATAA	1027	7	-
ZaNF-YA13	TATA-box	TATATA	1028	6	-
ZaNF-YA13	TATA-box	ATATAT	1029	6	-
ZaNF-YA13	TATA-box	TATA	1030	4	-
ZaNF-YA13	TATA-box	ATTATA	1129	6	+
ZaNF-YA13	TATA-box	TATATAA	1130	7	-
ZaNF-YA13	TATA-box	TATATA	1131	6	-
ZaNF-YA13	TATA-box	ATATAA	1132	6	+
ZaNF-YA13	TATA-box	TATA	1133	4	-
ZaNF-YA13	TATA-box	TATAAAA	1177	7	-
ZaNF-YA13	TATA-box	TATAAA	1178	6	-
ZaNF-YA13	TATA-box	TATAA	1179	5	-
ZaNF-YA13	TATA-box	TATA	1180	4	-
ZaNF-YA13	TATA-box	TACAAAA	1202	7	+
ZaNF-YA13	TATA-box	TAAAGATT	1494	8	-
ZaNF-YA13	TATA-box	TATACA	1519	6	-
ZaNF-YA13	TATA-box	TATA	1521	4	-
ZaNF-YA13	TATA-box	ATATAT	1794	6	-
ZaNF-YA13	TATA-box	TATATA	1795	6	-
ZaNF-YA13	TATA-box	ATATAT	1796	6	-
ZaNF-YA13	TATA-box	TATA	1797	4	-
ZaNF-YA13	TATA-box	ATTATA	1810	6	+
ZaNF-YA13	TATA-box	TATAA	1811	5	-
ZaNF-YA13	TATA-box	TATA	1812	4	-
ZaNF-YA13	ABRE	ACGTG	66	5	+
ZaNF-YA13	P-box	CCTTTTG	1541	7	+
ZaNF-YA13	P-box	CCTTTTG	1787	7	-
ZaNF-YA13	chs-CMA2a	TCACTTGA	1442	8	-
ZaNF-YA13	TCT-motif	TCTTAC	543	6	+
ZaNF-YA13	TATA	TATAAAAT	1176	8	-
ZaNF-YA14	AP-1	TGAGTTAG	509	8	-
ZaNF-YA14	TCT-motif	TCTTAC	1027	6	-
ZaNF-YA14	LAMP-element	CTTTATCA	186	8	-
ZaNF-YA14	ERE	ATTTTAAA	666	8	+
ZaNF-YA14	ERE	ATTTTAAA	668	8	-
ZaNF-YA14	ERE	ATTTTAAA	1382	8	+
ZaNF-YA14	W box	TTGACC	123	6	+
ZaNF-YA14	W box	TTGACC	915	6	+
ZaNF-YA14	W box	TTGACC	1497	6	+
ZaNF-YA14	TATA-box	ATATAT	3	6	+
ZaNF-YA14	TATA-box	TATA	4	4	+
ZaNF-YA14	TATA-box	TATAAAA	414	7	-
ZaNF-YA14	TATA-box	TATAAA	415	6	-
ZaNF-YA14	TATA-box	TATAA	416	5	-
ZaNF-YA14	TATA-box	TATA	417	4	+
ZaNF-YA14	TATA-box	ATTATA	716	6	+
ZaNF-YA14	TATA-box	TATAA	717	5	-
ZaNF-YA14	TATA-box	TATA	718	4	+
ZaNF-YA14	TATA-box	TATA	768	4	+
ZaNF-YA14	TATA-box	ATTATA	791	6	+
ZaNF-YA14	TATA-box	TATAA	792	5	-
ZaNF-YA14	TATA-box	TATA	793	4	+
ZaNF-YA14	TATA-box	ATATAA	876	6	+
ZaNF-YA14	TATA-box	TATA	877	4	+
ZaNF-YA14	TATA-box	TAAAGATT	1013	8	-
ZaNF-YA14	TATA-box	TACAAAA	1023	7	-
ZaNF-YA14	TATA-box	TATAAA	1150	6	-
ZaNF-YA14	TATA-box	TATAA	1151	5	-
ZaNF-YA14	TATA-box	TATA	1152	4	-
ZaNF-YA14	TATA-box	TATA	1169	4	-
ZaNF-YA14	TATA-box	TACAAAA	1217	7	-
ZaNF-YA14	TATA-box	TACAAAA	1251	7	-
ZaNF-YA14	TATA-box	TATTTAAA	1305	8	-
ZaNF-YA14	TATA-box	ATATAA	1338	6	+
ZaNF-YA14	TATA-box	TATA	1339	4	-
ZaNF-YA14	TATA-box	ATATAT	1455	6	-
ZaNF-YA14	TATA-box	TATATA	1456	6	-
ZaNF-YA14	TATA-box	ATATAA	1457	6	+
ZaNF-YA14	TATA-box	TATA	1458	4	-
ZaNF-YA14	TATA-box	ATATAA	1462	6	+
ZaNF-YA14	TATA-box	TATA	1463	4	-
ZaNF-YA14	TATA-box	ATATAA	1621	6	+
ZaNF-YA14	TATA-box	TATA	1622	4	-
ZaNF-YA14	TATA-box	ATATAT	1717	6	-
ZaNF-YA14	TATA-box	TATA	1718	4	-
ZaNF-YA14	TATA-box	TATAA	1726	5	-
ZaNF-YA14	TATA-box	TATA	1727	4	-
ZaNF-YA14	TATA-box	ATATAA	1746	6	+
ZaNF-YA14	TATA-box	TATA	1747	4	-
ZaNF-YA14	ABRE	GACACGTGGC	131	9	+
ZaNF-YA14	ABRE	CACGTG	133	6	+
ZaNF-YA14	ABRE	ACGTG	134	5	+
ZaNF-YA14	ABRE	CACGTG	986	6	+
ZaNF-YA14	ABRE	ACGTG	987	5	+
ZaNF-YA14	ABRE	ACGTG	1146	5	-
ZaNF-YA14	ABRE	ACGTG	1482	5	+
ZaNF-YA14	MBSI	TTTTTACGGTTA	1443	11	-
ZaNF-YA14	LTR	CCGAAA	28	6	-
ZaNF-YA14	LTR	CCGAAA	1672	6	+
ZaNF-YA14	Sp1	GGGCGG	103	6	-
ZaNF-YA14	as-1	TGACG	1526	5	+
ZaNF-YA14	I-box	gGATAAGGTG	1477	9	+
ZaNF-YA14	I-box	GTATAAGGCC	1722	9	-
ZaNF-YA14	CGTCA-motif	CGTCA	1526	5	-
ZaNF-YA14	ARE	AAACCA	494	6	+
ZaNF-YA14	Box 4	ATTAAT	1274	6	-
ZaNF-YA14	Unnamed__1	CGTGG	135	5	+
ZaNF-YA14	Unnamed__1	CGTGG	985	5	-
ZaNF-YA14	Unnamed__1	GAATTTAATTAA	1409	11	+
ZaNF-YA14	Unnamed__1	CGTGG	1551	5	-
ZaNF-YA14	MYC	CATTTG	943	6	-
ZaNF-YA14	G-box	CAGACGTGGCA	131	10	+
ZaNF-YA14	G-box	ACACGTGGC	132	9	+
ZaNF-YA14	G-box	CACGTG	133	6	+
ZaNF-YA14	G-box	CACGTG	986	6	+
ZaNF-YA14	G-box	TAAACGTG	1146	8	-
ZaNF-YA14	G-box	CACGAC	1698	6	+
ZaNF-YA14	RY-element	CATGCATG	1757	8	-
ZaNF-YA14	STRE	AGGGG	980	5	-
ZaNF-YA14	GATA-motif	AAGATAAGATT	167	10	+
ZaNF-YA14	Myc	TCTCTTA	239	7	-
ZaNF-YA14	TGA-box	TGACGTAA	1526	8	+
ZaNF-YA14	Myb	CAACTG	1572	6	+
ZaNF-YA14	WRE3	CCACCT	1312	6	-
ZaNF-YA14	CAAT-box	CAAT	80	4	+
ZaNF-YA14	CAAT-box	CAAT	122	4	-
ZaNF-YA14	CAAT-box	CAAAT	153	5	+
ZaNF-YA14	CAAT-box	CAAAT	195	5	+
ZaNF-YA14	CAAT-box	CAAT	285	4	+
ZaNF-YA14	CAAT-box	CAAT	366	4	-
ZaNF-YA14	CAAT-box	CAAAT	399	5	-
ZaNF-YA14	CAAT-box	CAAAT	458	5	+
ZaNF-YA14	CAAT-box	CAAT	515	4	+
ZaNF-YA14	CAAT-box	CCAAT	532	5	-
ZaNF-YA14	CAAT-box	CAAT	587	4	-
ZaNF-YA14	CAAT-box	CAAAT	613	5	+
ZaNF-YA14	CAAT-box	CAAT	685	4	-
ZaNF-YA14	CAAT-box	CAAAT	724	5	+
ZaNF-YA14	CAAT-box	CAAT	759	4	-
ZaNF-YA14	CAAT-box	CAAT	848	4	-
ZaNF-YA14	CAAT-box	CAAT	914	4	-
ZaNF-YA14	CAAT-box	CAAAT	943	5	+
ZaNF-YA14	CAAT-box	CAAT	1283	4	+
ZaNF-YA14	CAAT-box	CAAT	1289	4	+
ZaNF-YA14	CAAT-box	CAAAT	1335	5	+
ZaNF-YA14	CAAT-box	CCAAT	1365	5	+
ZaNF-YA14	CAAT-box	CAAT	1366	4	+
ZaNF-YA14	CAAT-box	CCAAT	1517	5	-
ZaNF-YA14	CAAT-box	CCAAT	1566	5	+
ZaNF-YA14	CAAT-box	CAAT	1567	4	+
ZaNF-YA14	CAAT-box	CAAT	1635	4	+
ZaNF-YA14	CAAT-box	CAAT	1680	4	+
ZaNF-YA14	CAAT-box	CCAAT	1780	5	+
ZaNF-YA14	CAAT-box	CAAT	1781	4	+
ZaNF-YA14	CAAT-box	CAAAT	1793	5	+
ZaNF-YA14	CAAT-box	CAAAT	1812	5	+
ZaNF-YA14	CAAT-box	CAAT	1821	4	+
ZaNF-YA14	CAAT-box	CCAAT	1834	5	+
ZaNF-YA14	CAAT-box	CAAT	1835	4	+
ZaNF-YA14	CAAT-box	CAAT	1871	4	-
ZaNF-YA14		motif_sequence	306	4	+
ZaNF-YA14		motif_sequence	561	4	-
ZaNF-YA14		motif_sequence	567	4	-
ZaNF-YA14		motif_sequence	606	4	-
ZaNF-YA14		motif_sequence	787	4	-
ZaNF-YA14		motif_sequence	858	4	-
ZaNF-YA14		motif_sequence	1115	4	-
ZaNF-YA14		motif_sequence	1265	4	+
ZaNF-YA14		motif_sequence	1592	4	-
ZaNF-YA14		motif_sequence	1787	4	+
ZaNF-YA14	box S	AGCCACC	1313	7	-
ZaNF-YA14	Unnamed__4	CTCC	61	4	-
ZaNF-YA14	Unnamed__4	CTCC	751	4	+
ZaNF-YA14	Unnamed__4	CTCC	983	4	+
ZaNF-YA14	Unnamed__4	CTCC	1189	4	+
ZaNF-YA14	Unnamed__4	CTCC	1688	4	-
ZaNF-YA14	AT~TATA-box	TATATA	1456	6	-
ZaNF-YA14	G-Box	CACGTG	133	6	+
ZaNF-YA14	G-Box	CACGTG	986	6	+
ZaNF-YA14	G-Box	CACGTT	1146	6	+
ZaNF-YA14	G-Box	CACGTT	1481	6	-
ZaNF-YA14	TGACG-motif	TGACG	1526	5	+
ZaNF-YA14	MYB	CAACCA	297	6	+
ZaNF-YA14	CAT-box	GCCACT	1642	6	+
ZaNF-YA14	MBS	CAACTG	1572	6	+
ZaNF-YA14	ACA-motif	AATTACAGCCATT	656	13	+
ZaNF-YA15	MYB	CAACCA	199	6	+
ZaNF-YA15	MYB	CAACAG	671	6	-
ZaNF-YA15	MYB	CAACCA	1118	6	-
ZaNF-YA15	GTGGC-motif	GATTCTGTGGC	667	10	+
ZaNF-YA15	AE-box	AGAAACAA	878	8	-
ZaNF-YA15	AE-box	AGAAACAA	970	8	-
ZaNF-YA15	AE-box	AGAAACAA	1363	8	-
ZaNF-YA15	AT~TATA-box	TATATA	219	6	+
ZaNF-YA15	AT~TATA-box	TATATA	767	6	+
ZaNF-YA15	Unnamed__4	CTCC	727	4	-
ZaNF-YA15	Unnamed__4	CTCC	945	4	+
ZaNF-YA15	Unnamed__4	CTCC	1009	4	-
ZaNF-YA15	Unnamed__4	CTCC	1733	4	+
ZaNF-YA15	Unnamed__4	CTCC	1946	4	+
ZaNF-YA15	TGACG-motif	TGACG	31	5	-
ZaNF-YA15	Myc	TCTCTTA	1677	7	+
ZaNF-YA15	STRE	AGGGG	1246	5	-
ZaNF-YA15	WUN-motif	TTATTACAT	109	9	+
ZaNF-YA15	WUN-motif	CAATTACAT	1691	9	-
ZaNF-YA15		motif_sequence	267	4	-
ZaNF-YA15		motif_sequence	343	4	+
ZaNF-YA15		motif_sequence	1606	4	+
ZaNF-YA15		motif_sequence	1794	4	+
ZaNF-YA15		motif_sequence	1842	4	+
ZaNF-YA15		motif_sequence	1961	4	-
ZaNF-YA15	CAAT-box	CAAT	38	4	+
ZaNF-YA15	CAAT-box	CAAT	148	4	-
ZaNF-YA15	CAAT-box	CCAAT	348	5	+
ZaNF-YA15	CAAT-box	CAAT	349	4	+
ZaNF-YA15	CAAT-box	CAAT	432	4	+
ZaNF-YA15	CAAT-box	CAAT	485	4	+
ZaNF-YA15	CAAT-box	CCAAT	498	5	-
ZaNF-YA15	CAAT-box	CAAT	527	4	-
ZaNF-YA15	CAAT-box	CAAAT	592	5	-
ZaNF-YA15	CAAT-box	CAAAT	747	5	-
ZaNF-YA15	CAAT-box	CAAAT	861	5	-
ZaNF-YA15	CAAT-box	CCAAT	896	5	+
ZaNF-YA15	CAAT-box	CAAT	897	4	+
ZaNF-YA15	CAAT-box	CCAAT	1116	5	-
ZaNF-YA15	CAAT-box	CAAT	1131	4	-
ZaNF-YA15	CAAT-box	CAAAT	1260	5	-
ZaNF-YA15	CAAT-box	CAAT	1297	4	+
ZaNF-YA15	CAAT-box	CAAT	1397	4	-
ZaNF-YA15	CAAT-box	CAAT	1457	4	+
ZaNF-YA15	CAAT-box	CAAT	1528	4	-
ZaNF-YA15	CAAT-box	CAAT	1588	4	+
ZaNF-YA15	CAAT-box	CCAAT	1696	5	-
ZaNF-YA15	CAAT-box	CAAT	1702	4	-
ZaNF-YA15	CAAT-box	CAAAT	1743	5	-
ZaNF-YA15	CAAT-box	CAAT	1753	4	-
ZaNF-YA15	CAAT-box	CAAT	1782	4	+
ZaNF-YA15	CAAT-box	CCAAT	1804	5	+
ZaNF-YA15	CAAT-box	CAAT	1805	4	+
ZaNF-YA15	CAAT-box	CAAAT	1807	5	-
ZaNF-YA15	CAAT-box	CAAAT	1957	5	-
ZaNF-YA15	CAAT-box	CAAT	1965	4	-
ZaNF-YA15	WRE3	CCACCT	686	6	-
ZaNF-YA15	WRE3	CCACCT	729	6	-
ZaNF-YA15	MYB recognition site	CCGTTG	1713	6	+
ZaNF-YA15	G-box	CACGAC	176	6	+
ZaNF-YA15	G-box	CACGAC	441	6	+
ZaNF-YA15	G-box	CACGAC	722	6	-
ZaNF-YA15	TCA	TCATCTTCAT	317	9	+
ZaNF-YA15	TCA-element	CCATCTTTTT	457	9	-
ZaNF-YA15	TCA-element	CCATCTTTTT	1247	9	+
ZaNF-YA15	O2-site	GATGATGTGG	403	10	-
ZaNF-YA15	Myb-binding site	CAACAG	671	6	-
ZaNF-YA15	ARE	AAACCA	804	6	-
ZaNF-YA15	ARE	AAACCA	1513	6	-
ZaNF-YA15	ARE	AAACCA	1644	6	-
ZaNF-YA15	CCAAT-box	CAACGG	1713	6	-
ZaNF-YA15	GARE-motif	TCTGTTG	670	7	+
ZaNF-YA15	CGTCA-motif	CGTCA	31	5	+
ZaNF-YA15	Unnamed__1	CGTGG	52	5	+
ZaNF-YA15	Unnamed__1	CGTGG	724	5	+
ZaNF-YA15	MYC	CATGTG	280	6	-
ZaNF-YA15	MYC	CATTTG	860	6	+
ZaNF-YA15	Box 4	ATTAAT	100	6	+
ZaNF-YA15	Box 4	ATTAAT	490	6	+
ZaNF-YA15	Box 4	ATTAAT	1866	6	-
ZaNF-YA15	as-1	TGACG	31	5	-
ZaNF-YA15	AAGAA-motif	gGTAAAGAAA	888	9	-
ZaNF-YA15	AAGAA-motif	GAAAGAA	928	7	-
ZaNF-YA15	AAGAA-motif	GAAAGAA	932	7	-
ZaNF-YA15	AAGAA-motif	GAAAGAA	1786	7	-
ZaNF-YA15	TATA-box	TACATAAA	113	8	+
ZaNF-YA15	TATA-box	ATTATA	217	6	+
ZaNF-YA15	TATA-box	TATATAA	218	7	-
ZaNF-YA15	TATA-box	TATATA	219	6	+
ZaNF-YA15	TATA-box	ATATAT	220	6	+
ZaNF-YA15	TATA-box	TATA	221	4	+
ZaNF-YA15	TATA-box	ATATAA	261	6	+
ZaNF-YA15	TATA-box	TATA	262	4	+
ZaNF-YA15	TATA-box	TATA	312	4	+
ZaNF-YA15	TATA-box	TATA	352	4	+
ZaNF-YA15	TATA-box	ATATAA	389	6	+
ZaNF-YA15	TATA-box	TATA	390	4	+
ZaNF-YA15	TATA-box	ATTATA	453	6	+
ZaNF-YA15	TATA-box	TATAA	454	5	-
ZaNF-YA15	TATA-box	TATA	455	4	+
ZaNF-YA15	TATA-box	TATAA	477	5	-
ZaNF-YA15	TATA-box	TATA	478	4	+
ZaNF-YA15	TATA-box	ATTATA	599	6	+
ZaNF-YA15	TATA-box	TATAA	600	5	-
ZaNF-YA15	TATA-box	TATA	601	4	+
ZaNF-YA15	TATA-box	ATATAT	761	6	+
ZaNF-YA15	TATA-box	TATA	762	4	+
ZaNF-YA15	TATA-box	ATTATA	765	6	+
ZaNF-YA15	TATA-box	TATATAA	766	7	-
ZaNF-YA15	TATA-box	TATATA	767	6	+
ZaNF-YA15	TATA-box	TATA	769	4	+
ZaNF-YA15	TATA-box	TAAAGATT	898	8	-
ZaNF-YA15	TATA-box	TACAAAA	1031	7	-
ZaNF-YA15	TATA-box	TAAAGATT	1083	8	-
ZaNF-YA15	TATA-box	TATAAA	1087	6	-
ZaNF-YA15	TATA-box	TATAA	1088	5	-
ZaNF-YA15	TATA-box	TATA	1089	4	-
ZaNF-YA15	TATA-box	TATAAAT	1173	7	-
ZaNF-YA15	TATA-box	TATAAA	1174	6	-
ZaNF-YA15	TATA-box	TATAA	1175	5	-
ZaNF-YA15	TATA-box	TATA	1176	4	-
ZaNF-YA15	TATA-box	ATTATA	1321	6	+
ZaNF-YA15	TATA-box	TATAA	1322	5	-
ZaNF-YA15	TATA-box	TATA	1323	4	-
ZaNF-YA15	TATA-box	TATAA	1848	5	-
ZaNF-YA15	TATA-box	TATA	1849	4	-
ZaNF-YA15	ABRE	GACACGTACGT	713	10	+
ZaNF-YA15	Unnamed__6	taTAAATATct	743	10	-
ZaNF-YA15	TATA	TATAAAAT	1849	8	+
ZaNF-YA15	TCT-motif	TCTTAC	1167	6	-
ZaNF-YA15	DRE core	GCCGAC	78	6	-
ZaNF-YA15	ERE	ATTTTAAA	467	8	+
ZaNF-YA16	HD-Zip 1	CAAT(A/T)ATTG	630	8.5	+
ZaNF-YA16	P-box	CCTTTTG	1845	7	+
ZaNF-YA16	W box	TTGACC	1280	6	+
ZaNF-YA16	ERE	ATTTTAAA	202	8	+
ZaNF-YA16	ERE	ATTTTAAA	247	8	+
ZaNF-YA16	ERE	ATTTTAAA	1042	8	+
ZaNF-YA16	ERE	ATTTTAAA	1078	8	-
ZaNF-YA16	ERE	ATTTTAAA	1097	8	-
ZaNF-YA16	TATA-box	TATA	40	4	+
ZaNF-YA16	TATA-box	TATA	118	4	+
ZaNF-YA16	TATA-box	TATAA	178	5	-
ZaNF-YA16	TATA-box	TATA	179	4	+
ZaNF-YA16	TATA-box	TATA	294	4	+
ZaNF-YA16	TATA-box	TACAAAA	329	7	+
ZaNF-YA16	TATA-box	TATTTAAA	356	8	+
ZaNF-YA16	TATA-box	TATATA	387	6	+
ZaNF-YA16	TATA-box	ATATAT	388	6	+
ZaNF-YA16	TATA-box	TATATA	389	6	+
ZaNF-YA16	TATA-box	ATATAA	390	6	+
ZaNF-YA16	TATA-box	TATA	391	4	+
ZaNF-YA16	TATA-box	ATATAA	786	6	+
ZaNF-YA16	TATA-box	TATA	787	4	+
ZaNF-YA16	TATA-box	TATTTAAA	1044	8	-
ZaNF-YA16	TATA-box	ATATAA	1299	6	+
ZaNF-YA16	TATA-box	TATA	1300	4	-
ZaNF-YA16	TATA-box	TACAAAA	1515	7	-
ZaNF-YA16	TATA-box	ccTATAAAaa	1726	9	-
ZaNF-YA16	TATA-box	TATAAAA	1768	7	-
ZaNF-YA16	TATA-box	TATAAA	1769	6	-
ZaNF-YA16	TATA-box	TATAA	1770	5	-
ZaNF-YA16	TATA-box	TATA	1771	4	-
ZaNF-YA16	TATA-box	ccTATAAAaa	1825	9	-
ZaNF-YA16	TATA-box	TATAAAT	1826	7	-
ZaNF-YA16	TATA-box	TATAAA	1827	6	-
ZaNF-YA16	TATA-box	TATAA	1828	5	-
ZaNF-YA16	TATA-box	TATA	1829	4	-
ZaNF-YA16	TATA-box	TATAA	1869	5	-
ZaNF-YA16	TATA-box	TATA	1870	4	-
ZaNF-YA16	TATA-box	TATAAA	1973	6	-
ZaNF-YA16	TATA-box	TATAA	1974	5	-
ZaNF-YA16	TATA-box	TATA	1975	4	-
ZaNF-YA16	ABRE	TACGGTC	775	7	-
ZaNF-YA16	Unnamed__6	taTAAATATct	40	10	+
ZaNF-YA16	LTR	CCGAAA	512	6	+
ZaNF-YA16	MYB-like sequence	TAACCA	1227	6	+
ZaNF-YA16	Sp1	GGGCGG	1957	6	+
ZaNF-YA16	AAGAA-motif	gGTAAAGAAA	638	9	+
ZaNF-YA16	AAGAA-motif	GAAAGAA	1411	7	-
ZaNF-YA16	ARE	AAACCA	1698	6	-
ZaNF-YA16	Myb-binding site	CAACAG	1535	6	-
ZaNF-YA16	GT1-motif	GGTTAA	1226	6	-
ZaNF-YA16	GARE-motif	TCTGTTG	1534	7	+
ZaNF-YA16	MYC	CATGTG	759	6	+
ZaNF-YA16	GA-motif	ATAGATAA	339	8	+
ZaNF-YA16	Box 4	ATTAAT	144	6	+
ZaNF-YA16	Box 4	ATTAAT	321	6	+
ZaNF-YA16	Box 4	ATTAAT	1035	6	-
ZaNF-YA16	Box 4	ATTAAT	1252	6	-
ZaNF-YA16	Box 4	ATTAAT	1256	6	-
ZaNF-YA16	Box 4	ATTAAT	1473	6	-
ZaNF-YA16	MRE	AACCTAA	1990	7	-
ZaNF-YA16	TC-rich repeats	ATTCTCTAAC	1868	9	-
ZaNF-YA16	TCA	TCATCTTCAT	891	9	-
ZaNF-YA16	TCA-element	CCATCTTTTT	798	9	-
ZaNF-YA16	TCA-element	CCATCTTTTT	1315	9	-
ZaNF-YA16	TCA-element	CCATCTTTTT	1897	9	+
ZaNF-YA16	STRE	AGGGG	807	5	-
ZaNF-YA16	Myc	TCTCTTA	1336	7	+
ZaNF-YA16	CAAT-box	CAAAT	72	5	+
ZaNF-YA16	CAAT-box	CAAT	105	4	-
ZaNF-YA16	CAAT-box	CAAT	153	4	-
ZaNF-YA16	CAAT-box	CAAT	162	4	-
ZaNF-YA16	CAAT-box	CAAT	171	4	-
ZaNF-YA16	CAAT-box	CAAT	194	4	-
ZaNF-YA16	CAAT-box	CAAT	231	4	-
ZaNF-YA16	CAAT-box	CAAT	274	4	-
ZaNF-YA16	CAAT-box	CAAT	400	4	+
ZaNF-YA16	CAAT-box	CCAAT	537	5	+
ZaNF-YA16	CAAT-box	CAAT	538	4	+
ZaNF-YA16	CAAT-box	CAAT	630	4	+
ZaNF-YA16	CAAT-box	CAAT	635	4	-
ZaNF-YA16	CAAT-box	CAAT	703	4	+
ZaNF-YA16	CAAT-box	CCAAT	771	5	-
ZaNF-YA16	CAAT-box	CAAAT	829	5	-
ZaNF-YA16	CAAT-box	CAAT	835	4	+
ZaNF-YA16	CAAT-box	CAAT	900	4	-
ZaNF-YA16	CAAT-box	CAAT	963	4	+
ZaNF-YA16	CAAT-box	CAAAT	1032	5	+
ZaNF-YA16	CAAT-box	CAAT	1152	4	+
ZaNF-YA16	CAAT-box	CCCAATTT	1157	8	+
ZaNF-YA16	CAAT-box	CCAAT	1158	5	+
ZaNF-YA16	CAAT-box	CAAT	1159	4	+
ZaNF-YA16	CAAT-box	CAAT	1167	4	+
ZaNF-YA16	CAAT-box	CAAT	1454	4	-
ZaNF-YA16	CAAT-box	CAAT	1483	4	-
ZaNF-YA16	CAAT-box	CAAT	1662	4	-
ZaNF-YA16	CAAT-box	CAAT	1718	4	+
ZaNF-YA16	CAAT-box	CCAAT	1731	5	-
ZaNF-YA16	CAAT-box	CAAT	1753	4	+
ZaNF-YA16	CAAT-box	CAAT	1794	4	-
ZaNF-YA16	CAAT-box	CAAAT	1813	5	+
ZaNF-YA16	CAAT-box	CAAT	1835	4	-
ZaNF-YA16	CAAT-box	CAAAT	1858	5	+
ZaNF-YA16	CAAT-box	CAAT	1931	4	+
ZaNF-YA16		motif_sequence	532	4	+
ZaNF-YA16		motif_sequence	582	4	+
ZaNF-YA16		motif_sequence	724	4	+
ZaNF-YA16		motif_sequence	841	4	+
ZaNF-YA16		motif_sequence	1192	4	+
ZaNF-YA16		motif_sequence	1348	4	-
ZaNF-YA16		motif_sequence	1353	4	-
ZaNF-YA16		motif_sequence	1746	4	-
ZaNF-YA16	WUN-motif	AAATTTCTT	1101	9	+
ZaNF-YA16	Myb	TAACTG	589	6	+
ZaNF-YA16	Myb	CAACTG	675	6	-
ZaNF-YA16	Myb	CAACTG	876	6	+
ZaNF-YA16	Myb	CAACTG	1799	6	-
ZaNF-YA16	AT~TATA-box	TATATA	387	6	+
ZaNF-YA16	AT~TATA-box	TATATA	389	6	+
ZaNF-YA16	Unnamed__4	CTCC	863	4	-
ZaNF-YA16	Unnamed__4	CTCC	1308	4	+
ZaNF-YA16	Unnamed__4	CTCC	1567	4	-
ZaNF-YA16	Unnamed__4	CTCC	1574	4	-
ZaNF-YA16	Unnamed__4	CTCC	1620	4	-
ZaNF-YA16	Unnamed__4	CTCC	1643	4	-
ZaNF-YA16	MYB	CAACCA	1133	6	+
ZaNF-YA16	MYB	TAACCA	1227	6	+
ZaNF-YA16	MYB	CAACAG	1535	6	-
ZaNF-YA16	circadian	CAAAGATATC	812	9	-
ZaNF-YA16	MBS	CAACTG	675	6	-
ZaNF-YA16	MBS	CAACTG	876	6	+
ZaNF-YA16	MBS	CAACTG	1799	6	-
ZaNF-YA17	Box II	CCACGTGGC	1819	9	+
ZaNF-YA17	as-1	TGACG	1603	5	+
ZaNF-YA17	Box 4	ATTAAT	313	6	+
ZaNF-YA17	Box 4	ATTAAT	324	6	+
ZaNF-YA17	Box 4	ATTAAT	383	6	+
ZaNF-YA17	Box 4	ATTAAT	400	6	+
ZaNF-YA17	Box 4	ATTAAT	468	6	+
ZaNF-YA17	Box 4	ATTAAT	479	6	+
ZaNF-YA17	Box 4	ATTAAT	536	6	+
ZaNF-YA17	Box 4	ATTAAT	547	6	+
ZaNF-YA17	Box 4	ATTAAT	566	6	+
ZaNF-YA17	Box 4	ATTAAT	577	6	+
ZaNF-YA17	MYC	CATGTG	142	6	-
ZaNF-YA17	MYC	CATGTG	144	6	+
ZaNF-YA17	MYC	CATTTG	179	6	-
ZaNF-YA17	MYC	CATTTG	195	6	+
ZaNF-YA17	Unnamed__1	CGTGG	202	5	+
ZaNF-YA17	Unnamed__1	GAATTTAATTAA	260	11	+
ZaNF-YA17	Unnamed__1	CGTGG	696	5	-
ZaNF-YA17	Unnamed__1	CGTGG	1414	5	-
ZaNF-YA17	Unnamed__1	GCCACGTGGC	1818	9	-
ZaNF-YA17	Unnamed__1	CGTGG	1819	5	-
ZaNF-YA17	Unnamed__1	CGTGG	1822	5	+
ZaNF-YA17	CGTCA-motif	CGTCA	1603	5	-
ZaNF-YA17	GT1-motif	GGTTAA	1165	6	+
ZaNF-YA17	I-box	atGATAAGGTC	936	10	-
ZaNF-YA17	CCAAT-box	CAACGG	1964	6	-
ZaNF-YA17	ARE	AAACCA	23	6	-
ZaNF-YA17	ARE	AAACCA	78	6	-
ZaNF-YA17	ARE	AAACCA	89	6	+
ZaNF-YA17	ARE	AAACCA	1869	6	+
ZaNF-YA17	AP-1	TGAGTTAG	1941	8	+
ZaNF-YA17	TCT-motif	TCTTAC	771	6	+
ZaNF-YA17	TCT-motif	TCTTAC	1845	6	+
ZaNF-YA17	TCT-motif	TCTTAC	1974	6	+
ZaNF-YA17	ABRE2	CCACGTGG	1819	8	-
ZaNF-YA17	TATA-box	TACAAAA	4	7	+
ZaNF-YA17	TATA-box	ATATAT	289	6	+
ZaNF-YA17	TATA-box	TATATA	290	6	+
ZaNF-YA17	TATA-box	ATATAA	291	6	+
ZaNF-YA17	TATA-box	TATA	292	4	+
ZaNF-YA17	TATA-box	ATATAT	387	6	+
ZaNF-YA17	TATA-box	TATA	388	4	+
ZaNF-YA17	TATA-box	ATATAT	396	6	+
ZaNF-YA17	TATA-box	TATA	397	4	+
ZaNF-YA17	TATA-box	ATATAT	781	6	+
ZaNF-YA17	TATA-box	TATATA	782	6	+
ZaNF-YA17	TATA-box	ATATAA	783	6	+
ZaNF-YA17	TATA-box	TATA	784	4	+
ZaNF-YA17	TATA-box	TATA	1212	4	-
ZaNF-YA17	TATA-box	TATA	1315	4	-
ZaNF-YA17	TATA-box	taTATAAAtc	1504	9	-
ZaNF-YA17	TATA-box	TATAAAT	1505	7	-
ZaNF-YA17	TATA-box	TATAAA	1506	6	-
ZaNF-YA17	TATA-box	TATATAA	1507	7	-
ZaNF-YA17	TATA-box	TATATA	1508	6	-
ZaNF-YA17	TATA-box	ATATAT	1509	6	-
ZaNF-YA17	TATA-box	TATA	1510	4	-
ZaNF-YA17	TATA-box	TACAAAA	1569	7	-
ZaNF-YA17	TATA-box	TACAAAA	1574	7	+
ZaNF-YA17	TATA-box	TATACA	1733	6	-
ZaNF-YA17	TATA-box	TATA	1735	4	-
ZaNF-YA17	TATA-box	TATA	1882	4	-
ZaNF-YA17	ABRE	CACGTG	697	6	+
ZaNF-YA17	ABRE	ACGTG	698	5	+
ZaNF-YA17	ABRE	CACGTG	844	6	+
ZaNF-YA17	ABRE	ACGTG	845	5	+
ZaNF-YA17	ABRE	CACGTG	1820	6	-
ZaNF-YA17	ABRE	ACGTG	1821	5	+
ZaNF-YA17	G-Box	CACGTG	697	6	+
ZaNF-YA17	G-Box	CACGTG	844	6	+
ZaNF-YA17	G-Box	CACGTG	1820	6	-
ZaNF-YA17	TGACG-motif	TGACG	1603	5	+
ZaNF-YA17	box S	AGCCACC	116	7	-
ZaNF-YA17	Unnamed__4	CTCC	759	4	+
ZaNF-YA17	Unnamed__4	CTCC	1007	4	+
ZaNF-YA17	Unnamed__4	CTCC	1198	4	+
ZaNF-YA17	AT~TATA-box	TATATA	290	6	+
ZaNF-YA17	AT~TATA-box	TATATA	782	6	+
ZaNF-YA17	AT~TATA-box	TATATAAA	1506	8	-
ZaNF-YA17	AT~TATA-box	TATATA	1508	6	-
ZaNF-YA17	MBS	CAACTG	594	6	+
ZaNF-YA17	TGA-element	AACGAC	302	6	-
ZaNF-YA17	MYB	CAACCA	103	6	-
ZaNF-YA17	MYB	CAACCA	138	6	+
ZaNF-YA17	MYB	CAACCA	722	6	-
ZaNF-YA17	MYB	CAACCA	957	6	-
ZaNF-YA17	O2-site	GATGA(C/T)(A/G)TG(A/G)	1463	8.5	-
ZaNF-YA17	TCA-element	TCAGAAGAGG	1899	9	-
ZaNF-YA17	TCA	TCATCTTCAT	1003	9	+
ZaNF-YA17	TC-rich repeats	ATTCTCTAAC	1620	9	+
ZaNF-YA17	TC-rich repeats	GTTTTCTTAC	1970	9	+
ZaNF-YA17	G-box	CACGTG	697	6	+
ZaNF-YA17	G-box	CACGTG	844	6	+
ZaNF-YA17	G-box	CACGAC	1415	6	+
ZaNF-YA17	G-box	GCCACGTGGA	1818	9	-
ZaNF-YA17	G-box	CACGTG	1820	6	-
ZaNF-YA17	WRE3	CCACCT	100	6	-
ZaNF-YA17	WRE3	CCACCT	115	6	-
ZaNF-YA17	Myb	CAACTG	594	6	+
ZaNF-YA17	Myb	TAACTG	1884	6	+
ZaNF-YA17	MYB recognition site	CCGTTG	1964	6	+
ZaNF-YA17		motif_sequence	186	4	+
ZaNF-YA17		motif_sequence	192	4	-
ZaNF-YA17		motif_sequence	743	4	+
ZaNF-YA17		motif_sequence	888	4	-
ZaNF-YA17		motif_sequence	1005	4	+
ZaNF-YA17		motif_sequence	1181	4	+
ZaNF-YA17		motif_sequence	1395	4	+
ZaNF-YA17	CAAT-box	CCAAT	21	5	-
ZaNF-YA17	CAAT-box	CCAAT	68	5	-
ZaNF-YA17	CAAT-box	TGCCAAC	132	7	+
ZaNF-YA17	CAAT-box	CAAAT	163	5	-
ZaNF-YA17	CAAT-box	CAAAT	179	5	+
ZaNF-YA17	CAAT-box	CAAAT	196	5	-
ZaNF-YA17	CAAT-box	CAAAT	286	5	+
ZaNF-YA17	CAAT-box	CCAAT	374	5	+
ZaNF-YA17	CAAT-box	CAAT	375	4	+
ZaNF-YA17	CAAT-box	CAAAT	417	5	+
ZaNF-YA17	CAAT-box	CAAAT	439	5	+
ZaNF-YA17	CAAT-box	CAAAT	452	5	+
ZaNF-YA17	CAAT-box	CAAAT	476	5	+
ZaNF-YA17	CAAT-box	CAAT	534	4	+
ZaNF-YA17	CAAT-box	CCAAT	753	5	+
ZaNF-YA17	CAAT-box	CAAT	754	4	+
ZaNF-YA17	CAAT-box	CAAT	815	4	-
ZaNF-YA17	CAAT-box	CAAT	822	4	-
ZaNF-YA17	CAAT-box	CCAAT	1048	5	+
ZaNF-YA17	CAAT-box	CAAT	1049	4	+
ZaNF-YA17	CAAT-box	CAAT	1059	4	+
ZaNF-YA17	CAAT-box	CAAT	1066	4	+
ZaNF-YA17	CAAT-box	CCAAT	1074	5	+
ZaNF-YA17	CAAT-box	CAAT	1075	4	+
ZaNF-YA17	CAAT-box	CAAT	1134	4	-
ZaNF-YA17	CAAT-box	CAAAT	1174	5	+
ZaNF-YA17	CAAT-box	CCAAT	1223	5	+
ZaNF-YA17	CAAT-box	CAAT	1224	4	+
ZaNF-YA17	CAAT-box	CAAT	1369	4	+
ZaNF-YA17	CAAT-box	CAAT	1451	4	-
ZaNF-YA17	CAAT-box	CAAT	1474	4	+
ZaNF-YA17	CAAT-box	CAAT	1546	4	+
ZaNF-YA17	CAAT-box	CAAT	1584	4	+
ZaNF-YA17	CAAT-box	CAAT	1620	4	-
ZaNF-YA17	CAAT-box	CAAAT	1717	5	+
ZaNF-YA17	CAAT-box	CCAAT	1753	5	-
ZaNF-YA17	CAAT-box	CCAAT	1774	5	+
ZaNF-YA17	CAAT-box	CAAT	1775	4	+
ZaNF-YA17	CAAT-box	CAAT	1782	4	-
ZaNF-YA17	CAAT-box	CAAT	1827	4	+
ZaNF-YA17	CAAT-box	CAAT	1910	4	-
ZaNF-YA17	CAAT-box	CAAT	1922	4	-
ZaNF-YA17	Myc	TCTCTTA	627	7	-
ZaNF-YA18	ACE	GACACGTATG	516	9	-
ZaNF-YA18	TATA	TATAAAAT	1838	8	-
ZaNF-YA18	ERE	ATTTTAAA	839	8	+
ZaNF-YA18	ERE	ATTTTAAA	937	8	-
ZaNF-YA18	ERE	ATTTTAAA	1099	8	-
ZaNF-YA18	ERE	ATTTTAAA	1226	8	-
ZaNF-YA18	STRE	AGGGG	681	5	+
ZaNF-YA18	STRE	AGGGG	705	5	+
ZaNF-YA18	STRE	AGGGG	714	5	+
ZaNF-YA18	STRE	AGGGG	762	5	+
ZaNF-YA18	STRE	AGGGG	767	5	+
ZaNF-YA18	STRE	AGGGG	777	5	+
ZaNF-YA18	STRE	AGGGG	782	5	+
ZaNF-YA18	STRE	AGGGG	830	5	+
ZaNF-YA18	STRE	AGGGG	1152	5	+
ZaNF-YA18	STRE	AGGGG	1236	5	-
ZaNF-YA18	STRE	AGGGG	1241	5	-
ZaNF-YA18	TATA-box	TATA	622	4	+
ZaNF-YA18	TATA-box	ATATAT	742	6	+
ZaNF-YA18	TATA-box	TATA	743	4	+
ZaNF-YA18	TATA-box	ATATAT	807	6	+
ZaNF-YA18	TATA-box	TATA	808	4	+
ZaNF-YA18	TATA-box	TATAAGAA	864	8	-
ZaNF-YA18	TATA-box	TATAA	867	5	-
ZaNF-YA18	TATA-box	TATA	868	4	+
ZaNF-YA18	TATA-box	TATAAAA	875	7	-
ZaNF-YA18	TATA-box	TATAAA	876	6	-
ZaNF-YA18	TATA-box	TATAA	877	5	-
ZaNF-YA18	TATA-box	TATA	878	4	+
ZaNF-YA18	TATA-box	ATATAA	897	6	+
ZaNF-YA18	TATA-box	TATA	898	4	+
ZaNF-YA18	TATA-box	TATAA	905	5	-
ZaNF-YA18	TATA-box	TATA	906	4	+
ZaNF-YA18	TATA-box	TATAAAT	1068	7	-
ZaNF-YA18	TATA-box	TATAAA	1069	6	-
ZaNF-YA18	TATA-box	TATAA	1070	5	-
ZaNF-YA18	TATA-box	TATA	1071	4	-
ZaNF-YA18	TATA-box	ATTATA	1374	6	+
ZaNF-YA18	TATA-box	TATAA	1375	5	-
ZaNF-YA18	TATA-box	TATA	1376	4	-
ZaNF-YA18	TATA-box	ATTATA	1662	6	+
ZaNF-YA18	TATA-box	TATATAA	1663	7	-
ZaNF-YA18	TATA-box	TATATA	1664	6	-
ZaNF-YA18	TATA-box	ATATAA	1665	6	+
ZaNF-YA18	TATA-box	TATA	1666	4	-
ZaNF-YA18	TATA-box	ATATAT	1671	6	-
ZaNF-YA18	TATA-box	TATATA	1672	6	-
ZaNF-YA18	TATA-box	ATATAT	1673	6	-
ZaNF-YA18	TATA-box	TATA	1674	4	-
ZaNF-YA18	TATA-box	ATTATA	1705	6	+
ZaNF-YA18	TATA-box	TATAA	1706	5	-
ZaNF-YA18	TATA-box	TATA	1707	4	-
ZaNF-YA18	TATA-box	TATATTTATATTT	1714	12	-
ZaNF-YA18	TATA-box	ATTATA	1715	6	+
ZaNF-YA18	TATA-box	TATAA	1716	5	-
ZaNF-YA18	TATA-box	TATA	1717	4	-
ZaNF-YA18	TATA-box	ATATAA	1722	6	+
ZaNF-YA18	TATA-box	TATA	1723	4	-
ZaNF-YA18	TATA-box	ATTATA	1735	6	+
ZaNF-YA18	TATA-box	TATAA	1736	5	-
ZaNF-YA18	TATA-box	TATA	1737	4	-
ZaNF-YA18	TATA-box	TATATTTATATTT	1742	12	-
ZaNF-YA18	TATA-box	ATATAT	1744	6	-
ZaNF-YA18	TATA-box	TATATA	1745	6	-
ZaNF-YA18	TATA-box	ATATAT	1746	6	-
ZaNF-YA18	TATA-box	TATATA	1747	6	-
ZaNF-YA18	TATA-box	ATATAT	1748	6	-
ZaNF-YA18	TATA-box	TATATA	1749	6	-
ZaNF-YA18	TATA-box	ATATAT	1750	6	-
ZaNF-YA18	TATA-box	TATA	1751	4	-
ZaNF-YA18	TATA-box	ATTATA	1754	6	+
ZaNF-YA18	TATA-box	TATAA	1755	5	-
ZaNF-YA18	TATA-box	TATA	1756	4	-
ZaNF-YA18	TATA-box	ATTATA	1807	6	+
ZaNF-YA18	TATA-box	TATAA	1808	5	-
ZaNF-YA18	TATA-box	TATA	1809	4	-
ZaNF-YA18	TATA-box	ATTATA	1821	6	+
ZaNF-YA18	TATA-box	TATAA	1822	5	-
ZaNF-YA18	TATA-box	TATA	1823	4	-
ZaNF-YA18	TATA-box	ATATAT	1834	6	-
ZaNF-YA18	TATA-box	TATA	1835	4	-
ZaNF-YA18	TATA-box	TATAAAA	1839	7	-
ZaNF-YA18	TATA-box	TATAAA	1840	6	-
ZaNF-YA18	TATA-box	TATAA	1841	5	-
ZaNF-YA18	TATA-box	TATA	1842	4	-
ZaNF-YA18	CAAT-box	CAAT	489	4	-
ZaNF-YA18	CAAT-box	CAAAT	536	5	-
ZaNF-YA18	CAAT-box	CAAT	613	4	+
ZaNF-YA18	CAAT-box	CAAT	895	4	+
ZaNF-YA18	CAAT-box	CAAAT	995	5	+
ZaNF-YA18	CAAT-box	CAAAT	1025	5	+
ZaNF-YA18	CAAT-box	CAAT	1031	4	+
ZaNF-YA18	CAAT-box	CAAAT	1039	5	-
ZaNF-YA18	CAAT-box	CCAAT	1163	5	-
ZaNF-YA18	CAAT-box	CAAT	1206	4	-
ZaNF-YA18	CAAT-box	CAAAT	1217	5	+
ZaNF-YA18	CAAT-box	CCAAT	1298	5	-
ZaNF-YA18	CAAT-box	CAAT	1309	4	-
ZaNF-YA18	CAAT-box	CAAAT	1344	5	+
ZaNF-YA18	CAAT-box	CAAAT	1350	5	-
ZaNF-YA18	CAAT-box	CAAAT	1472	5	+
ZaNF-YA18	CAAT-box	CAAAT	1521	5	+
ZaNF-YA18		motif_sequence	481	4	+
ZaNF-YA18		motif_sequence	726	4	-
ZaNF-YA18		motif_sequence	770	4	-
ZaNF-YA18		motif_sequence	785	4	-
ZaNF-YA18		motif_sequence	1123	4	+
ZaNF-YA18		motif_sequence	1184	4	+
ZaNF-YA18	Unnamed__6	taTAAATATct	1666	10	+
ZaNF-YA18	WUN-motif	TAATTACTC	1109	9	+
ZaNF-YA18	MYB recognition site	CCGTTG	1548	6	-
ZaNF-YA18	AT~TATA-box	TATATA	1664	6	-
ZaNF-YA18	AT~TATA-box	TATATA	1672	6	-
ZaNF-YA18	AT~TATA-box	TATATA	1745	6	-
ZaNF-YA18	AT~TATA-box	TATATA	1747	6	-
ZaNF-YA18	AT~TATA-box	TATATA	1749	6	-
ZaNF-YA18	Unnamed__4	CTCC	679	4	-
ZaNF-YA18	Unnamed__4	CTCC	708	4	-
ZaNF-YA18	Unnamed__4	CTCC	712	4	-
ZaNF-YA18	Unnamed__4	CTCC	760	4	-
ZaNF-YA18	Unnamed__4	CTCC	765	4	-
ZaNF-YA18	Unnamed__4	CTCC	770	4	-
ZaNF-YA18	Unnamed__4	CTCC	775	4	-
ZaNF-YA18	Unnamed__4	CTCC	780	4	-
ZaNF-YA18	Unnamed__4	CTCC	785	4	-
ZaNF-YA18	Unnamed__4	CTCC	828	4	-
ZaNF-YA18	Unnamed__4	CTCC	1125	4	+
ZaNF-YA18	Unnamed__4	CTCC	1130	4	+
ZaNF-YA18	Unnamed__4	CTCC	1155	4	-
ZaNF-YA18	Unnamed__4	CTCC	1186	4	+
ZaNF-YA18	Unnamed__4	CTCC	1189	4	+
ZaNF-YA18	Unnamed__4	CTCC	1239	4	+
ZaNF-YA18	Unnamed__4	CTCC	1254	4	+
ZaNF-YA18	Unnamed__4	CTCC	1354	4	-
ZaNF-YA18	Unnamed__4	CTCC	1507	4	+
ZaNF-YA18	Box II	TGGTAATAA	1412	9	-
ZaNF-YA18	CCAAT-box	CAACGG	1548	6	+
ZaNF-YA18	ARE	AAACCA	642	6	+
ZaNF-YA18	MYB	CAACCA	1266	6	+
ZaNF-YA18	MYC	CATTTG	535	6	+
ZaNF-YA18	GC-motif	CCCCCG	1191	6	+
ZaNF-YA19	TATA-box	TATAA	84	5	-
ZaNF-YA19	TATA-box	TATA	85	4	+
ZaNF-YA19	TATA-box	TATAAAA	267	7	-
ZaNF-YA19	TATA-box	TATAAA	268	6	-
ZaNF-YA19	TATA-box	TATAA	269	5	-
ZaNF-YA19	TATA-box	TATA	270	4	+
ZaNF-YA19	TATA-box	taTATAAAtc	292	9	-
ZaNF-YA19	TATA-box	TATAAAT	293	7	-
ZaNF-YA19	TATA-box	TATAAA	294	6	-
ZaNF-YA19	TATA-box	TATATAA	295	7	-
ZaNF-YA19	TATA-box	TATATA	296	6	+
ZaNF-YA19	TATA-box	TATA	298	4	+
ZaNF-YA19	TATA-box	TATTTAAA	307	8	-
ZaNF-YA19	TATA-box	TATTTAAA	332	8	-
ZaNF-YA19	TATA-box	ATATAT	351	6	+
ZaNF-YA19	TATA-box	TATA	352	4	+
ZaNF-YA19	TATA-box	TATAAAA	436	7	-
ZaNF-YA19	TATA-box	TATAAA	437	6	-
ZaNF-YA19	TATA-box	TATAA	438	5	-
ZaNF-YA19	TATA-box	TATA	439	4	+
ZaNF-YA19	TATA-box	TATACA	452	6	-
ZaNF-YA19	TATA-box	TATA	454	4	+
ZaNF-YA19	TATA-box	ATATAT	518	6	+
ZaNF-YA19	TATA-box	TATA	519	4	+
ZaNF-YA19	TATA-box	ATTATA	549	6	+
ZaNF-YA19	TATA-box	TATAA	550	5	-
ZaNF-YA19	TATA-box	TATA	551	4	+
ZaNF-YA19	TATA-box	TATA	594	4	+
ZaNF-YA19	TATA-box	TATACA	723	6	-
ZaNF-YA19	TATA-box	TATA	725	4	+
ZaNF-YA19	TATA-box	TATA	754	4	+
ZaNF-YA19	TATA-box	TATAAAA	765	7	-
ZaNF-YA19	TATA-box	TATAAA	766	6	-
ZaNF-YA19	TATA-box	TATAA	767	5	-
ZaNF-YA19	TATA-box	TATA	768	4	+
ZaNF-YA19	TATA-box	TATACA	804	6	-
ZaNF-YA19	TATA-box	TATA	806	4	+
ZaNF-YA19	TATA-box	taTATAAAtc	956	9	+
ZaNF-YA19	TATA-box	ATATAA	977	6	+
ZaNF-YA19	TATA-box	TATA	978	4	+
ZaNF-YA19	TATA-box	ATTATA	986	6	+
ZaNF-YA19	TATA-box	TATATAA	987	7	-
ZaNF-YA19	TATA-box	TATATA	988	6	+
ZaNF-YA19	TATA-box	ATATAT	989	6	+
ZaNF-YA19	TATA-box	TATATA	990	6	+
ZaNF-YA19	TATA-box	ATATAT	991	6	+
ZaNF-YA19	TATA-box	TATATA	992	6	+
ZaNF-YA19	TATA-box	ATATAT	993	6	+
ZaNF-YA19	TATA-box	TATATA	994	6	+
ZaNF-YA19	TATA-box	ATATAT	995	6	+
ZaNF-YA19	TATA-box	TATATA	996	6	+
ZaNF-YA19	TATA-box	ATATAT	997	6	+
ZaNF-YA19	TATA-box	TATATA	998	6	+
ZaNF-YA19	TATA-box	ATATAA	999	6	+
ZaNF-YA19	TATA-box	TATA	1000	4	-
ZaNF-YA19	TATA-box	TATAAAA	1009	7	-
ZaNF-YA19	TATA-box	TATAAA	1010	6	-
ZaNF-YA19	TATA-box	TATATAA	1011	7	-
ZaNF-YA19	TATA-box	TATATA	1012	6	-
ZaNF-YA19	TATA-box	ATATAT	1013	6	-
ZaNF-YA19	TATA-box	TATA	1014	4	-
ZaNF-YA19	TATA-box	TATAAAT	1214	7	-
ZaNF-YA19	TATA-box	TATAAA	1215	6	-
ZaNF-YA19	TATA-box	TATAA	1216	5	-
ZaNF-YA19	TATA-box	TATA	1217	4	-
ZaNF-YA19	TATA-box	TATA	1395	4	-
ZaNF-YA19	TATA-box	TACAAAA	1553	7	-
ZaNF-YA19	TATA-box	TACAAAA	1584	7	-
ZaNF-YA19	TATA-box	TATAA	1896	5	-
ZaNF-YA19	TATA-box	TATA	1897	4	-
ZaNF-YA19	TATA-box	TATAA	1974	5	-
ZaNF-YA19	TATA-box	TATA	1975	4	-
ZaNF-YA19	ABRE	AACCCGG	948	7	-
ZaNF-YA19	LTR	CCGAAA	1560	6	-
ZaNF-YA19	TATA	TATAAAAT	768	8	+
ZaNF-YA19	TATA	TATAAAAT	1008	8	-
ZaNF-YA19	W box	TTGACC	1947	6	-
ZaNF-YA19	ATCT-motif	AATCTAATCC	1987	9	-
ZaNF-YA19	ERE	ATTTTAAA	742	8	-
ZaNF-YA19	ERE	ATTTTAAA	1091	8	+
ZaNF-YA19	Myb-binding site	CAACAG	108	6	-
ZaNF-YA19	Myb-binding site	CAACAG	1573	6	-
ZaNF-YA19	ARE	AAACCA	1	6	+
ZaNF-YA19	ARE	AAACCA	1500	6	-
ZaNF-YA19	ARE	AAACCA	1888	6	+
ZaNF-YA19	ARE	AAACCA	1923	6	-
ZaNF-YA19	GARE-motif	TCTGTTG	1572	7	+
ZaNF-YA19	CGTCA-motif	CGTCA	1238	5	-
ZaNF-YA19	GT1-motif	GGTTAA	1197	6	-
ZaNF-YA19	Unnamed__1	CGTGG	4	5	-
ZaNF-YA19	Unnamed__1	CGTGG	1156	5	-
ZaNF-YA19	MYC	CATTTG	77	6	+
ZaNF-YA19	MYC	CATTTG	118	6	-
ZaNF-YA19	MYC	CATGTG	613	6	+
ZaNF-YA19	MYC	CAATTG	679	6	+
ZaNF-YA19	MYC	CATGTG	1834	6	+
ZaNF-YA19	MRE	AACCTAA	1990	7	-
ZaNF-YA19	Box 4	ATTAAT	572	6	+
ZaNF-YA19	as-1	TGACG	1238	5	+
ZaNF-YA19	Unnamed__2	AACCTAACCT	1098	9	+
ZaNF-YA19	GATA-motif	AAGATAAGATT	647	10	-
ZaNF-YA19	WUN-motif	TAATTACTC	27	9	+
ZaNF-YA19	WUN-motif	AAATTACTA	562	9	+
ZaNF-YA19		motif_sequence	159	4	-
ZaNF-YA19		motif_sequence	183	4	+
ZaNF-YA19		motif_sequence	364	4	+
ZaNF-YA19		motif_sequence	446	4	-
ZaNF-YA19		motif_sequence	1388	4	-
ZaNF-YA19		motif_sequence	1452	4	+
ZaNF-YA19		motif_sequence	1735	4	-
ZaNF-YA19		motif_sequence	1911	4	-
ZaNF-YA19	CAAT-box	CAAAT	11	5	-
ZaNF-YA19	CAAT-box	CAAAT	63	5	-
ZaNF-YA19	CAAT-box	CAAAT	78	5	-
ZaNF-YA19	CAAT-box	CAAAT	118	5	+
ZaNF-YA19	CAAT-box	CAAT	141	4	+
ZaNF-YA19	CAAT-box	CAAAT	194	5	-
ZaNF-YA19	CAAT-box	CAAT	213	4	+
ZaNF-YA19	CAAT-box	CAAAT	233	5	+
ZaNF-YA19	CAAT-box	CAAT	247	4	+
ZaNF-YA19	CAAT-box	CAAT	285	4	-
ZaNF-YA19	CAAT-box	CAAT	399	4	-
ZaNF-YA19	CAAT-box	CAAAT	418	5	+
ZaNF-YA19	CAAT-box	CCAAT	442	5	-
ZaNF-YA19	CAAT-box	CAAAT	464	5	-
ZaNF-YA19	CAAT-box	CAAT	475	4	-
ZaNF-YA19	CAAT-box	CAAT	493	4	+
ZaNF-YA19	CAAT-box	CAAAT	507	5	+
ZaNF-YA19	CAAT-box	CAAAT	540	5	+
ZaNF-YA19	CAAT-box	CAAT	554	4	-
ZaNF-YA19	CAAT-box	CAAT	619	4	-
ZaNF-YA19	CAAT-box	CAAT	679	4	+
ZaNF-YA19	CAAT-box	CAAT	681	4	-
ZaNF-YA19	CAAT-box	CAAT	685	4	+
ZaNF-YA19	CAAT-box	CCAAT	699	5	-
ZaNF-YA19	CAAT-box	CAAT	721	4	-
ZaNF-YA19	CAAT-box	CAAAT	787	5	-
ZaNF-YA19	CAAT-box	CAAT	802	4	-
ZaNF-YA19	CAAT-box	CAAAT	813	5	+
ZaNF-YA19	CAAT-box	CAAT	850	4	+
ZaNF-YA19	CAAT-box	CAAAT	1211	5	+
ZaNF-YA19	CAAT-box	CAAAT	1277	5	+
ZaNF-YA19	CAAT-box	CAAAT	1341	5	+
ZaNF-YA19	CAAT-box	CAAT	1487	4	+
ZaNF-YA19	CAAT-box	CAAT	1495	4	-
ZaNF-YA19	CAAT-box	CAAT	1513	4	+
ZaNF-YA19	CAAT-box	CAAT	1521	4	-
ZaNF-YA19	CAAT-box	CAAT	1658	4	-
ZaNF-YA19	CAAT-box	CAAT	1663	4	-
ZaNF-YA19	CAAT-box	CAAT	1788	4	+
ZaNF-YA19	CAAT-box	CAAT	1810	4	-
ZaNF-YA19	CAAT-box	CAAAT	1859	5	-
ZaNF-YA19	CAAT-box	CAAT	1950	4	+
ZaNF-YA19	Myb	CAACTG	105	6	+
ZaNF-YA19	Myb	CAACTG	1828	6	-
ZaNF-YA19	TC-rich repeats	ATTCTCTAAC	1319	9	+
ZaNF-YA19	TC-rich repeats	ATTCTCTAAC	1895	9	-
ZaNF-YA19	GCN4_motif	TGAGTCA	1261	7	+
ZaNF-YA19	MYB	CAACAG	108	6	-
ZaNF-YA19	MYB	CAACAG	1573	6	-
ZaNF-YA19	MBS	CAACTG	105	6	+
ZaNF-YA19	MBS	CAACTG	1828	6	-
ZaNF-YA19	AT-rich element	ATAGAAATCAA	1683	11	-
ZaNF-YA19	AT~TATA-box	TATATAAA	294	8	-
ZaNF-YA19	AT~TATA-box	TATATA	296	6	+
ZaNF-YA19	AT~TATA-box	TATATA	988	6	+
ZaNF-YA19	AT~TATA-box	TATATA	990	6	+
ZaNF-YA19	AT~TATA-box	TATATA	992	6	+
ZaNF-YA19	AT~TATA-box	TATATA	994	6	+
ZaNF-YA19	AT~TATA-box	TATATA	996	6	+
ZaNF-YA19	AT~TATA-box	TATATA	998	6	+
ZaNF-YA19	AT~TATA-box	TATATAAA	1010	8	-
ZaNF-YA19	AT~TATA-box	TATATA	1012	6	-
ZaNF-YA19	Unnamed__4	CTCC	19	4	+
ZaNF-YA19	Unnamed__4	CTCC	100	4	+
ZaNF-YA19	Unnamed__4	CTCC	412	4	-
ZaNF-YA19	Unnamed__4	CTCC	430	4	+
ZaNF-YA19	Unnamed__4	CTCC	606	4	+
ZaNF-YA19	Unnamed__4	CTCC	1168	4	+
ZaNF-YA19	Unnamed__4	CTCC	1347	4	+
ZaNF-YA19	Unnamed__4	CTCC	1625	4	-
ZaNF-YA19	Unnamed__4	CTCC	1639	4	-
ZaNF-YA19	TGACG-motif	TGACG	1238	5	+
ZaNF-YA2	GC-motif	CCCCCG	1030	6	-
ZaNF-YA2	TGA-element	AACGAC	1025	6	+
ZaNF-YA2	MBS	CAACTG	604	6	+
ZaNF-YA2	AT1-motif	AATTATTTTTTATT	1451	13	+
ZaNF-YA2	MYB	CAACCA	1111	6	-
ZaNF-YA2	MYB	CAACCA	1748	6	-
ZaNF-YA2	MYB	TAACCA	1862	6	-
ZaNF-YA2	TGACG-motif	TGACG	870	5	+
ZaNF-YA2	TGACG-motif	TGACG	1506	5	+
ZaNF-YA2	Unnamed__4	CTCC	248	4	-
ZaNF-YA2	Unnamed__4	CTCC	667	4	+
ZaNF-YA2	Unnamed__4	CTCC	1086	4	-
ZaNF-YA2	Unnamed__4	CTCC	1119	4	-
ZaNF-YA2	Unnamed__4	CTCC	1160	4	-
ZaNF-YA2	Unnamed__4	CTCC	1218	4	-
ZaNF-YA2	Unnamed__4	CTCC	1225	4	-
ZaNF-YA2	Unnamed__4	CTCC	1245	4	-
ZaNF-YA2	Unnamed__4	CTCC	1248	4	-
ZaNF-YA2	Unnamed__4	CTCC	1610	4	-
ZaNF-YA2	Unnamed__4	CTCC	1791	4	+
ZaNF-YA2	Unnamed__4	CTCC	1840	4	-
ZaNF-YA2	Unnamed__4	CTCC	1873	4	+
ZaNF-YA2	box S	AGCCACC	1255	7	+
ZaNF-YA2	AE-box	AGAAACAA	1766	8	-
ZaNF-YA2	AT-rich element	ATAGAAATCAA	1948	10	-
ZaNF-YA2	AT~TATA-box	TATATA	2	6	+
ZaNF-YA2	AT~TATA-box	TATATA	1358	6	-
ZaNF-YA2	AT~TATA-box	TATATAAA	1408	8	-
ZaNF-YA2	AT~TATA-box	TATATA	1410	6	-
ZaNF-YA2	WRE3	CCACCT	1257	6	+
ZaNF-YA2	WRE3	CCACCT	1875	6	+
ZaNF-YA2	Myb	CAACTG	604	6	+
ZaNF-YA2	CAAT-box	CAAT	124	4	-
ZaNF-YA2	CAAT-box	CAAAT	138	5	-
ZaNF-YA2	CAAT-box	CCAAT	165	5	-
ZaNF-YA2	CAAT-box	CAAAT	179	5	+
ZaNF-YA2	CAAT-box	CAAT	266	4	-
ZaNF-YA2	CAAT-box	CAAT	275	4	-
ZaNF-YA2	CAAT-box	CAAAT	286	5	-
ZaNF-YA2	CAAT-box	CAAT	307	4	+
ZaNF-YA2	CAAT-box	CAAT	336	4	-
ZaNF-YA2	CAAT-box	CAAT	356	4	-
ZaNF-YA2	CAAT-box	CCAAT	452	5	+
ZaNF-YA2	CAAT-box	CAAT	453	4	+
ZaNF-YA2	CAAT-box	CAAAT	455	5	-
ZaNF-YA2	CAAT-box	CAAAT	473	5	-
ZaNF-YA2	CAAT-box	CAAT	509	4	-
ZaNF-YA2	CAAT-box	CAAT	617	4	+
ZaNF-YA2	CAAT-box	CAAAT	805	5	+
ZaNF-YA2	CAAT-box	CAAT	991	4	-
ZaNF-YA2	CAAT-box	CAAAT	1003	5	-
ZaNF-YA2	CAAT-box	CAAT	1020	4	-
ZaNF-YA2	CAAT-box	CAAT	1043	4	-
ZaNF-YA2	CAAT-box	CCAAT	1065	5	-
ZaNF-YA2	CAAT-box	CAAT	1129	4	+
ZaNF-YA2	CAAT-box	CAAT	1201	4	-
ZaNF-YA2	CAAT-box	CCAAT	1242	5	-
ZaNF-YA2	CAAT-box	CAAT	1329	4	-
ZaNF-YA2	CAAT-box	CAAT	1365	4	-
ZaNF-YA2	CAAT-box	CCAAT	1381	5	+
ZaNF-YA2	CAAT-box	CAAT	1382	4	+
ZaNF-YA2	CAAT-box	CAAT	1396	4	+
ZaNF-YA2	CAAT-box	CAAAT	1688	5	-
ZaNF-YA2	CAAT-box	CAAT	1721	4	-
ZaNF-YA2	CAAT-box	CAAT	1725	4	+
ZaNF-YA2	CAAT-box	CAAT	1765	4	-
ZaNF-YA2	CAAT-box	CAAAT	1810	5	-
ZaNF-YA2	CAAT-box	CCAAT	1817	5	-
ZaNF-YA2	CAAT-box	CAAT	1828	4	+
ZaNF-YA2	CAAT-box	CCAAT	1837	5	-
ZaNF-YA2	CAAT-box	CAAT	1891	4	-
ZaNF-YA2	CAAT-box	CAAT	1926	4	-
ZaNF-YA2	WUN-motif	AAATTACT	469	8	-
ZaNF-YA2		motif_sequence	647	4	-
ZaNF-YA2		motif_sequence	901	4	-
ZaNF-YA2		motif_sequence	1086	4	-
ZaNF-YA2		motif_sequence	1119	4	-
ZaNF-YA2		motif_sequence	1225	4	-
ZaNF-YA2		motif_sequence	1674	4	-
ZaNF-YA2		motif_sequence	1730	4	-
ZaNF-YA2		motif_sequence	1975	4	-
ZaNF-YA2	STRE	AGGGG	664	5	-
ZaNF-YA2	GATA-motif	GATAGGG	925	7	-
ZaNF-YA2	TCA	TCATCTTCAT	1084	9	-
ZaNF-YA2	TCA	TCATCTTCAT	1090	9	-
ZaNF-YA2	TCA	TCATCTTCAT	1093	9	-
ZaNF-YA2	TCA	TCATCTTCAT	1096	9	-
ZaNF-YA2	Box 4	ATTAAT	1830	6	-
ZaNF-YA2	MYC	CATTTG	805	6	-
ZaNF-YA2	MYC	CATTTG	1687	6	+
ZaNF-YA2	CGTCA-motif	CGTCA	870	5	-
ZaNF-YA2	CGTCA-motif	CGTCA	1506	5	-
ZaNF-YA2	ARE	AAACCA	55	6	-
ZaNF-YA2	AAGAA-motif	GAAAGAA	375	7	+
ZaNF-YA2	as-1	TGACG	870	5	+
ZaNF-YA2	as-1	TGACG	1506	5	+
ZaNF-YA2	MYB-like sequence	TAACCA	1862	6	-
ZaNF-YA2	chs-CMA1a	TTACTTAA	1662	8	-
ZaNF-YA2	CCGTCC motif	CCGTCC	1793	6	+
ZaNF-YA2	TATA-box	TATATA	2	6	+
ZaNF-YA2	TATA-box	ATATAA	3	6	+
ZaNF-YA2	TATA-box	TATA	4	4	+
ZaNF-YA2	TATA-box	TATACA	277	6	-
ZaNF-YA2	TATA-box	TATA	279	4	+
ZaNF-YA2	TATA-box	TATAA	324	5	-
ZaNF-YA2	TATA-box	TATA	325	4	+
ZaNF-YA2	TATA-box	TATAA	658	5	-
ZaNF-YA2	TATA-box	TATA	659	4	+
ZaNF-YA2	TATA-box	TATTTAAA	742	8	+
ZaNF-YA2	TATA-box	ATATAT	1352	6	-
ZaNF-YA2	TATA-box	TATA	1353	4	-
ZaNF-YA2	TATA-box	ATTATA	1356	6	+
ZaNF-YA2	TATA-box	TATATAA	1357	7	-
ZaNF-YA2	TATA-box	TATATA	1358	6	-
ZaNF-YA2	TATA-box	ATATAA	1359	6	+
ZaNF-YA2	TATA-box	TATA	1360	4	-
ZaNF-YA2	TATA-box	TATAAAA	1407	7	-
ZaNF-YA2	TATA-box	TATAAA	1408	6	-
ZaNF-YA2	TATA-box	TATATAA	1409	7	-
ZaNF-YA2	TATA-box	TATATA	1410	6	-
ZaNF-YA2	TATA-box	ATATAA	1411	6	+
ZaNF-YA2	TATA-box	TATA	1412	4	-
ZaNF-YA2	TATA-box	ATTATA	1427	6	+
ZaNF-YA2	TATA-box	TATAA	1428	5	-
ZaNF-YA2	TATA-box	TATA	1429	4	-
ZaNF-YA2	TATA-box	TATTTAAA	1437	8	+
ZaNF-YA2	TATA-box	TATAAAT	1444	7	-
ZaNF-YA2	TATA-box	TATAAA	1445	6	-
ZaNF-YA2	TATA-box	TATAA	1446	5	-
ZaNF-YA2	TATA-box	TATA	1447	4	-
ZaNF-YA2	TATA-box	TACAAAA	1679	7	-
ZaNF-YA2	TATA-box	TATACA	1752	6	-
ZaNF-YA2	TATA-box	TATA	1754	4	-
ZaNF-YA2	TATA-box	ATATAT	1761	6	-
ZaNF-YA2	TATA-box	TATA	1762	4	-
ZaNF-YA2	CCGTCC-box	CCGTCC	1793	6	+
ZaNF-YA2	ERE	ATTTTAAA	744	8	-
ZaNF-YA2	ERE	ATTTTAAA	1388	8	-
ZaNF-YA2	ATCT-motif	AATCTAATCC	1308	9	+
ZaNF-YA2	W box	TTGACC	304	6	-
ZaNF-YA2	W box	TTGACC	1714	6	-
ZaNF-YA2	TATC-box	TATCCCA	1377	7	+
ZaNF-YA2	chs-CMA2a	TCACTTGA	1647	8	-
ZaNF-YA2	A-box	CCGTCC	1793	6	+
ZaNF-YA2	TCT-motif	TCTTAC	1738	6	-
ZaNF-YA2	TATA	TATAAAAT	1406	8	-
ZaNF-YA20	MYC	CATTTG	648	6	-
ZaNF-YA20	Unnamed__1	CGTGG	777	5	-
ZaNF-YA20	Unnamed__1	CGTGG	1035	5	+
ZaNF-YA20	MRE	AACCTAA	1990	7	-
ZaNF-YA20	Box 4	ATTAAT	727	6	+
ZaNF-YA20	ARE	AAACCA	55	6	-
ZaNF-YA20	ARE	AAACCA	1176	6	+
ZaNF-YA20	ARE	AAACCA	1404	6	-
ZaNF-YA20	ARE	AAACCA	1490	6	-
ZaNF-YA20	Myb-binding site	CAACAG	99	6	-
ZaNF-YA20	Myb-binding site	CAACAG	1482	6	-
ZaNF-YA20	GT1-motif	GGTTAA	40	6	-
ZaNF-YA20	GT1-motif	GGTTAA	1085	6	-
ZaNF-YA20	GT1-motif	GGTTAAT	1632	7	+
ZaNF-YA20	GARE-motif	TCTGTTG	98	7	+
ZaNF-YA20	GARE-motif	TCTGTTG	1481	7	+
ZaNF-YA20	CGTCA-motif	CGTCA	1079	5	+
ZaNF-YA20	Unnamed__2	CCCCGG	489	6	+
ZaNF-YA20	AAGAA-motif	GAAAGAA	1112	7	-
ZaNF-YA20	AAGAA-motif	GAAAGAA	1316	7	-
ZaNF-YA20	as-1	TGACG	1079	5	-
ZaNF-YA20	MYB-like sequence	TAACCA	1086	6	+
ZaNF-YA20	MYB-like sequence	TAACCA	1631	6	-
ZaNF-YA20	ABRE	ACGTG	778	5	-
ZaNF-YA20	TATA-box	TATACA	107	6	-
ZaNF-YA20	TATA-box	TATATA	109	6	+
ZaNF-YA20	TATA-box	ATATAT	110	6	+
ZaNF-YA20	TATA-box	TATATA	111	6	+
ZaNF-YA20	TATA-box	TATA	113	4	+
ZaNF-YA20	TATA-box	ATTATA	168	6	+
ZaNF-YA20	TATA-box	TATAA	169	5	-
ZaNF-YA20	TATA-box	TATA	170	4	+
ZaNF-YA20	TATA-box	TATAA	232	5	-
ZaNF-YA20	TATA-box	TATA	233	4	+
ZaNF-YA20	TATA-box	TATATTTATATTT	250	12	+
ZaNF-YA20	TATA-box	TATAAA	254	6	-
ZaNF-YA20	TATA-box	TATAA	255	5	-
ZaNF-YA20	TATA-box	TATA	256	4	+
ZaNF-YA20	TATA-box	TATA	272	4	+
ZaNF-YA20	TATA-box	TATA	317	4	+
ZaNF-YA20	TATA-box	TATTTAAA	339	8	-
ZaNF-YA20	TATA-box	TATATTTATATTT	408	12	-
ZaNF-YA20	TATA-box	ATATAT	410	6	+
ZaNF-YA20	TATA-box	TATATA	411	6	+
ZaNF-YA20	TATA-box	ATATAT	412	6	+
[truncated: 9,065 more rows]

## Sheet: Statistics
The cis-elements on the promoter of the ZaNF-Y genes using PlantCARE
	Plant growth and development							Response to phytohormone										Abiotic stress
	MSA-like	DRE	HD-Zip 3	Box III	Unnamed__1	CCAAT-box	SUM	ABRE	TGA-element	AuxRR-core	P-box	GARE-motif	TATC-box	CGTCA-motif	TGACG-motif	TCA-element	SUM	LTR	TC-rich repeats	WUN-motif	MBS	MRE	MBSI	SUM
ZaNF-YA1	1				2		3	10			1	1		3	3	1	19		1					1
ZaNF-YA2							0		1				1	2	2		6			1	1			2
ZaNF-YA3					1		1	1	1					3	3		8	1		1		1		3
ZaNF-YA4					1		1	1	1					3	3		8	1		1		1		3
ZaNF-YA5							0				1		1				2		1	1	1			3
ZaNF-YA6					2		2	2			1	1		3	3		10	2	2		1			5
ZaNF-YA7					1	1	2	3	1					4	4	1	13	1	1		1			3
ZaNF-YA8					1		1	1	1			1					3	2	2	2	2	1		9
ZaNF-YA9					2		2	1						1	1	1	4	4						4
ZaNF-YA10							0							2	2	1	5	1	1		2			4
ZaNF-YA11					1		1	3			1			1	1		6	3	1		1			5
ZaNF-YA12		1			1		2									1	1				1	1		2
ZaNF-YA13			1		1	1	3	1	1		2	1		4	4	1	14	1						1
ZaNF-YA14					4		4	7						1	1		9	2			1		1	4
ZaNF-YA15		1			2	1	4	1				1		1	1	2	6			2				2
ZaNF-YA16							0	1			1	1				3	6	1	1	1	3	1		7
ZaNF-YA17					7	1	8	6	1					1	1	1	10		2		1			3
ZaNF-YA18						1	1										0			1				1
ZaNF-YA19					2		2	1				1		1	1		4	1	2	2	2	1		8
ZaNF-YA20					2		2	1				2		1	1	1	6		1			1		2
ZaNF-YB1		1		1	5	1	8	7	2					2	2		13	2		2	2			6
ZaNF-YB2		1			2		3	1				1		1	1		4				1	1		2
ZaNF-YB3					1		1	2									2					2		2
ZaNF-YB4		1			1		2	2									2			1	1	2		4
ZaNF-YB5							0	2			1		1	1	1		6	1		2		2		5
ZaNF-YB6					2	2	4	5			2						7			1				1
ZaNF-YB7		1					1							1	1	1	3			2	1			3
ZaNF-YB8	1				1	1	3	3	1					1	1		6		1		1	1		3
ZaNF-YB9					1		1	1	1		1			2	2		7	1		1				2
ZaNF-YB10					1		1	1			1			2	2		6	2						2
ZaNF-YB11	1	1			1	1	4	5	1					2	2		10			3		1		4
ZaNF-YB12					3		3	9	1								10	1	2		1	1		5
ZaNF-YB13						1	1	6					2	1	1		10	2	1					3
ZaNF-YB14					1		1	6	1	1				3	3		14			2				2
ZaNF-YB15					2		2	1	1	1		1		2	2		8	1		2				3
ZaNF-YB16		1			1	2	4				1						1	2	1		1			4
ZaNF-YB17		2			1		3	2						3	3		8	1			1			2
ZaNF-YB18							0						1	1	1	1	4		2					2
ZaNF-YB19					3		3	3	1	1	1			1	1	1	9		1	3				4
ZaNF-YB20					2		2	8		1	1			3	3		16			1	1	1		3
ZaNF-YB21					4		4	3		1			1				5	1			1			2
ZaNF-YB22					1		1	5						2	2		9	1	1		1	3		6
ZaNF-YB23					1		1	5						2	2		9	1	1		1	3		6
ZaNF-YB24					2		2	1				1		3	3		8	1						1
ZaNF-YB25					4		4	5		1				2	2	1	11			1	2	1		4
ZaNF-YB26					4		4	5	1	1				2	2	1	12		1		2			3
ZaNF-YB27					3		3	3	1	1	1			1	1	1	9		1	2				3
ZaNF-YC28					1		1	4			1	1		2	2		10					1		1
ZaNF-YB29				2			2	1	1				1			2	5	1				2	1	4
ZaNF-YB30					4		4	3	1	1	1			1	1	1	9		1	2				3
ZaNF-YC1							0				1	1					2	2			2	1		5
ZaNF-YC2		1			1		2	1		1	1			1	1	1	6					1		1
ZaNF-YC3		1			1		2			1	1	1	2	3	3		11	2	2		1			5
ZaNF-YC4					2		2	1	1				1			1	4	1			1			2
ZaNF-YC5					5		5	3						1	1	1	6							0
ZaNF-YC6							0	1			1	1	1				4	2			2	1		5
ZaNF-YC7	1	1			1		3	3				1		4	4		12	2				1		3
ZaNF-YC8		1			1		2	1						3	3		7	1				2		3
ZaNF-YC9					2		2	2			3		1			1	7	2				1		3
ZaNF-YC10		1					1	2					2	1	1	1	7		1		2			3
ZaNF-YC11		1				1	2	1			2			1	1		5	1						1
ZaNF-YC12		1					1		1		1		1	1	1	1	6	1			3			4
ZaNF-YC13		1			2		3	2			1			3	3	2	11				3			3
ZaNF-YC14					7		7	4				2		4	4	2	16	2			1			3
ZaNF-YC15					3		3	8	1					2	2	1	14	1	1					2
ZaNF-YC16	1	1			2	3	7	1				1		3	3	2	10	1						1
ZaNF-YC17						1	1	1						1	1		3		1	2	1	1		5
Sum	5	19	1	3	109	18	155	170	23	11	29	20	16	100	100	35	504	56	33	39	50	36	2	216
								ABA	auxin	auxin	Gibberellin	Gibberellin	Gibberellin	JA	JA	SA
