# Supplementary material for: Genome-wide identification and characterization of the NF-Y proteins in Zanthoxylum armatum
Source: PeerJ. 2025 Jun 26;13:e19142. doi: 10.7717/peerj.19142 (PMC12206434; doi:10.7717/peerj.19142)
Supplement: Supplemental Information 5 [file peerj-13-19142-s005.xlsx]

## Sheet: raw data
Sequence ID	Posistion	Strand	Binding sequence	TF family
ZaNF-YA1	332	+	aAATTAttta	AT-Hook
ZaNF-YA1	1307	+	tAATTAattt	AT-Hook
ZaNF-YA1	1307	-	taatTAATTt	AT-Hook
ZaNF-YA1	1369	+	cAATTAtttt	AT-Hook
ZaNF-YA1	1416	-	caaaTAATTt	AT-Hook
ZaNF-YA1	1115	+	agTAATTaat	AT-Hook
ZaNF-YA1	1115	-	agtAATTAat	AT-Hook
ZaNF-YA1	1305	+	gtTAATTaat	AT-Hook
ZaNF-YA1	1309	+	atTAATTttt	AT-Hook
ZaNF-YA1	982	+	aATATAtata	AT-Hook
ZaNF-YA1	982	-	aataTATATa	AT-Hook
ZaNF-YA1	1434	-	aaaaTATATa	AT-Hook
ZaNF-YA1	1626	-	aattTATATt	AT-Hook
ZaNF-YA1	1789	-	aattTATATt	AT-Hook
ZaNF-YA1	441	-	aattATATTg	AT-Hook
ZaNF-YA1	336	-	tatTTAATaa	AT-Hook
ZaNF-YA1	1307	+	taATTAAttt	AT-Hook
ZaNF-YA1	1307	-	taaTTAATtt	AT-Hook
ZaNF-YA1	1421	-	aatTTAATta	AT-Hook
ZaNF-YA1	341	-	aataATAATa	AT-Hook
ZaNF-YA1	344	-	aataATAATg	AT-Hook
ZaNF-YA1	396	-	aataATAATa	AT-Hook
ZaNF-YA1	399	-	aataATAATa	AT-Hook
ZaNF-YA1	402	-	aataATAATa	AT-Hook
ZaNF-YA1	441	+	aATTATattg	AT-Hook
ZaNF-YA1	620	+	gATTATtatg	AT-Hook
ZaNF-YA1	1307	+	tAATTAattt	AT-Hook
ZaNF-YA1	1307	-	taatTAATTt	AT-Hook
ZaNF-YA1	1421	-	aattTAATTa	AT-Hook
ZaNF-YA1	165	-	taaaATATTt	AT-Hook
ZaNF-YA1	167	+	aAATATtttt	AT-Hook
ZaNF-YA1	370	-	aaaaATATTa	AT-Hook
ZaNF-YA1	441	-	aattATATTg	AT-Hook
ZaNF-YA1	1121	+	tAATATtttg	AT-Hook
ZaNF-YA1	194	-	tAATAAattt	AT-Hook
ZaNF-YA1	331	+	gaaaTTATTt	AT-Hook
ZaNF-YA1	391	-	aAATAAataa	AT-Hook
ZaNF-YA1	1406	+	aaatTTATTt	AT-Hook
ZaNF-YA1	1417	-	aAATAAttta	AT-Hook
ZaNF-YA1	1000	+	cacACGTAtc	NAC; NAM
ZaNF-YA1	1003	-	acgTATCTaa	MYB; ARR-B
ZaNF-YA1	1002	-	cacGTATCta	Myb/SANT; MYB; ARR-B
ZaNF-YA1	1552	+	agAGATCtgg	Myb/SANT; MYB; ARR-B
ZaNF-YA1	1552	-	agaGATCTgg	Myb/SANT; MYB; ARR-B
ZaNF-YA1	1937	+	gtaTGATTgg	Homeodomain; bZIP; HD-ZIP
ZaNF-YA1	332	+	aaATTATtta	bZIP; Homeodomain; HD-ZIP
ZaNF-YA1	867	+	tgATTATtgc	bZIP; Homeodomain; HD-ZIP
ZaNF-YA1	1369	+	caATTATttt	bZIP; Homeodomain; HD-ZIP
ZaNF-YA1	13	-	atGACGTgct	bZIP
ZaNF-YA1	297	+	gaaACGTCac	bZIP
ZaNF-YA1	1502	-	atGACGTttc	bZIP
ZaNF-YA1	1002	-	cacgTATCTa	MYB-related
ZaNF-YA1	116	-	caaCTTTTtt	Dof
ZaNF-YA1	186	-	ctaCTTTTta	Dof
ZaNF-YA1	781	-	agaCTTTTta	Dof
ZaNF-YA1	1103	+	aaAAAAGtaa	Dof
ZaNF-YA1	1110	+	taAAAAGtaa	Dof
ZaNF-YA1	1149	+	caAAAAGtga	Dof
ZaNF-YA1	1488	-	taaCTTTTta	Dof
ZaNF-YA1	1072	+	agAGATCcat	GATA; tify
ZaNF-YA1	1552	+	agAGATCtgg	GATA; tify
ZaNF-YA1	1552	-	agaGATCTgg	GATA; tify
ZaNF-YA1	1763	+	tgGATATcat	MYB; G2-like
ZaNF-YA1	1763	-	tggATATCat	MYB; G2-like
ZaNF-YA1	37	-	taAGATTctc	MYB; G2-like
ZaNF-YA1	967	-	aaAGATTttt	MYB; G2-like
ZaNF-YA1	1585	-	agAGATTctc	MYB; G2-like
ZaNF-YA1	331	+	gaaATTATtt	bZIP; Homeodomain; HD-ZIP
ZaNF-YA1	346	-	taATAATgat	bZIP; Homeodomain; HD-ZIP
ZaNF-YA1	413	-	taATAATgag	bZIP; Homeodomain; HD-ZIP
ZaNF-YA1	1965	+	actaTATTCt	Myb/SANT; MYB; G2-like
ZaNF-YA1	329	+	cggaaATTATttaa	Homeodomain; bZIP; HD-ZIP
ZaNF-YA1	864	+	tcttgATTATtgca	Homeodomain; bZIP; HD-ZIP
ZaNF-YA1	1366	+	aatcaATTATttta	Homeodomain; bZIP; HD-ZIP
ZaNF-YA1	1415	-	tcaaATAATttaat	Homeodomain; bZIP; HD-ZIP
ZaNF-YA1	1074	-	agatccattTTTGGaaag	MADS box; MIKC
ZaNF-YA1	745	-	attcTGTTGggt	AP2; B3; RAV
ZaNF-YA1	879	-	ggttTGTTGctt	AP2; B3; RAV
ZaNF-YA1	1167	-	ctttctaaaTATGGattc	MADS box; MIKC
ZaNF-YA1	1167	-	ctttctaaaTATGGattc	MADS box; MIKC
ZaNF-YA1	308	-	ggacgaaATCATagcagca	bZIP; Homeodomain; HD-ZIP
ZaNF-YA1	586	+	cgttgttATGATtaatttc	bZIP; Homeodomain; HD-ZIP
ZaNF-YA1	943	+	aaaagtaATGATttttatt	bZIP; Homeodomain; HD-ZIP
ZaNF-YA1	85	+	taaggaCACGTggagctt	bHLH
ZaNF-YA1	85	-	taaggacACGTGgagctt	bHLH
ZaNF-YA1	252	+	accatcCACGTgtcagta	bHLH
ZaNF-YA1	252	-	accatccACGTGtcagta	bHLH
ZaNF-YA1	1825	+	ttggttCACGTgatttgc	bHLH
ZaNF-YA1	1825	-	ttggttcACGTGatttgc	bHLH
ZaNF-YA1	85	-	taaggacACGTGgagct	bHLH
ZaNF-YA1	86	+	aaggaCACGTggagctt	bHLH
ZaNF-YA1	252	-	accatccACGTGtcagt	bHLH
ZaNF-YA1	253	+	ccatcCACGTgtcagta	bHLH
ZaNF-YA1	1369	+	caaTTATTt	Homeodomain; bZIP; HD-ZIP
ZaNF-YA1	747	+	tcTGTTGggt	AP2; B3; RAV
ZaNF-YA1	1460	+	ttAACGTttc	AP2; B3
ZaNF-YA1	1460	-	ttaACGTTtc	AP2; B3
ZaNF-YA1	670	-	tgTGTTGt	AP2; B3; RAV
ZaNF-YA1	747	-	tcTGTTGg	AP2; B3; RAV
ZaNF-YA1	881	-	ttTGTTGc	AP2; B3; RAV
ZaNF-YA1	1167	-	ctttctaaaTATGGattc	MADS box; MIKC
ZaNF-YA1	130	-	AATTTtttt	AT-Hook
ZaNF-YA1	1312	-	AATTTttaa	AT-Hook
ZaNF-YA1	440	-	aaatTATATt	AT-Hook
ZaNF-YA1	848	-	tgatTATATg	AT-Hook
ZaNF-YA1	980	-	caaaTATATa	AT-Hook
ZaNF-YA1	1434	-	aaaaTATATa	AT-Hook
ZaNF-YA1	174	-	TTTATtttc	AT-Hook
ZaNF-YA1	213	+	aaaaATAAA	AT-Hook
ZaNF-YA1	359	+	accaATAAA	AT-Hook
ZaNF-YA1	363	+	ataaATAAA	AT-Hook
ZaNF-YA1	483	+	tcagATAAA	AT-Hook
ZaNF-YA1	787	-	TTTATttta	AT-Hook
ZaNF-YA1	916	+	gaggATAAA	AT-Hook
ZaNF-YA1	956	-	TTTATtgtt	AT-Hook
ZaNF-YA1	1019	-	TTTATactt	AT-Hook
ZaNF-YA1	1026	-	TTTATtttc	AT-Hook
ZaNF-YA1	1230	-	TTTATctgc	AT-Hook
ZaNF-YA1	1376	-	TTTATtttt	AT-Hook
ZaNF-YA1	1409	-	TTTATttca	AT-Hook
ZaNF-YA1	175	-	TTATTttct	AT-Hook
ZaNF-YA1	788	-	TTATTttac	AT-Hook
ZaNF-YA1	1027	-	TTATTttcc	AT-Hook
ZaNF-YA1	1372	-	TTATTttat	AT-Hook
ZaNF-YA1	1575	-	TTATTttgt	AT-Hook
ZaNF-YA1	120	-	TTTTTttatc	AT-Hook
ZaNF-YA1	527	-	TTTTTggttc	AT-Hook
ZaNF-YA1	171	-	ATTTTtat	AT-Hook
ZaNF-YA1	953	-	ATTTTtat	AT-Hook
ZaNF-YA1	1341	-	ATTTTtat	AT-Hook
ZaNF-YA1	1379	-	ATTTTtat	AT-Hook
ZaNF-YA1	174	-	TTTATttt	AT-Hook
ZaNF-YA1	214	+	aaaATAAA	AT-Hook
ZaNF-YA1	787	-	TTTATttt	AT-Hook
ZaNF-YA1	956	-	TTTATtgt	AT-Hook
ZaNF-YA1	1026	-	TTTATttt	AT-Hook
ZaNF-YA1	1376	-	TTTATttt	AT-Hook
ZaNF-YA1	169	-	ATATTttt	AT-Hook
ZaNF-YA1	370	+	aaaAATAT	AT-Hook
ZaNF-YA1	1433	+	aaaAATAT	AT-Hook
ZaNF-YA1	174	-	ttTATTTt	AT-Hook
ZaNF-YA1	214	+	aAAATAaa	AT-Hook
ZaNF-YA1	787	-	ttTATTTt	AT-Hook
ZaNF-YA1	1026	-	ttTATTTt	AT-Hook
ZaNF-YA1	1376	-	ttTATTTt	AT-Hook
ZaNF-YA1	194	-	TAATAaattt	AT-Hook
ZaNF-YA1	131	-	ATTTTttt	AT-Hook
ZaNF-YA1	211	+	aaaAAAAT	AT-Hook
ZaNF-YA1	537	-	ATTTTttt	AT-Hook
ZaNF-YA1	391	+	AAATAaat	AT-Hook
ZaNF-YA1	1408	-	attTATTT	AT-Hook
ZaNF-YA1	371	+	aaaaTATTAata	AT-Hook
ZaNF-YA1	406	+	ataaTATTAata	AT-Hook
ZaNF-YA1	410	-	tatTAATAatga	AT-Hook
ZaNF-YA1	1118	-	aatTAATAtttt	AT-Hook
ZaNF-YA1	1628	+	tttaTATTAaat	AT-Hook
ZaNF-YA1	159	-	ATTATttaa	AT-Hook
ZaNF-YA1	334	-	ATTATttaa	AT-Hook
ZaNF-YA1	393	+	ataaATAAT	AT-Hook
ZaNF-YA1	442	-	ATTATattg	AT-Hook
ZaNF-YA1	850	-	ATTATatga	AT-Hook
ZaNF-YA1	1371	-	ATTATttta	AT-Hook
ZaNF-YA1	1415	+	tcaaATAAT	AT-Hook
ZaNF-YA1	130	-	aATTTTtt	AT-Hook
ZaNF-YA1	212	+	aaAAAATa	AT-Hook
ZaNF-YA1	369	+	aaAAAATa	AT-Hook
ZaNF-YA1	536	-	cATTTTtt	AT-Hook
ZaNF-YA1	632	-	aATTTTat	AT-Hook
ZaNF-YA1	1319	+	aaAAAATa	AT-Hook
ZaNF-YA1	1373	-	tATTTTat	AT-Hook
ZaNF-YA1	1432	+	aaAAAATa	AT-Hook
ZaNF-YA1	130	-	AATTTtt	AT-Hook
ZaNF-YA1	1312	-	AATTTtt	AT-Hook
ZaNF-YA1	171	-	ATTTTtat	AT-Hook
ZaNF-YA1	953	-	ATTTTtat	AT-Hook
ZaNF-YA1	1341	-	ATTTTtat	AT-Hook
ZaNF-YA1	1379	-	ATTTTtat	AT-Hook
ZaNF-YA1	166	+	aAAATAtt	AT-Hook
ZaNF-YA1	168	-	aaTATTTt	AT-Hook
ZaNF-YA1	371	+	aAAATAtt	AT-Hook
ZaNF-YA1	1122	-	aaTATTTt	AT-Hook
ZaNF-YA1	1371	-	atTATTTt	AT-Hook
ZaNF-YA1	90	-	aCACGTg	bHLH
ZaNF-YA1	91	+	cACGTGg	bHLH
ZaNF-YA1	257	-	cCACGTg	bHLH
ZaNF-YA1	258	+	cACGTGt	bHLH
ZaNF-YA1	1830	-	tCACGTg	bHLH
ZaNF-YA1	1831	+	cACGTGa	bHLH
ZaNF-YA1	90	+	aCACGTgg	bHLH
ZaNF-YA1	90	-	acACGTGg	bHLH
ZaNF-YA1	257	+	cCACGTgt	bHLH
ZaNF-YA1	257	-	ccACGTGt	bHLH
ZaNF-YA1	1830	+	tCACGTga	bHLH
ZaNF-YA1	1830	-	tcACGTGa	bHLH
ZaNF-YA1	90	-	aCACGTg	bHLH
ZaNF-YA1	91	+	cACGTGg	bHLH
ZaNF-YA1	257	-	cCACGTg	bHLH
ZaNF-YA1	258	+	cACGTGt	bHLH
ZaNF-YA1	1830	-	tCACGTg	bHLH
ZaNF-YA1	1831	+	cACGTGa	bHLH
ZaNF-YA1	89	+	gaCACGTgga	bHLH
ZaNF-YA1	89	-	gacACGTGga	bHLH
ZaNF-YA1	256	+	tcCACGTgtc	bHLH
ZaNF-YA1	256	-	tccACGTGtc	bHLH
ZaNF-YA1	1829	+	ttCACGTgat	bHLH
ZaNF-YA1	1829	-	ttcACGTGat	bHLH
ZaNF-YA1	89	+	gacACGTGg	bHLH
ZaNF-YA1	90	-	aCACGTgga	bHLH
ZaNF-YA1	256	+	tccACGTGt	bHLH
ZaNF-YA1	257	-	cCACGTgtc	bHLH
ZaNF-YA1	1829	+	ttcACGTGa	bHLH
ZaNF-YA1	1830	-	tCACGTgat	bHLH
ZaNF-YA1	89	+	gaCACGTgga	bHLH
ZaNF-YA1	89	-	gacACGTGga	bHLH
ZaNF-YA1	256	+	tcCACGTgtc	bHLH
ZaNF-YA1	256	-	tccACGTGtc	bHLH
ZaNF-YA1	1829	+	ttCACGTgat	bHLH
ZaNF-YA1	1829	-	ttcACGTGat	bHLH
ZaNF-YA1	87	-	aggaCACGTgga	bHLH
ZaNF-YA1	89	+	gacACGTGgagc	bHLH
ZaNF-YA1	254	-	catcCACGTgtc	bHLH
ZaNF-YA1	256	+	tccACGTGtcag	bHLH
ZaNF-YA1	1827	-	ggttCACGTgat	bHLH
ZaNF-YA1	1829	+	ttcACGTGattt	bHLH
ZaNF-YA1	89	+	gaCACGTgga	bHLH
ZaNF-YA1	89	-	gacACGTGga	bHLH
ZaNF-YA1	256	+	tcCACGTgtc	bHLH
ZaNF-YA1	256	-	tccACGTGtc	bHLH
ZaNF-YA1	1829	+	ttCACGTgat	bHLH
ZaNF-YA1	1829	-	ttcACGTGat	bHLH
ZaNF-YA1	90	-	acACGTGg	bHLH
ZaNF-YA1	257	+	cCACGTgt	bHLH
ZaNF-YA1	1830	+	tCACGTga	bHLH
ZaNF-YA1	1830	-	tcACGTGa	bHLH
ZaNF-YA1	90	+	aCACGTgg	bHLH
ZaNF-YA1	90	-	acACGTGg	bHLH
ZaNF-YA1	257	+	cCACGTgt	bHLH
ZaNF-YA1	257	-	ccACGTGt	bHLH
ZaNF-YA1	1830	+	tCACGTga	bHLH
ZaNF-YA1	1830	-	tcACGTGa	bHLH
ZaNF-YA1	89	+	gaCACGTgga	bHLH
ZaNF-YA1	89	-	gacACGTGga	bHLH
ZaNF-YA1	256	+	tcCACGTgtc	bHLH
ZaNF-YA1	256	-	tccACGTGtc	bHLH
ZaNF-YA1	1829	+	ttCACGTgat	bHLH
ZaNF-YA1	1829	-	ttcACGTGat	bHLH
ZaNF-YA1	89	+	gaCACGTgga	bHLH
ZaNF-YA1	89	-	gacACGTGga	bHLH
ZaNF-YA1	256	+	tcCACGTgtc	bHLH
ZaNF-YA1	256	-	tccACGTGtc	bHLH
ZaNF-YA1	1829	+	ttCACGTgat	bHLH
ZaNF-YA1	1829	-	ttcACGTGat	bHLH
ZaNF-YA1	89	-	gaCACGTgg	bHLH
ZaNF-YA1	90	+	acACGTGga	bHLH
ZaNF-YA1	256	-	tcCACGTgt	bHLH
ZaNF-YA1	257	+	ccACGTGtc	bHLH
ZaNF-YA1	1829	-	ttCACGTga	bHLH
ZaNF-YA1	1830	+	tcACGTGat	bHLH
ZaNF-YA1	88	+	ggaCACGTgg	bHLH
ZaNF-YA1	90	-	acACGTGgag	bHLH
ZaNF-YA1	255	+	atcCACGTgt	bHLH
ZaNF-YA1	257	-	ccACGTGtca	bHLH
ZaNF-YA1	1828	+	gttCACGTga	bHLH
ZaNF-YA1	1830	-	tcACGTGatt	bHLH
ZaNF-YA1	89	+	gaCACGTgga	bHLH
ZaNF-YA1	89	-	gacACGTGga	bHLH
ZaNF-YA1	256	+	tcCACGTgtc	bHLH
ZaNF-YA1	256	-	tccACGTGtc	bHLH
ZaNF-YA1	1829	+	ttCACGTgat	bHLH
ZaNF-YA1	1829	-	ttcACGTGat	bHLH
ZaNF-YA1	87	-	aggaCACGTg	bHLH
ZaNF-YA1	91	+	cACGTGgagc	bHLH
ZaNF-YA1	254	-	catcCACGTg	bHLH
ZaNF-YA1	258	+	cACGTGtcag	bHLH
ZaNF-YA1	1827	-	ggttCACGTg	bHLH
ZaNF-YA1	1831	+	cACGTGattt	bHLH
ZaNF-YA1	14	-	tgaCGTGC	bHLH
ZaNF-YA1	90	+	ACACGtgg	bHLH
ZaNF-YA1	90	-	acaCGTGG	bHLH
ZaNF-YA1	257	+	CCACGtgt	bHLH
ZaNF-YA1	257	-	ccaCGTGT	bHLH
ZaNF-YA1	560	-	gtaAGTGC	bHLH
ZaNF-YA1	1048	-	acaAGTGC	bHLH
ZaNF-YA1	1203	+	GCACTtgt	bHLH
ZaNF-YA1	1250	+	GCACGgac	bHLH
ZaNF-YA1	1522	-	gtcCGTGC	bHLH
ZaNF-YA1	1830	+	TCACGtga	bHLH
ZaNF-YA1	1830	-	tcaCGTGA	bHLH
ZaNF-YA1	89	+	gaCACGTgga	bHLH
ZaNF-YA1	89	-	gacACGTGga	bHLH
ZaNF-YA1	256	+	tcCACGTgtc	bHLH
ZaNF-YA1	256	-	tccACGTGtc	bHLH
ZaNF-YA1	1829	+	ttCACGTgat	bHLH
ZaNF-YA1	1829	-	ttcACGTGat	bHLH
ZaNF-YA1	235	-	gCAAGTagc	bHLH
ZaNF-YA1	1202	+	ggcACTTGt	bHLH
ZaNF-YA1	89	+	gaCACGTgga	bHLH
ZaNF-YA1	89	-	gacACGTGga	bHLH
ZaNF-YA1	256	+	tcCACGTgtc	bHLH
ZaNF-YA1	256	-	tccACGTGtc	bHLH
ZaNF-YA1	1829	+	ttCACGTgat	bHLH
ZaNF-YA1	1829	-	ttcACGTGat	bHLH
ZaNF-YA1	90	+	aCACGTgg	bHLH
ZaNF-YA1	90	-	acACGTGg	bHLH
ZaNF-YA1	257	+	cCACGTgt	bHLH
ZaNF-YA1	257	-	ccACGTGt	bHLH
ZaNF-YA1	1830	+	tCACGTga	bHLH
ZaNF-YA1	1830	-	tcACGTGa	bHLH
ZaNF-YA1	90	-	acaCGTGGa	bZIP
ZaNF-YA1	256	+	tCCACGtgt	bZIP
ZaNF-YA1	86	-	aaggaCACGTgga	bZIP
ZaNF-YA1	89	+	gacACGTGgagct	bZIP
ZaNF-YA1	253	-	ccatcCACGTgtc	bZIP
ZaNF-YA1	256	+	tccACGTGtcagt	bZIP
ZaNF-YA1	997	-	atacaCACGTatc	bZIP
ZaNF-YA1	1826	-	tggttCACGTgat	bZIP
ZaNF-YA1	1829	+	ttcACGTGatttg	bZIP
ZaNF-YA1	88	+	ggaCACGTgga	bZIP
ZaNF-YA1	89	-	gacACGTGgag	bZIP
ZaNF-YA1	255	+	atcCACGTgtc	bZIP
ZaNF-YA1	256	-	tccACGTGtca	bZIP
ZaNF-YA1	1828	+	gttCACGTgat	bZIP
ZaNF-YA1	1829	-	ttcACGTGatt	bZIP
ZaNF-YA1	89	+	gacACGTGga	bZIP
ZaNF-YA1	89	-	gaCACGTgga	bZIP
ZaNF-YA1	256	+	tccACGTGtc	bZIP
ZaNF-YA1	256	-	tcCACGTgtc	bZIP
ZaNF-YA1	1000	-	caCACGTatc	bZIP
ZaNF-YA1	1829	+	ttcACGTGat	bZIP
ZaNF-YA1	1829	-	ttCACGTgat	bZIP
ZaNF-YA1	12	-	gaTGACGtgc	bZIP
ZaNF-YA1	298	+	aaaCGTCAcc	bZIP
ZaNF-YA1	1501	-	aaTGACGttt	bZIP
ZaNF-YA1	88	-	ggaCACGTgg	bZIP
ZaNF-YA1	90	+	acACGTGgag	bZIP
ZaNF-YA1	255	-	atcCACGTgt	bZIP
ZaNF-YA1	257	+	ccACGTGtca	bZIP
ZaNF-YA1	1698	-	acatCTGTCt	bZIP
ZaNF-YA1	12	-	gatgACGTGc	bZIP
ZaNF-YA1	1828	-	gttcACGTGa	bZIP
ZaNF-YA1	1830	+	tCACGTgatt	bZIP
ZaNF-YA1	90	-	acaCGTGGag	bZIP
ZaNF-YA1	255	+	atCCACGtgt	bZIP
ZaNF-YA1	12	-	gatGACGTgc	bZIP
ZaNF-YA1	298	+	aaACGTCacc	bZIP
ZaNF-YA1	1501	-	aatGACGTtt	bZIP
ZaNF-YA1	90	-	acaCGTGGa	bZIP
ZaNF-YA1	256	+	tCCACGtgt	bZIP
ZaNF-YA1	90	+	ACACGtgg	bZIP
ZaNF-YA1	90	-	acaCGTGG	bZIP
ZaNF-YA1	257	+	CCACGtgt	bZIP
ZaNF-YA1	257	-	ccaCGTGT	bZIP
ZaNF-YA1	999	+	ACACAcgt	bZIP
ZaNF-YA1	1001	+	ACACGtat	bZIP
ZaNF-YA1	1001	-	acaCGTAT	bZIP
ZaNF-YA1	1048	+	ACAAGtgc	bZIP
ZaNF-YA1	1203	-	gcaCTTGT	bZIP
ZaNF-YA1	1510	-	tccCGTGT	bZIP
ZaNF-YA1	1830	+	TCACGtga	bZIP
ZaNF-YA1	1830	-	tcaCGTGA	bZIP
ZaNF-YA1	88	+	ggaCACGTgg	bZIP
ZaNF-YA1	90	-	acACGTGgag	bZIP
ZaNF-YA1	255	+	atcCACGTgt	bZIP
ZaNF-YA1	257	-	ccACGTGtca	bZIP
ZaNF-YA1	12	-	gaTGACGtgc	bZIP
ZaNF-YA1	298	+	aaaCGTCAcc	bZIP
ZaNF-YA1	1501	-	aaTGACGttt	bZIP
ZaNF-YA1	13	-	aTGACGtg	bZIP
ZaNF-YA1	299	+	aaCGTCAc	bZIP
ZaNF-YA1	1502	-	aTGACGtt	bZIP
ZaNF-YA1	12	-	gaTGACGtgc	bZIP
ZaNF-YA1	298	+	aaaCGTCAcc	bZIP
ZaNF-YA1	1501	-	aaTGACGttt	bZIP
ZaNF-YA1	11	-	ggatGACGTgct	bZIP
ZaNF-YA1	297	+	gaaACGTCaccg	bZIP
ZaNF-YA1	12	-	gaTGACGtgc	bZIP
ZaNF-YA1	298	+	aaaCGTCAcc	bZIP
ZaNF-YA1	1501	-	aaTGACGttt	bZIP
ZaNF-YA1	90	+	aCACGTgg	bZIP
ZaNF-YA1	90	-	acACGTGg	bZIP
ZaNF-YA1	257	+	cCACGTgt	bZIP
ZaNF-YA1	257	-	ccACGTGt	bZIP
ZaNF-YA1	1001	+	aCACGTat	bZIP
ZaNF-YA1	1830	+	tCACGTga	bZIP
ZaNF-YA1	1830	-	tcACGTGa	bZIP
ZaNF-YA1	88	+	ggaCACGTggag	bZIP
ZaNF-YA1	255	-	atccACGTGtca	bZIP
ZaNF-YA1	425	+	aACACTa	C2H2
ZaNF-YA1	1518	-	cAGTGTc	C2H2
ZaNF-YA1	425	+	aACACTa	C2H2
ZaNF-YA1	1518	-	cAGTGTc	C2H2
ZaNF-YA1	422	+	gataACACTaaaa	C2H2
ZaNF-YA1	172	-	ttTTTATt	CSD
ZaNF-YA1	216	+	aATAAAaa	CSD
ZaNF-YA1	366	+	aATAAAaa	CSD
ZaNF-YA1	379	+	aATAAAaa	CSD
ZaNF-YA1	785	-	ttTTTATt	CSD
ZaNF-YA1	954	-	ttTTTATt	CSD
ZaNF-YA1	196	+	ataAATTTaacta	TCR; CPP
ZaNF-YA1	1401	-	attatAAATTtat	TCR; CPP
ZaNF-YA1	162	+	aTTTAAaa	TCR; CPP
ZaNF-YA1	162	-	atTTAAAa	TCR; CPP
ZaNF-YA1	161	+	tatTTAAAat	TCR
ZaNF-YA1	161	-	taTTTAAaat	TCR
ZaNF-YA1	77	-	atTCAAAc	TCR; CPP
ZaNF-YA1	719	+	gTTTGAat	TCR; CPP
ZaNF-YA1	76	-	aatTCAAAct	TCR; CPP
ZaNF-YA1	718	+	agTTTGAatt	TCR; CPP
ZaNF-YA1	1412	-	attTCAAAta	TCR; CPP
ZaNF-YA1	116	-	caaCTTTTtt	Dof
ZaNF-YA1	186	-	ctaCTTTTta	Dof
ZaNF-YA1	429	+	ctAAAAGtga	Dof
ZaNF-YA1	781	-	agaCTTTTta	Dof
ZaNF-YA1	941	+	agAAAAGtaa	Dof
ZaNF-YA1	1103	+	aaAAAAGtaa	Dof
ZaNF-YA1	1110	+	taAAAAGtaa	Dof
ZaNF-YA1	1149	+	caAAAAGtga	Dof
ZaNF-YA1	1488	-	taaCTTTTta	Dof
ZaNF-YA1	118	-	aCTTTTt	Dof
ZaNF-YA1	188	-	aCTTTTt	Dof
ZaNF-YA1	489	+	aAAAAGc	Dof
ZaNF-YA1	783	-	aCTTTTt	Dof
ZaNF-YA1	1104	+	aAAAAGt	Dof
ZaNF-YA1	1111	+	aAAAAGt	Dof
ZaNF-YA1	1150	+	aAAAAGt	Dof
ZaNF-YA1	1490	-	aCTTTTt	Dof
ZaNF-YA1	105	+	tcAAAAGt	Dof
ZaNF-YA1	118	-	aCTTTTtt	Dof
ZaNF-YA1	188	-	aCTTTTta	Dof
ZaNF-YA1	429	+	ctAAAAGt	Dof
ZaNF-YA1	783	-	aCTTTTta	Dof
ZaNF-YA1	941	+	agAAAAGt	Dof
ZaNF-YA1	1103	+	aaAAAAGt	Dof
ZaNF-YA1	1110	+	taAAAAGt	Dof
ZaNF-YA1	1149	+	caAAAAGt	Dof
ZaNF-YA1	1490	-	aCTTTTta	Dof
ZaNF-YA1	1459	+	ttTAACGt	Dof
ZaNF-YA1	116	-	caaCTTTTt	Dof
ZaNF-YA1	186	-	ctaCTTTTt	Dof
ZaNF-YA1	430	+	tAAAAGtga	Dof
ZaNF-YA1	781	-	agaCTTTTt	Dof
ZaNF-YA1	942	+	gAAAAGtaa	Dof
ZaNF-YA1	1104	+	aAAAAGtaa	Dof
ZaNF-YA1	1111	+	aAAAAGtaa	Dof
ZaNF-YA1	1150	+	aAAAAGtga	Dof
ZaNF-YA1	1488	-	taaCTTTTt	Dof
ZaNF-YA1	118	-	aCTTTTttt	Dof
ZaNF-YA1	188	-	aCTTTTtaa	Dof
ZaNF-YA1	428	+	actAAAAGt	Dof
ZaNF-YA1	783	-	aCTTTTtat	Dof
ZaNF-YA1	1024	-	aCTTTAttt	Dof
ZaNF-YA1	1102	+	aaaAAAAGt	Dof
ZaNF-YA1	1109	+	gtaAAAAGt	Dof
ZaNF-YA1	1148	+	ccaAAAAGt	Dof
ZaNF-YA1	1490	-	aCTTTTtag	Dof
ZaNF-YA1	1603	+	tatTAAAGt	Dof
ZaNF-YA1	116	-	caaCTTTTtt	Dof
ZaNF-YA1	186	-	ctaCTTTTta	Dof
ZaNF-YA1	488	+	taAAAAGctt	Dof
ZaNF-YA1	781	-	agaCTTTTta	Dof
ZaNF-YA1	1103	+	aaAAAAGtaa	Dof
ZaNF-YA1	1110	+	taAAAAGtaa	Dof
ZaNF-YA1	1149	+	caAAAAGtga	Dof
ZaNF-YA1	1488	-	taaCTTTTta	Dof
ZaNF-YA1	456	-	CTTTTtc	Dof
ZaNF-YA1	568	-	CTTTTtc	Dof
ZaNF-YA1	613	-	CTTTTtc	Dof
ZaNF-YA1	548	+	aatTAACGcc	Dof
ZaNF-YA1	1458	+	attTAACGtt	Dof
ZaNF-YA1	1458	+	atttAACGTtt	Dof
ZaNF-YA1	1461	-	taACGTTtctc	Dof
ZaNF-YA1	118	-	aCTTTTtt	Dof
ZaNF-YA1	188	-	aCTTTTta	Dof
ZaNF-YA1	429	+	ctAAAAGt	Dof
ZaNF-YA1	783	-	aCTTTTta	Dof
ZaNF-YA1	941	+	agAAAAGt	Dof
ZaNF-YA1	1103	+	aaAAAAGt	Dof
ZaNF-YA1	1110	+	taAAAAGt	Dof
ZaNF-YA1	1149	+	caAAAAGt	Dof
ZaNF-YA1	1490	-	aCTTTTta	Dof
ZaNF-YA1	1553	+	gaGATCTg	GATA; tify
ZaNF-YA1	1553	-	gAGATCtg	GATA; tify
ZaNF-YA1	1553	+	gAGATCtg	GATA; tify
ZaNF-YA1	1553	-	gaGATCTg	GATA; tify
ZaNF-YA1	1072	+	agAGATCcat	GATA; tify
ZaNF-YA1	1552	+	agAGATCtgg	GATA; tify
ZaNF-YA1	1552	-	agaGATCTgg	GATA; tify
ZaNF-YA1	1073	+	gAGATCcatt	GATA; tify
ZaNF-YA1	1551	-	aagaGATCTg	GATA; tify
ZaNF-YA1	1553	+	gAGATCtggt	GATA; tify
ZaNF-YA1	1552	-	agAGATCtg	GATA; tify
ZaNF-YA1	1553	+	gaGATCTgg	GATA; tify
ZaNF-YA1	1072	+	agAGATCcat	GATA; tify
ZaNF-YA1	1552	+	agAGATCtgg	GATA; tify
ZaNF-YA1	1552	-	agaGATCTgg	GATA; tify
ZaNF-YA1	1551	-	aagAGATCtgg	GATA; tify
ZaNF-YA1	1552	+	agaGATCTggt	GATA; tify
ZaNF-YA1	1551	-	aagaGATCTg	GATA; tify
ZaNF-YA1	1072	-	agAGATCcat	GATA; tify
ZaNF-YA1	1552	+	agaGATCTgg	GATA; tify
ZaNF-YA1	1552	-	agAGATCtgg	GATA; tify
ZaNF-YA1	120	+	tttttttatcaaTTTTTtttt	MADS box; MIKC
ZaNF-YA1	854	+	tATGAAct	Homeodomain
ZaNF-YA1	1386	-	tgTTCATa	Homeodomain
ZaNF-YA1	868	+	gaTTATTgc	Homeodomain; HD-ZIP
ZaNF-YA1	404	-	taaTAATAttaat	Homeodomain
ZaNF-YA1	591	+	ttaTGATTaa	Homeodomain; HD-ZIP
ZaNF-YA1	1937	+	gtaTGATTgg	Homeodomain; HD-ZIP
ZaNF-YA1	591	+	ttaTGATTaa	Homeodomain; HD-ZIP
ZaNF-YA1	1937	+	gtaTGATTgg	Homeodomain; HD-ZIP
ZaNF-YA1	756	+	tTGATTag	Homeodomain; HD-ZIP
ZaNF-YA1	1939	+	aTGATTgg	Homeodomain; HD-ZIP
ZaNF-YA1	374	+	ataTTAATaa	Homeodomain; bZIP; HD-ZIP
ZaNF-YA1	374	-	atATTAAtaa	Homeodomain; bZIP; HD-ZIP
ZaNF-YA1	409	+	ataTTAATaa	Homeodomain; bZIP; HD-ZIP
ZaNF-YA1	409	-	atATTAAtaa	Homeodomain; bZIP; HD-ZIP
ZaNF-YA1	1117	+	taaTTAATat	Homeodomain; bZIP; HD-ZIP
ZaNF-YA1	1117	-	taATTAAtat	Homeodomain; bZIP; HD-ZIP
ZaNF-YA1	140	+	tgaTTAATtga	Homeodomain; HD-ZIP
ZaNF-YA1	594	+	tgaTTAATttc	Homeodomain; HD-ZIP
ZaNF-YA1	1116	-	gtaATTAAtat	Homeodomain; HD-ZIP
ZaNF-YA1	1306	-	ttaATTAAttt	Homeodomain; HD-ZIP
ZaNF-YA1	1307	+	taaTTAATttt	Homeodomain; HD-ZIP
ZaNF-YA1	312	-	gaAATCAtag	Homeodomain; HD-ZIP
ZaNF-YA1	591	+	ttaTGATTaa	Homeodomain; HD-ZIP
ZaNF-YA1	948	+	taaTGATTtt	Homeodomain; HD-ZIP
ZaNF-YA1	1329	-	aaAATCAttt	Homeodomain; HD-ZIP
ZaNF-YA1	1937	+	gtaTGATTgg	Homeodomain; HD-ZIP
ZaNF-YA1	333	+	aATTATtt	Homeodomain; HD-ZIP
ZaNF-YA1	1370	+	aATTATtt	Homeodomain; HD-ZIP
ZaNF-YA1	1417	-	aaATAATt	Homeodomain; HD-ZIP
ZaNF-YA1	1936	+	tgtaTGATTg	Homeodomain; HD-ZIP
ZaNF-YA1	1939	+	aTGATTgg	Homeodomain; WOX
ZaNF-YA1	916	-	gaGGATAaag	Myb/SANT
ZaNF-YA1	1762	-	ttGGATAtca	Myb/SANT
ZaNF-YA1	917	+	aGGATAaa	Myb/SANT
ZaNF-YA1	916	-	gaGGATAaag	Myb/SANT
ZaNF-YA1	39	-	aGATTCtc	Myb/SANT
ZaNF-YA1	1587	-	aGATTCtc	Myb/SANT
ZaNF-YA1	1977	+	ggGAATCt	Myb/SANT
ZaNF-YA1	38	-	aaGATTCtct	Myb/SANT
ZaNF-YA1	1586	-	gaGATTCtct	Myb/SANT
ZaNF-YA1	1976	+	aggGAATCtc	Myb/SANT
ZaNF-YA1	38	-	aaGATTCtct	Myb/SANT
ZaNF-YA1	1586	-	gaGATTCtct	Myb/SANT
ZaNF-YA1	1976	+	aggGAATCtc	Myb/SANT
ZaNF-YA1	1761	+	tttGGATAtca	Myb/SANT
ZaNF-YA1	38	-	aaGATTCtct	Myb/SANT
ZaNF-YA1	1586	-	gaGATTCtct	Myb/SANT
ZaNF-YA1	1976	+	aggGAATCtc	Myb/SANT
ZaNF-YA1	38	-	aAGATTctct	Myb/SANT; MYB; ARR-B
ZaNF-YA1	1586	-	gAGATTctct	Myb/SANT; MYB; ARR-B
ZaNF-YA1	1976	+	agggAATCTc	Myb/SANT; MYB; ARR-B
ZaNF-YA1	1976	+	aggGAATCt	Myb/SANT
ZaNF-YA1	37	-	taaGATTCtc	Myb/SANT
ZaNF-YA1	1585	-	agaGATTCtc	Myb/SANT
ZaNF-YA1	1977	+	ggGAATCtca	Myb/SANT
ZaNF-YA1	38	-	aaGATTCtct	Myb/SANT; ARR-B
ZaNF-YA1	1586	-	gaGATTCtct	Myb/SANT; ARR-B
ZaNF-YA1	1976	+	aggGAATCtc	Myb/SANT; ARR-B
ZaNF-YA1	38	-	aaGATTCtct	Myb/SANT; G2-like
ZaNF-YA1	1586	-	gaGATTCtct	Myb/SANT; G2-like
ZaNF-YA1	1976	+	aggGAATCtc	Myb/SANT; G2-like
ZaNF-YA1	37	-	tAAGATtctc	Myb/SANT; ARR-B
ZaNF-YA1	242	+	gcgaAATCTg	Myb/SANT; ARR-B
ZaNF-YA1	579	-	tAGATTtcgt	Myb/SANT; ARR-B
ZaNF-YA1	1526	+	gtgcAATCTa	Myb/SANT; ARR-B
ZaNF-YA1	1976	+	agggAATCTc	Myb/SANT; ARR-B
ZaNF-YA1	1458	-	attTAACGttt	Myb/SANT; MYB
ZaNF-YA1	38	-	aaGATTCtct	Myb/SANT
ZaNF-YA1	1976	+	aggGAATCtc	Myb/SANT
ZaNF-YA1	858	+	aacTTATCtt	Myb/SANT
ZaNF-YA1	917	-	agGATAAag	Myb/SANT
ZaNF-YA1	166	+	aaAATATttt	Myb/SANT; G2-like; MYB
ZaNF-YA1	166	-	aaaATATTtt	Myb/SANT; G2-like; MYB
ZaNF-YA1	1965	-	actATATTct	Myb/SANT; G2-like; MYB
ZaNF-YA1	1975	+	gaggGAATCt	Myb/SANT
ZaNF-YA1	38	-	aaGATTCtct	Myb/SANT; G2-like
ZaNF-YA1	1976	+	aggGAATCtc	Myb/SANT; G2-like
ZaNF-YA1	916	-	gagGATAAag	Myb/SANT
ZaNF-YA1	858	+	aactTATCTtgat	Myb/SANT; ARR-B
ZaNF-YA1	1002	+	cacgTATCTaatt	Myb/SANT; ARR-B
ZaNF-YA1	38	-	aaGATTCtct	Myb/SANT
ZaNF-YA1	1586	-	gaGATTCtct	Myb/SANT
ZaNF-YA1	1976	+	aggGAATCtc	Myb/SANT
ZaNF-YA1	917	-	aGGATAaag	Myb/SANT
ZaNF-YA1	446	-	taTTGACtt	NAC; NAM
ZaNF-YA1	1989	+	cgGTCAAaa	NAC; NAM
ZaNF-YA1	943	-	aaaAGTAAt	NAC; NAM
ZaNF-YA1	1112	-	aaaAGTAAt	NAC; NAM
ZaNF-YA1	1774	-	ttcAGTAAt	NAC; NAM
ZaNF-YA1	1472	+	taGCGTGt	NAC; NAM
ZaNF-YA1	1471	+	ctaGCGTGt	NAC; NAM
ZaNF-YA1	1470	+	tctaGCGTGt	NAC; NAM
ZaNF-YA1	1470	+	tctaGCGTGt	NAC; NAM
ZaNF-YA1	1470	+	tctaGCGTGt	NAC; NAM
ZaNF-YA1	1470	+	tctaGCGTGt	NAC; NAM
ZaNF-YA1	1472	+	taGCGTGtcc	NAC; NAM
ZaNF-YA1	1422	+	attTAATTat	Sox; YABBY
ZaNF-YA1	1424	-	ttAATTAtaa	Sox; YABBY
ZaNF-YA1	593	-	ATGATta	Sox; YABBY
ZaNF-YA1	1344	-	ttTATAT	TBP
ZaNF-YA1	1628	-	ttTATAT	TBP
ZaNF-YA1	1791	-	ttTATAT	TBP
ZaNF-YA1	982	+	aaTATAT	TBP
ZaNF-YA1	1436	+	aaTATAT	TBP
ZaNF-YA1	1989	+	cgGTCAAa	WRKY
ZaNF-YA1	446	-	taTTGACttt	WRKY
ZaNF-YA1	447	-	aTTGACtt	WRKY
ZaNF-YA1	1989	+	cgGTCAAa	WRKY
ZaNF-YA1	1989	+	cgGTCAAaag	WRKY
ZaNF-YA1	1988	+	acgGTCAAaag	WRKY
ZaNF-YA1	1989	+	cgGTCAAa	WRKY
ZaNF-YA1	1988	+	acgGTCAAaa	WRKY
ZaNF-YA1	445	-	ataTTGACtt	WRKY
ZaNF-YA1	1988	+	acgGTCAAaa	WRKY
ZaNF-YA1	1989	+	cgGTCAAa	WRKY
ZaNF-YA1	1989	+	cgGTCAAaa	WRKY
ZaNF-YA1	1988	+	acgGTCAAaa	WRKY
ZaNF-YA1	1989	+	cgGTCAAa	WRKY
ZaNF-YA1	1988	+	acgGTCAAaa	WRKY
ZaNF-YA1	1989	+	cgGTCAAaa	WRKY
ZaNF-YA1	1167	-	ctttctaaaTATGGattc	MADS box; MIKC
ZaNF-YA1	1074	-	agatccattTTTGGaaag	MADS box; MIKC
ZaNF-YA1	332	-	aaATTATt	Homeodomain; HD-ZIP; bZIP
ZaNF-YA1	1369	-	caATTATt	Homeodomain; HD-ZIP; bZIP
ZaNF-YA1	1418	+	aATAATtt	Homeodomain; HD-ZIP; bZIP
ZaNF-YA1	210	+	gaaaaaaataAAAAAa	AT-Hook
ZaNF-YA1	211	+	aaaaaaataaAAAAAa	AT-Hook
ZaNF-YA1	605	-	tTTTTTctctttttcg	AT-Hook
ZaNF-YA1	1101	+	aaaaaaaagtAAAAAg	AT-Hook
ZaNF-YA1	1318	+	taaaaaatagAAAAAt	AT-Hook
ZaNF-YA1	12	-	gatGACGTgcta	bZIP
ZaNF-YA1	296	+	agaaACGTCacc	bZIP
ZaNF-YA1	1501	-	aatGACGTttcc	bZIP
ZaNF-YA1	1365	-	aaatcaaTTATTt	Homeodomain; HD-ZIP; bZIP
ZaNF-YA1	609	+	ttctcttTTTCG	C2H2
ZaNF-YA1	1264	+	ttttgctTTTCG	C2H2
ZaNF-YA1	1554	-	AGATCtgg	Myb/SANT; ARR-B
ZaNF-YA1	90	-	acACGTGg	bZIP
ZaNF-YA1	257	+	cCACGTgt	bZIP
ZaNF-YA1	14	-	tGACGTg	bZIP
ZaNF-YA1	299	+	aACGTCa	bZIP
ZaNF-YA1	1503	-	tGACGTt	bZIP
ZaNF-YA1	975	+	ttgtacaaaTATATatacata	TBP
ZaNF-YA1	977	+	gtacaaataTATATacatata	TBP
ZaNF-YA1	978	-	tacaaatATATAtacatatat	TBP
ZaNF-YA1	985	+	atatatacaTATATacacacg	TBP
ZaNF-YA1	1429	+	tataaaaaaTATATacttatt	TBP
ZaNF-YA1	88	+	ggacACGTGga	BES1
ZaNF-YA1	89	-	gaCACGTggag	BES1
ZaNF-YA1	255	+	atccACGTGtc	BES1
ZaNF-YA1	256	-	tcCACGTgtca	BES1
ZaNF-YA1	1828	+	gttcACGTGat	BES1
ZaNF-YA1	1829	-	ttCACGTgatt	BES1
ZaNF-YA1	87	+	aggaCACGTggagc	BES1
ZaNF-YA1	87	-	aggacACGTGgagc	BES1
ZaNF-YA1	254	+	catcCACGTgtcag	BES1
ZaNF-YA1	254	-	catccACGTGtcag	BES1
ZaNF-YA1	998	+	tacaCACGTatcta	BES1
ZaNF-YA1	1827	+	ggttCACGTgattt	BES1
ZaNF-YA1	1827	-	ggttcACGTGattt	BES1
ZaNF-YA1	86	+	aaggaCACGTggagct	bZIP
ZaNF-YA1	86	-	aaggacACGTGgagct	bZIP
ZaNF-YA1	253	+	ccatcCACGTgtcagt	bZIP
ZaNF-YA1	253	-	ccatccACGTGtcagt	bZIP
ZaNF-YA1	84	+	ctaaggacACGTGg	bHLH
ZaNF-YA1	90	-	aCACGTggagcttc	bHLH
ZaNF-YA1	251	+	gaccatccACGTGt	bHLH
ZaNF-YA1	257	-	cCACGTgtcagtac	bHLH
ZaNF-YA1	1824	+	tttggttcACGTGa	bHLH
ZaNF-YA1	1830	-	tCACGTgatttgct	bHLH
ZaNF-YA1	120	-	tttttttatcaaTTTTTtttt	MADS box; MIKC
ZaNF-YA1	1075	-	gatccatTTTTGgaa	MADS box; MIKC
ZaNF-YA1	450	-	gacTTTCTttttcgatttctc	MADS box; MIKC
ZaNF-YA1	598	-	taaTTTCTtttttctcttttt	MADS box; MIKC
ZaNF-YA1	605	-	tttTTTCTctttttcgattat	MADS box; MIKC
ZaNF-YA1	1313	+	atttttaaaaaatAGAAAaat	MADS box; MIKC
ZaNF-YA1	88	+	ggaCACGTgg	bHLH
ZaNF-YA1	90	-	acACGTGgag	bHLH
ZaNF-YA1	255	+	atcCACGTgt	bHLH
ZaNF-YA1	257	-	ccACGTGtca	bHLH
ZaNF-YA1	1828	+	gttCACGTga	bHLH
ZaNF-YA1	1830	-	tcACGTGatt	bHLH
ZaNF-YA1	89	+	gaCACGTg	bHLH
ZaNF-YA1	91	-	cACGTGga	bHLH
ZaNF-YA1	256	+	tcCACGTg	bHLH
ZaNF-YA1	258	-	cACGTGtc	bHLH
ZaNF-YA1	1829	+	ttCACGTg	bHLH
ZaNF-YA1	1830	+	tCACGTga	bHLH
ZaNF-YA1	1830	-	tcACGTGa	bHLH
ZaNF-YA1	1077	-	tccatTTTTGg	MADS box; MIKC
ZaNF-YA1	322	-	caGCATGcg	B3
ZaNF-YA1	323	+	agCATGCgg	B3
ZaNF-YA1	322	-	cagCATGCg	B3
ZaNF-YA1	323	+	aGCATGcgg	B3
ZaNF-YA1	90	+	aCACGTgg	bHLH
ZaNF-YA1	90	-	acACGTGg	bHLH
ZaNF-YA1	257	+	cCACGTgt	bHLH
ZaNF-YA1	257	-	ccACGTGt	bHLH
ZaNF-YA1	1830	+	tCACGTga	bHLH
ZaNF-YA1	1830	-	tcACGTGa	bHLH
ZaNF-YA1	90	+	aCACGTgg	bHLH
ZaNF-YA1	90	-	acACGTGg	bHLH
ZaNF-YA1	257	+	cCACGTgt	bHLH
ZaNF-YA1	257	-	ccACGTGt	bHLH
ZaNF-YA1	1830	+	tCACGTga	bHLH
ZaNF-YA1	1830	-	tcACGTGa	bHLH
ZaNF-YA1	90	+	acACGTGg	bHLH
ZaNF-YA1	90	-	aCACGTgg	bHLH
ZaNF-YA1	257	+	ccACGTGt	bHLH
ZaNF-YA1	257	-	cCACGTgt	bHLH
ZaNF-YA1	1830	+	tcACGTGa	bHLH
ZaNF-YA1	1830	-	tCACGTga	bHLH
ZaNF-YA1	81	-	aaactaaggaCACGTggag	bZIP
ZaNF-YA1	88	+	ggacACGTGgagcttcatc	bZIP
ZaNF-YA1	248	-	tctgaccatcCACGTgtca	bZIP
ZaNF-YA1	255	+	atccACGTGtcagtacata	bZIP
ZaNF-YA1	330	-	ggaaaTTATTta	Homeodomain; HD-ZIP; bZIP
ZaNF-YA1	865	-	cttgaTTATTgc	Homeodomain; HD-ZIP; bZIP
ZaNF-YA1	1367	-	atcaaTTATTtt	Homeodomain; HD-ZIP; bZIP
ZaNF-YA1	1416	+	caAATAAtttaa	Homeodomain; HD-ZIP; bZIP
ZaNF-YA1	308	-	ggacgaaATCATagcagca	bZIP; Homeodomain; HD-ZIP
ZaNF-YA1	586	+	cgttgttATGATtaatttc	bZIP; Homeodomain; HD-ZIP
ZaNF-YA1	943	+	aaaagtaATGATttttatt	bZIP; Homeodomain; HD-ZIP
ZaNF-YA1	971	+	atttttGTACAaatat	SBP
ZaNF-YA1	971	-	attttTGTACaaatat	SBP
ZaNF-YA1	1824	-	tttggttcaCGTGA	bHLH
ZaNF-YA1	1830	+	TCACGtgatttgct	bHLH
ZaNF-YA1	745	+	attcTGTTGggt	AP2; B3; RAV
ZaNF-YA1	879	+	ggttTGTTGctt	AP2; B3; RAV
ZaNF-YA1	1167	-	ctttctaaaTATGGattc	MADS box; MIKC
ZaNF-YA1	11	-	ggaTGACGtgc	bZIP
ZaNF-YA1	298	+	aaaCGTCAccg	bZIP
ZaNF-YA1	1500	-	aaaTGACGttt	bZIP
ZaNF-YA1	1985	+	caaacgGTCAA	WRKY
ZaNF-YA1	1074	-	agatccattTTTGGaaag	MADS box; MIKC
ZaNF-YA1	1167	-	ctttctaaaTATGGattc	MADS box; MIKC
ZaNF-YA1	1167	-	ctttctaaaTATGGattc	MADS box; MIKC
ZaNF-YA1	329	-	cggaaaTTATTtaa	Homeodomain; HD-ZIP; bZIP
ZaNF-YA1	864	-	tcttgaTTATTgca	Homeodomain; HD-ZIP; bZIP
ZaNF-YA1	1366	-	aatcaaTTATTtta	Homeodomain; HD-ZIP; bZIP
ZaNF-YA1	1415	+	tcaAATAAtttaat	Homeodomain; HD-ZIP; bZIP
ZaNF-YA1	1369	-	caaTTATTt	Homeodomain; HD-ZIP; bZIP
ZaNF-YA1	308	-	ggacgaaATCATagcagca	bZIP; Homeodomain; HD-ZIP
ZaNF-YA1	586	+	cgttgttATGATtaatttc	bZIP; Homeodomain; HD-ZIP
ZaNF-YA1	943	+	aaaagtaATGATttttatt	bZIP; Homeodomain; HD-ZIP
ZaNF-YA1	85	+	taaggaCACGTggagctt	bHLH
ZaNF-YA1	85	-	taaggacACGTGgagctt	bHLH
ZaNF-YA1	252	+	accatcCACGTgtcagta	bHLH
ZaNF-YA1	252	-	accatccACGTGtcagta	bHLH
ZaNF-YA1	1825	+	ttggttCACGTgatttgc	bHLH
ZaNF-YA1	1825	-	ttggttcACGTGatttgc	bHLH
ZaNF-YA1	85	-	taaggacACGTGgagct	bHLH
ZaNF-YA1	86	+	aaggaCACGTggagctt	bHLH
ZaNF-YA1	252	-	accatccACGTGtcagt	bHLH
ZaNF-YA1	253	+	ccatcCACGTgtcagta	bHLH
ZaNF-YA1	745	+	attcTGTTGggt	AP2; B3; RAV
ZaNF-YA1	879	+	ggttTGTTGctt	AP2; B3; RAV
ZaNF-YA1	1011	-	aattttgaTTTATac	TBP
ZaNF-YA1	1336	-	ttttgattTTTATat	TBP
ZaNF-YA1	1428	+	ttATAAAaaatatat	TBP
ZaNF-YA1	1620	-	ttctgtaaTTTATat	TBP
ZaNF-YA1	1783	-	gcttagaaTTTATat	TBP
ZaNF-YA1	633	-	aTTTTAttga	TBP
ZaNF-YA1	954	-	tTTTTAttgt	TBP
ZaNF-YA1	1092	-	tTTTTAtgga	TBP
ZaNF-YA1	1427	+	attaTAAAAa	TBP
ZaNF-YA1	362	+	aATAAAta	TBP
ZaNF-YA1	392	+	aATAAAta	TBP
ZaNF-YA1	1017	-	gaTTTATa	TBP
ZaNF-YA1	1403	+	tATAAAtt	TBP
ZaNF-YA1	1626	-	aaTTTATa	TBP
ZaNF-YA1	1789	-	aaTTTATa	TBP
ZaNF-YA1	975	+	ttgtacaaaTATATatacata	TBP
ZaNF-YA1	977	+	gtacaaataTATATacatata	TBP
ZaNF-YA1	978	-	tacaaatATATAtacatatat	TBP
ZaNF-YA1	985	+	atatatacaTATATacacacg	TBP
ZaNF-YA1	1429	+	tataaaaaaTATATacttatt	TBP
ZaNF-YA1	1016	-	tgaTTTATact	TBP
ZaNF-YA1	1341	-	attTTTATatt	TBP
ZaNF-YA1	1401	+	attATAAAttt	TBP
ZaNF-YA1	1427	+	attATAAAaaa	TBP
ZaNF-YA1	1625	-	taaTTTATatt	TBP
ZaNF-YA1	1788	-	gaaTTTATatt	TBP
ZaNF-YA1	281	-	taaaCTAACa	MYB
ZaNF-YA1	680	+	tGTTAGtttc	MYB
ZaNF-YA1	1646	+	tatTAGGTgt	MYB; MYB-related
ZaNF-YA1	89	+	gaCACGTgga	bHLH
ZaNF-YA1	89	-	gacACGTGga	bHLH
ZaNF-YA1	256	+	tcCACGTgtc	bHLH
ZaNF-YA1	256	-	tccACGTGtc	bHLH
ZaNF-YA1	11	-	ggaTGACGtg	bZIP
ZaNF-YA1	299	+	aaCGTCAccg	bZIP
ZaNF-YA1	1500	-	aaaTGACGtt	bZIP
ZaNF-YA1	1292	-	ctTAAGGttt	AP2
ZaNF-YA1	1292	-	ctTAAGGttt	AP2
ZaNF-YA1	1939	-	atGATTGgcc	Homeodomain; bZIP; HD-ZIP; WOX
ZaNF-YA1	1115	+	agTAATTaat	Homeodomain; bZIP; HD-ZIP; WOX
ZaNF-YA1	1115	-	agtAATTAat	Homeodomain; bZIP; HD-ZIP; WOX
ZaNF-YA1	1305	+	gtTAATTaat	Homeodomain; bZIP; HD-ZIP; WOX
ZaNF-YA1	1305	-	gttAATTAat	Homeodomain; bZIP; HD-ZIP; WOX
ZaNF-YA1	1423	+	ttTAATTata	Homeodomain; bZIP; HD-ZIP; WOX
ZaNF-YA1	1423	-	tttAATTAta	Homeodomain; bZIP; HD-ZIP; WOX
ZaNF-YA1	1988	+	acgGTCAAaa	WRKY
ZaNF-YA1	590	-	gttATGATta	YABBY
ZaNF-YA1	591	+	ttATGATtaa	Sox; YABBY
ZaNF-YA1	21	+	ctacCACTAt	C2H2
ZaNF-YA1	423	+	ataaCACTAa	C2H2
ZaNF-YA1	609	-	ttcTCTTTtt	Dof
ZaNF-YA1	965	+	aaAAAGAttt	Dof
ZaNF-YA1	1735	-	ctaTCTTTtt	Dof
ZaNF-YA1	1458	-	attTAACGtt	Dof
ZaNF-YA1	36	-	ataagATTCT	HSF
ZaNF-YA1	1131	-	ataatTTTCT	HSF
ZaNF-YA1	1163	-	aaaacTTTCT	HSF
ZaNF-YA1	13	+	ATGACgtgct	bZIP
ZaNF-YA1	1215	+	ATGACtctat	bZIP
ZaNF-YA1	1502	+	ATGACgtttc	bZIP
ZaNF-YA1	88	-	ggacaCGTGG	bZIP
ZaNF-YA1	257	+	CCACGtgtca	bZIP
ZaNF-YA1	947	+	GTAATgatttt	bZIP; Homeodomain; HD-ZIP
ZaNF-YA1	1116	+	GTAATtaatat	bZIP; Homeodomain; HD-ZIP
ZaNF-YA1	1778	+	GTAATgcttag	bZIP; Homeodomain; HD-ZIP
ZaNF-YA1	694	-	ttttgggaaTTGTG	AP2
ZaNF-YA1	1136	+	TTTCTacatttcccaa	(Others)
ZaNF-YA1	1315	-	ttttaaaaaatAGAAA	(Others)
ZaNF-YA1	11	+	GGATG	GATA; tify
ZaNF-YA1	39	+	AGATT	GATA; tify
ZaNF-YA1	103	-	CATCA	GATA; tify
ZaNF-YA1	126	-	TATCA	GATA; tify
ZaNF-YA1	140	+	TGATT	GATA; tify
ZaNF-YA1	157	+	TGATT	GATA; tify
ZaNF-YA1	246	-	AATCT	GATA; tify
ZaNF-YA1	254	-	CATCC	GATA; tify
ZaNF-YA1	314	-	AATCA	GATA; tify
ZaNF-YA1	352	+	TGATA	GATA; tify
ZaNF-YA1	421	+	AGATA	GATA; tify
ZaNF-YA1	462	+	CGATT	GATA; tify
ZaNF-YA1	485	+	AGATA	GATA; tify
ZaNF-YA1	580	+	AGATT	GATA; tify
ZaNF-YA1	594	+	TGATT	GATA; tify
ZaNF-YA1	619	+	CGATT	GATA; tify
ZaNF-YA1	655	+	TGATT	GATA; tify
ZaNF-YA1	677	+	TGATG	GATA; tify
ZaNF-YA1	738	+	CGATT	GATA; tify
ZaNF-YA1	757	+	TGATT	GATA; tify
ZaNF-YA1	766	-	AATCC	GATA; tify
ZaNF-YA1	836	+	TGATT	GATA; tify
ZaNF-YA1	848	+	TGATT	GATA; tify
ZaNF-YA1	862	-	TATCT	GATA; tify
ZaNF-YA1	867	+	TGATT	GATA; tify
ZaNF-YA1	906	+	TGATT	GATA; tify
ZaNF-YA1	918	+	GGATA	GATA; tify
ZaNF-YA1	951	+	TGATT	GATA; tify
ZaNF-YA1	969	+	AGATT	GATA; tify
ZaNF-YA1	1006	-	TATCT	GATA; tify
ZaNF-YA1	1016	+	TGATT	GATA; tify
ZaNF-YA1	1074	+	AGATC	GATA; tify
ZaNF-YA1	1075	-	GATCC	GATA; tify
ZaNF-YA1	1129	+	TGATA	GATA; tify
ZaNF-YA1	1156	+	TGATG	GATA; tify
ZaNF-YA1	1179	+	GGATT	GATA; tify
ZaNF-YA1	1232	-	TATCT	GATA; tify
ZaNF-YA1	1331	-	AATCA	GATA; tify
ZaNF-YA1	1339	+	TGATT	GATA; tify
ZaNF-YA1	1353	+	TGATT	GATA; tify
ZaNF-YA1	1366	-	AATCA	GATA; tify
ZaNF-YA1	1451	+	TGATT	GATA; tify
ZaNF-YA1	1483	-	TATCC	GATA; tify
ZaNF-YA1	1530	-	AATCT	GATA; tify
ZaNF-YA1	1554	+	AGATC	GATA; tify
ZaNF-YA1	1555	-	GATCT	GATA; tify
ZaNF-YA1	1587	+	AGATT	GATA; tify
ZaNF-YA1	1665	+	AGATT	GATA; tify
ZaNF-YA1	1699	-	CATCT	GATA; tify
ZaNF-YA1	1721	-	TATCT	GATA; tify
ZaNF-YA1	1729	+	GGATG	GATA; tify
ZaNF-YA1	1736	-	TATCT	GATA; tify
ZaNF-YA1	1764	+	GGATA	GATA; tify
ZaNF-YA1	1767	-	TATCA	GATA; tify
ZaNF-YA1	1835	+	TGATT	GATA; tify
ZaNF-YA1	1847	-	TATCT	GATA; tify
ZaNF-YA1	1864	+	AGATG	GATA; tify
ZaNF-YA1	1892	+	GGATG	GATA; tify
ZaNF-YA1	1940	+	TGATT	GATA; tify
ZaNF-YA1	1959	+	TGATT	GATA; tify
ZaNF-YA1	1980	-	AATCT	GATA; tify
ZaNF-YA1	64	-	ACCTT	Dof
ZaNF-YA1	86	+	AAGGA	Dof
ZaNF-YA1	108	+	AAAGT	Dof
ZaNF-YA1	118	-	ACTTT	Dof
ZaNF-YA1	188	-	ACTTT	Dof
ZaNF-YA1	290	+	AAGGA	Dof
ZaNF-YA1	432	+	AAAGT	Dof
ZaNF-YA1	451	-	ACTTT	Dof
ZaNF-YA1	455	-	TCTTT	Dof
ZaNF-YA1	473	+	AAAGT	Dof
ZaNF-YA1	491	+	AAAGC	Dof
ZaNF-YA1	499	+	AAAGC	Dof
ZaNF-YA1	566	-	GCCTT	Dof
ZaNF-YA1	567	-	CCTTT	Dof
ZaNF-YA1	603	-	TCTTT	Dof
ZaNF-YA1	612	-	TCTTT	Dof
ZaNF-YA1	774	+	AAAGT	Dof
ZaNF-YA1	783	-	ACTTT	Dof
ZaNF-YA1	801	+	AAAGC	Dof
ZaNF-YA1	922	+	AAAGG	Dof
ZaNF-YA1	923	+	AAGGG	Dof
ZaNF-YA1	944	+	AAAGT	Dof
ZaNF-YA1	967	+	AAAGA	Dof
ZaNF-YA1	1024	-	ACTTT	Dof
ZaNF-YA1	1059	+	AAGGG	Dof
ZaNF-YA1	1067	-	TCCTT	Dof
ZaNF-YA1	1088	+	AAAGT	Dof
ZaNF-YA1	1106	+	AAAGT	Dof
ZaNF-YA1	1113	+	AAAGT	Dof
ZaNF-YA1	1152	+	AAAGT	Dof
ZaNF-YA1	1166	-	ACTTT	Dof
ZaNF-YA1	1195	-	CCCTT	Dof
ZaNF-YA1	1227	-	TCTTT	Dof
ZaNF-YA1	1247	+	AAAGC	Dof
ZaNF-YA1	1268	-	GCTTT	Dof
ZaNF-YA1	1295	+	AAGGT	Dof
ZaNF-YA1	1360	-	TCTTT	Dof
ZaNF-YA1	1490	-	ACTTT	Dof
ZaNF-YA1	1607	+	AAAGT	Dof
ZaNF-YA1	1616	-	CCCTT	Dof
ZaNF-YA1	1617	-	CCTTT	Dof
ZaNF-YA1	1705	-	TCTTT	Dof
ZaNF-YA1	1738	-	TCTTT	Dof
ZaNF-YA1	1758	-	GCTTT	Dof
ZaNF-YA1	1810	-	ACTTT	Dof
ZaNF-YA1	1841	-	GCTTT	Dof
ZaNF-YA1	1899	-	GCTTT	Dof
ZaNF-YA1	1995	+	AAAGG	Dof
ZaNF-YA1	1996	+	AAGGC	Dof
ZaNF-YA1	15	-	GACGT	bZIP
ZaNF-YA1	16	+	ACGTG	bZIP
ZaNF-YA1	91	-	CACGT	bZIP
ZaNF-YA1	92	+	ACGTG	bZIP
ZaNF-YA1	258	-	CACGT	bZIP
ZaNF-YA1	259	+	ACGTG	bZIP
ZaNF-YA1	299	-	AACGT	bZIP
ZaNF-YA1	300	+	ACGTC	bZIP
ZaNF-YA1	1002	-	CACGT	bZIP
ZaNF-YA1	1003	+	ACGTA	bZIP
ZaNF-YA1	1462	-	AACGT	bZIP
ZaNF-YA1	1463	+	ACGTT	bZIP
ZaNF-YA1	1504	-	GACGT	bZIP
ZaNF-YA1	1505	+	ACGTT	bZIP
ZaNF-YA1	1831	-	CACGT	bZIP
ZaNF-YA1	1832	+	ACGTG	bZIP
ZaNF-YA1	29	+	ATTAC	ZF-HD
ZaNF-YA1	74	-	CTAAT	ZF-HD
ZaNF-YA1	142	+	ATTAA	ZF-HD
ZaNF-YA1	143	-	TTAAT	ZF-HD
ZaNF-YA1	159	+	ATTAT	ZF-HD
ZaNF-YA1	193	-	TTAAT	ZF-HD
ZaNF-YA1	334	+	ATTAT	ZF-HD
ZaNF-YA1	339	-	TTAAT	ZF-HD
ZaNF-YA1	342	-	ATAAT	ZF-HD
ZaNF-YA1	345	-	ATAAT	ZF-HD
ZaNF-YA1	348	-	ATAAT	ZF-HD
ZaNF-YA1	376	+	ATTAA	ZF-HD
ZaNF-YA1	377	-	TTAAT	ZF-HD
ZaNF-YA1	397	-	ATAAT	ZF-HD
ZaNF-YA1	400	-	ATAAT	ZF-HD
ZaNF-YA1	403	-	ATAAT	ZF-HD
ZaNF-YA1	406	-	ATAAT	ZF-HD
ZaNF-YA1	411	+	ATTAA	ZF-HD
ZaNF-YA1	412	-	TTAAT	ZF-HD
ZaNF-YA1	415	-	ATAAT	ZF-HD
ZaNF-YA1	442	+	ATTAT	ZF-HD
ZaNF-YA1	549	+	ATTAA	ZF-HD
ZaNF-YA1	596	+	ATTAA	ZF-HD
ZaNF-YA1	597	-	TTAAT	ZF-HD
ZaNF-YA1	621	+	ATTAT	ZF-HD
ZaNF-YA1	624	+	ATTAT	ZF-HD
ZaNF-YA1	759	+	ATTAG	ZF-HD
ZaNF-YA1	822	+	ATTAT	ZF-HD
ZaNF-YA1	838	+	ATTAA	ZF-HD
ZaNF-YA1	850	+	ATTAT	ZF-HD
ZaNF-YA1	869	+	ATTAT	ZF-HD
ZaNF-YA1	937	+	ATTAA	ZF-HD
ZaNF-YA1	947	-	GTAAT	ZF-HD
ZaNF-YA1	1009	-	CTAAT	ZF-HD
ZaNF-YA1	1116	-	GTAAT	ZF-HD
ZaNF-YA1	1119	+	ATTAA	ZF-HD
ZaNF-YA1	1120	-	TTAAT	ZF-HD
ZaNF-YA1	1131	-	ATAAT	ZF-HD
ZaNF-YA1	1185	-	TTAAT	ZF-HD
ZaNF-YA1	1306	-	TTAAT	ZF-HD
ZaNF-YA1	1309	+	ATTAA	ZF-HD
ZaNF-YA1	1310	-	TTAAT	ZF-HD
ZaNF-YA1	1371	+	ATTAT	ZF-HD
ZaNF-YA1	1401	+	ATTAT	ZF-HD
ZaNF-YA1	1419	-	ATAAT	ZF-HD
ZaNF-YA1	1424	-	TTAAT	ZF-HD
ZaNF-YA1	1427	+	ATTAT	ZF-HD
ZaNF-YA1	1604	+	ATTAA	ZF-HD
ZaNF-YA1	1624	-	GTAAT	ZF-HD
ZaNF-YA1	1633	+	ATTAA	ZF-HD
ZaNF-YA1	1647	+	ATTAG	ZF-HD
ZaNF-YA1	1719	+	ATTAT	ZF-HD
ZaNF-YA1	1753	+	ATTAT	ZF-HD
ZaNF-YA1	1778	-	GTAAT	ZF-HD
ZaNF-YA1	125	-	TTATC	GATA; tify
ZaNF-YA1	353	+	GATAA	GATA; tify
ZaNF-YA1	422	+	GATAA	GATA; tify
ZaNF-YA1	486	+	GATAA	GATA; tify
ZaNF-YA1	861	-	TTATC	GATA; tify
ZaNF-YA1	919	+	GATAA	GATA; tify
ZaNF-YA1	1005	-	GTATC	GATA; tify
ZaNF-YA1	1130	+	GATAA	GATA; tify
ZaNF-YA1	1231	-	TTATC	GATA; tify
ZaNF-YA1	1482	-	GTATC	GATA; tify
ZaNF-YA1	1720	-	TTATC	GATA; tify
ZaNF-YA1	1735	-	CTATC	GATA; tify
ZaNF-YA1	1765	+	GATAT	GATA; tify
ZaNF-YA1	1766	-	ATATC	GATA; tify
ZaNF-YA1	1846	-	CTATC	GATA; tify
ZaNF-YA1	57	-	GGTAC	SBP
ZaNF-YA1	58	+	GTACC	SBP
ZaNF-YA1	266	-	AGTAC	SBP
ZaNF-YA1	267	+	GTACA	SBP
ZaNF-YA1	976	-	TGTAC	SBP
ZaNF-YA1	977	+	GTACA	SBP
ZaNF-YA1	14	+	TGACG	Homeodomain; TALE
ZaNF-YA1	250	+	TGACC	Homeodomain; TALE
ZaNF-YA1	262	-	TGTCA	Homeodomain; TALE
ZaNF-YA1	301	-	CGTCA	Homeodomain; TALE
ZaNF-YA1	449	+	TGACT	Homeodomain; TALE
ZaNF-YA1	1216	+	TGACT	Homeodomain; TALE
ZaNF-YA1	1503	+	TGACG	Homeodomain; TALE
ZaNF-YA1	1515	-	TGTCA	Homeodomain; TALE
ZaNF-YA1	1672	-	AGTCA	Homeodomain; TALE
ZaNF-YA1	1990	-	GGTCA	Homeodomain; TALE
ZaNF-YA1	39	+	AGATT	Myb/SANT; MYB; ARR-B;MYB;ARR-B
ZaNF-YA1	246	-	AATCT	Myb/SANT; MYB; ARR-B;MYB;ARR-B
ZaNF-YA1	580	+	AGATT	Myb/SANT; MYB; ARR-B;MYB;ARR-B
ZaNF-YA1	766	-	AATCC	Myb/SANT; MYB; ARR-B;MYB;ARR-B
ZaNF-YA1	969	+	AGATT	Myb/SANT; MYB; ARR-B;MYB;ARR-B
ZaNF-YA1	1179	+	GGATT	Myb/SANT; MYB; ARR-B;MYB;ARR-B
ZaNF-YA1	1530	-	AATCT	Myb/SANT; MYB; ARR-B;MYB;ARR-B
ZaNF-YA1	1587	+	AGATT	Myb/SANT; MYB; ARR-B;MYB;ARR-B
ZaNF-YA1	1665	+	AGATT	Myb/SANT; MYB; ARR-B;MYB;ARR-B
ZaNF-YA1	1980	-	AATCT	Myb/SANT; MYB; ARR-B;MYB;ARR-B
ZaNF-YA1	10	-	TGGAT	AP2; ERF
ZaNF-YA1	31	-	TACAT	AP2; ERF
ZaNF-YA1	34	+	ATATA	AP2; ERF
ZaNF-YA1	38	-	AAGAT	AP2; ERF
ZaNF-YA1	72	+	AACTA	AP2; ERF
ZaNF-YA1	82	+	AACTA	AP2; ERF
ZaNF-YA1	104	+	ATCAA	AP2; ERF
ZaNF-YA1	127	+	ATCAA	AP2; ERF
ZaNF-YA1	139	-	TTGAT	AP2; ERF
ZaNF-YA1	156	-	TTGAT	AP2; ERF
ZaNF-YA1	162	+	ATTTA	AP2; ERF
ZaNF-YA1	180	+	TTCTA	AP2; ERF
ZaNF-YA1	184	+	AACTA	AP2; ERF
ZaNF-YA1	197	-	TAAAT	AP2; ERF
ZaNF-YA1	200	+	ATTTA	AP2; ERF
ZaNF-YA1	204	+	AACTA	AP2; ERF
ZaNF-YA1	247	+	ATCTG	AP2; ERF
ZaNF-YA1	255	+	ATCCA	AP2; ERF
ZaNF-YA1	268	-	TACAT	AP2; ERF
ZaNF-YA1	283	+	AACTA	AP2; ERF
ZaNF-YA1	337	+	ATTTA	AP2; ERF
ZaNF-YA1	364	-	TAAAT	AP2; ERF
ZaNF-YA1	387	+	AACTA	AP2; ERF
ZaNF-YA1	390	-	TAAAT	AP2; ERF
ZaNF-YA1	394	-	TAAAT	AP2; ERF
ZaNF-YA1	420	-	GAGAT	AP2; ERF
ZaNF-YA1	444	-	TATAT	AP2; ERF
ZaNF-YA1	461	-	TCGAT	AP2; ERF
ZaNF-YA1	484	-	CAGAT	AP2; ERF
ZaNF-YA1	543	+	TTCTA	AP2; ERF
ZaNF-YA1	546	-	TAAAT	AP2; ERF
ZaNF-YA1	576	+	ATTTA	AP2; ERF
ZaNF-YA1	579	-	TAGAT	AP2; ERF
ZaNF-YA1	618	-	TCGAT	AP2; ERF
ZaNF-YA1	654	-	TTGAT	AP2; ERF
ZaNF-YA1	683	-	TAGTT	AP2; ERF
ZaNF-YA1	737	-	TCGAT	AP2; ERF
ZaNF-YA1	756	-	TTGAT	AP2; ERF
ZaNF-YA1	761	-	TAGAA	AP2; ERF
ZaNF-YA1	847	-	TTGAT	AP2; ERF
ZaNF-YA1	852	-	TATAT	AP2; ERF
ZaNF-YA1	863	+	ATCTT	AP2; ERF
ZaNF-YA1	866	-	TTGAT	AP2; ERF
ZaNF-YA1	896	-	TACAT	AP2; ERF
ZaNF-YA1	905	-	TTGAT	AP2; ERF
ZaNF-YA1	929	-	TAGAA	AP2; ERF
ZaNF-YA1	968	-	AAGAT	AP2; ERF
ZaNF-YA1	983	+	ATATA	AP2; ERF
ZaNF-YA1	984	-	TATAT	AP2; ERF
ZaNF-YA1	985	+	ATATA	AP2; ERF
ZaNF-YA1	986	-	TATAT	AP2; ERF
ZaNF-YA1	987	+	ATATA	AP2; ERF
ZaNF-YA1	990	-	TACAT	AP2; ERF
ZaNF-YA1	993	+	ATATA	AP2; ERF
ZaNF-YA1	994	-	TATAT	AP2; ERF
ZaNF-YA1	995	+	ATATA	AP2; ERF
ZaNF-YA1	1007	+	ATCTA	AP2; ERF
ZaNF-YA1	1015	-	TTGAT	AP2; ERF
ZaNF-YA1	1018	+	ATTTA	AP2; ERF
ZaNF-YA1	1055	+	CTCTA	AP2; ERF
ZaNF-YA1	1071	-	TAGAG	AP2; ERF
ZaNF-YA1	1073	-	GAGAT	AP2; ERF
ZaNF-YA1	1076	+	ATCCA	AP2; ERF
ZaNF-YA1	1128	-	TTGAT	AP2; ERF
ZaNF-YA1	1137	+	TTCTA	AP2; ERF
ZaNF-YA1	1140	-	TACAT	AP2; ERF
ZaNF-YA1	1169	+	TTCTA	AP2; ERF
ZaNF-YA1	1172	-	TAAAT	AP2; ERF
ZaNF-YA1	1178	-	TGGAT	AP2; ERF
ZaNF-YA1	1219	+	CTCTA	AP2; ERF
ZaNF-YA1	1233	+	ATCTG	AP2; ERF
ZaNF-YA1	1241	+	CTCTA	AP2; ERF
ZaNF-YA1	1244	-	TAGAA	AP2; ERF
ZaNF-YA1	1325	-	TAGAA	AP2; ERF
ZaNF-YA1	1338	-	TTGAT	AP2; ERF
ZaNF-YA1	1346	-	TATAT	AP2; ERF
ZaNF-YA1	1352	-	TTGAT	AP2; ERF
ZaNF-YA1	1364	-	TAAAT	AP2; ERF
ZaNF-YA1	1367	+	ATCAA	AP2; ERF
ZaNF-YA1	1391	+	ATATA	AP2; ERF
ZaNF-YA1	1392	-	TATAT	AP2; ERF
ZaNF-YA1	1395	+	ATGTA	AP2; ERF
ZaNF-YA1	1398	-	TAAAT	AP2; ERF
ZaNF-YA1	1405	-	TAAAT	AP2; ERF
ZaNF-YA1	1408	+	ATTTA	AP2; ERF
ZaNF-YA1	1422	+	ATTTA	AP2; ERF
ZaNF-YA1	1437	+	ATATA	AP2; ERF
ZaNF-YA1	1438	-	TATAT	AP2; ERF
ZaNF-YA1	1439	+	ATATA	AP2; ERF
ZaNF-YA1	1450	-	TTGAT	AP2; ERF
ZaNF-YA1	1458	+	ATTTA	AP2; ERF
ZaNF-YA1	1469	+	CTCTA	AP2; ERF
ZaNF-YA1	1496	-	TAGAA	AP2; ERF
ZaNF-YA1	1531	+	ATCTA	AP2; ERF
ZaNF-YA1	1553	-	GAGAT	AP2; ERF
ZaNF-YA1	1556	+	ATCTG	AP2; ERF
ZaNF-YA1	1586	-	GAGAT	AP2; ERF
ZaNF-YA1	1627	+	ATTTA	AP2; ERF
ZaNF-YA1	1630	-	TATAT	AP2; ERF
ZaNF-YA1	1635	-	TAAAT	AP2; ERF
ZaNF-YA1	1649	-	TAGGT	AP2; ERF
ZaNF-YA1	1664	-	TAGAT	AP2; ERF
ZaNF-YA1	1667	+	ATTTA	AP2; ERF
ZaNF-YA1	1693	+	ATGTA	AP2; ERF
ZaNF-YA1	1700	+	ATCTG	AP2; ERF
ZaNF-YA1	1722	+	ATCTG	AP2; ERF
ZaNF-YA1	1728	-	TGGAT	AP2; ERF
ZaNF-YA1	1737	+	ATCTT	AP2; ERF
ZaNF-YA1	1763	-	TGGAT	AP2; ERF
ZaNF-YA1	1786	-	TAGAA	AP2; ERF
ZaNF-YA1	1790	+	ATTTA	AP2; ERF
ZaNF-YA1	1793	-	TATAT	AP2; ERF
ZaNF-YA1	1821	-	TAGTT	AP2; ERF
ZaNF-YA1	1844	+	TTCTA	AP2; ERF
ZaNF-YA1	1848	+	ATCTT	AP2; ERF
ZaNF-YA1	1859	+	ATTTA	AP2; ERF
ZaNF-YA1	1863	-	AAGAT	AP2; ERF
ZaNF-YA1	1884	-	TATAT	AP2; ERF
ZaNF-YA1	1887	+	ATTTA	AP2; ERF
ZaNF-YA1	1924	+	AGCTA	AP2; ERF
ZaNF-YA1	1961	+	ATTTA	AP2; ERF
ZaNF-YA1	1967	-	TATAT	AP2; ERF
ZaNF-YA1	1981	+	ATCTC	AP2; ERF
ZaNF-YA1	3	-	TGTTG	AP2; RAV; B3
ZaNF-YA1	667	-	TGTTG	AP2; RAV; B3
ZaNF-YA1	672	-	TGTTG	AP2; RAV; B3
ZaNF-YA1	749	-	TGTTG	AP2; RAV; B3
ZaNF-YA1	845	-	TGTTG	AP2; RAV; B3
ZaNF-YA1	883	-	TGTTG	AP2; RAV; B3
ZaNF-YA1	1852	-	TGTTG	AP2; RAV; B3
ZaNF-YA1	24	+	CCACT	NF-YB;NF-YA;NF-YC
ZaNF-YA1	61	+	CCAAC	NF-YB;NF-YA;NF-YC
ZaNF-YA1	74	+	CTAAT	NF-YB;NF-YA;NF-YC
ZaNF-YA1	128	+	TCAAT	NF-YB;NF-YA;NF-YC
ZaNF-YA1	146	-	ATTGA	NF-YB;NF-YA;NF-YC
ZaNF-YA1	152	+	CCATT	NF-YB;NF-YA;NF-YC
ZaNF-YA1	154	-	ATTTG	NF-YB;NF-YA;NF-YC
ZaNF-YA1	360	+	CCAAT	NF-YB;NF-YA;NF-YC
ZaNF-YA1	447	-	ATTGA	NF-YB;NF-YA;NF-YC
ZaNF-YA1	506	+	CCAAA	NF-YB;NF-YA;NF-YC
ZaNF-YA1	514	-	ATAGG	NF-YB;NF-YA;NF-YC
ZaNF-YA1	529	-	TTTGG	NF-YB;NF-YA;NF-YC
ZaNF-YA1	556	+	CCAAG	NF-YB;NF-YA;NF-YC
ZaNF-YA1	573	+	TCAAT	NF-YB;NF-YA;NF-YC
ZaNF-YA1	630	+	CCAAT	NF-YB;NF-YA;NF-YC
ZaNF-YA1	638	-	ATTGA	NF-YB;NF-YA;NF-YC
ZaNF-YA1	643	-	ATTGT	NF-YB;NF-YA;NF-YC
ZaNF-YA1	657	-	ATTCG	NF-YB;NF-YA;NF-YC
ZaNF-YA1	695	-	TTTGG	NF-YB;NF-YA;NF-YC
ZaNF-YA1	702	-	ATTGT	NF-YB;NF-YA;NF-YC
ZaNF-YA1	725	-	ATTTG	NF-YB;NF-YA;NF-YC
ZaNF-YA1	740	-	ATTGA	NF-YB;NF-YA;NF-YC
ZaNF-YA1	750	-	GTTGG	NF-YB;NF-YA;NF-YC
ZaNF-YA1	759	-	ATTAG	NF-YB;NF-YA;NF-YC
ZaNF-YA1	805	-	CTTGG	NF-YB;NF-YA;NF-YC
ZaNF-YA1	872	-	ATTGC	NF-YB;NF-YA;NF-YC
ZaNF-YA1	908	-	ATTCG	NF-YB;NF-YA;NF-YC
ZaNF-YA1	912	-	GTTGG	NF-YB;NF-YA;NF-YC
ZaNF-YA1	959	-	ATTGT	NF-YB;NF-YA;NF-YC
ZaNF-YA1	980	+	CAAAT	NF-YB;NF-YA;NF-YC
ZaNF-YA1	1009	+	CTAAT	NF-YB;NF-YA;NF-YC
ZaNF-YA1	1078	+	CCATT	NF-YB;NF-YA;NF-YC
ZaNF-YA1	1083	-	TTTGG	NF-YB;NF-YA;NF-YC
ZaNF-YA1	1148	+	CCAAA	NF-YB;NF-YA;NF-YC
ZaNF-YA1	1302	+	CCAGT	NF-YB;NF-YA;NF-YC
ZaNF-YA1	1368	+	TCAAT	NF-YB;NF-YA;NF-YC
ZaNF-YA1	1416	+	CAAAT	NF-YB;NF-YA;NF-YC
ZaNF-YA1	1528	+	GCAAT	NF-YB;NF-YA;NF-YC
ZaNF-YA1	1544	+	CGAAT	NF-YB;NF-YA;NF-YC
ZaNF-YA1	1547	-	ATTGA	NF-YB;NF-YA;NF-YC
ZaNF-YA1	1561	-	GTTGG	NF-YB;NF-YA;NF-YC
ZaNF-YA1	1569	-	TTTGG	NF-YB;NF-YA;NF-YC
ZaNF-YA1	1647	-	ATTAG	NF-YB;NF-YA;NF-YC
ZaNF-YA1	1679	-	ACTGG	NF-YB;NF-YA;NF-YC
ZaNF-YA1	1750	+	CCAAT	NF-YB;NF-YA;NF-YC
ZaNF-YA1	1761	-	TTTGG	NF-YB;NF-YA;NF-YC
ZaNF-YA1	1796	-	ATTTG	NF-YB;NF-YA;NF-YC
ZaNF-YA1	1824	-	TTTGG	NF-YB;NF-YA;NF-YC
ZaNF-YA1	1837	-	ATTTG	NF-YB;NF-YA;NF-YC
ZaNF-YA1	1853	-	GTTGG	NF-YB;NF-YA;NF-YC
ZaNF-YA1	1919	-	CTTGG	NF-YB;NF-YA;NF-YC
ZaNF-YA1	1933	-	ATTTG	NF-YB;NF-YA;NF-YC
ZaNF-YA1	1942	-	ATTGG	NF-YB;NF-YA;NF-YC
ZaNF-YA1	61	+	CCAAC	Dehydrin
ZaNF-YA1	228	+	CGGAC	Dehydrin
ZaNF-YA1	249	+	CTGAC	Dehydrin
ZaNF-YA1	263	-	GTCAG	Dehydrin
ZaNF-YA1	307	+	CGGAC	Dehydrin
ZaNF-YA1	736	-	GTCGA	Dehydrin
ZaNF-YA1	750	-	GTTGG	Dehydrin
ZaNF-YA1	769	+	CCGAG	Dehydrin
ZaNF-YA1	912	-	GTTGG	Dehydrin
ZaNF-YA1	1253	+	CGGAC	Dehydrin
ZaNF-YA1	1277	-	GTCCG	Dehydrin
ZaNF-YA1	1283	-	GTCCG	Dehydrin
ZaNF-YA1	1478	-	GTCCG	Dehydrin
ZaNF-YA1	1516	-	GTCAG	Dehydrin
ZaNF-YA1	1522	-	GTCCG	Dehydrin
ZaNF-YA1	1561	-	GTTGG	Dehydrin
ZaNF-YA1	1853	-	GTTGG	Dehydrin
ZaNF-YA1	4	+	GTTGC	Trihelix
ZaNF-YA1	20	+	GCTAC	Trihelix
ZaNF-YA1	29	+	ATTAC	Trihelix
ZaNF-YA1	52	+	GTTCC	Trihelix
ZaNF-YA1	57	+	GGTAC	Trihelix
ZaNF-YA1	58	-	GTACC	Trihelix
ZaNF-YA1	70	-	CTAAC	Trihelix
ZaNF-YA1	182	-	CTAAC	Trihelix
ZaNF-YA1	202	-	TTAAC	Trihelix
ZaNF-YA1	239	-	GTAGC	Trihelix
ZaNF-YA1	280	-	GTAAA	Trihelix
ZaNF-YA1	285	-	CTAAC	Trihelix
ZaNF-YA1	297	-	GAAAC	Trihelix
ZaNF-YA1	302	+	GTCAC	Trihelix
ZaNF-YA1	302	-	GTCAC	Trihelix
ZaNF-YA1	423	-	ATAAC	Trihelix
ZaNF-YA1	550	-	TTAAC	Trihelix
ZaNF-YA1	560	-	GTAAG	Trihelix
ZaNF-YA1	590	+	GTTAT	Trihelix
ZaNF-YA1	661	+	GTTGC	Trihelix
ZaNF-YA1	681	+	GTTAG	Trihelix
ZaNF-YA1	685	+	GTTTC	Trihelix
ZaNF-YA1	792	+	TTTAC	Trihelix
ZaNF-YA1	830	+	GTTAT	Trihelix
ZaNF-YA1	884	+	GTTGC	Trihelix
ZaNF-YA1	894	+	TTTAC	Trihelix
ZaNF-YA1	947	-	GTAAT	Trihelix
ZaNF-YA1	962	+	GTTAA	Trihelix
ZaNF-YA1	1005	-	GTATC	Trihelix
ZaNF-YA1	1045	-	CTAAC	Trihelix
ZaNF-YA1	1109	-	GTAAA	Trihelix
ZaNF-YA1	1116	-	GTAAT	Trihelix
ZaNF-YA1	1209	+	GTTAG	Trihelix
ZaNF-YA1	1298	+	GTTTC	Trihelix
ZaNF-YA1	1305	+	GTTAA	Trihelix
ZaNF-YA1	1397	-	GTAAA	Trihelix
ZaNF-YA1	1460	-	TTAAC	Trihelix
ZaNF-YA1	1465	+	GTTTC	Trihelix
ZaNF-YA1	1482	-	GTATC	Trihelix
ZaNF-YA1	1487	-	CTAAC	Trihelix
ZaNF-YA1	1507	+	GTTTC	Trihelix
ZaNF-YA1	1574	+	GTTAT	Trihelix
ZaNF-YA1	1601	+	GTTAT	Trihelix
ZaNF-YA1	1624	-	GTAAT	Trihelix
ZaNF-YA1	1640	+	GTTCC	Trihelix
ZaNF-YA1	1654	+	GTTTC	Trihelix
ZaNF-YA1	1660	+	GTTAT	Trihelix
ZaNF-YA1	1673	+	GTCAC	Trihelix
ZaNF-YA1	1673	-	GTCAC	Trihelix
ZaNF-YA1	1695	+	GTAAC	Trihelix
ZaNF-YA1	1695	-	GTAAC	Trihelix
ZaNF-YA1	1778	-	GTAAT	Trihelix
ZaNF-YA1	1802	-	GTAAA	Trihelix
ZaNF-YA1	1812	+	TTTAC	Trihelix
ZaNF-YA1	1926	-	CTAAC	Trihelix
ZaNF-YA1	1962	+	TTTAC	Trihelix
ZaNF-YA1	250	+	TGACC	WRKY
ZaNF-YA1	449	+	TGACT	WRKY
ZaNF-YA1	1216	+	TGACT	WRKY
ZaNF-YA1	1672	-	AGTCA	WRKY
ZaNF-YA1	1990	-	GGTCA	WRKY
ZaNF-YA1	14	+	TGACG	bZIP
ZaNF-YA1	100	-	CTTCA	bZIP
ZaNF-YA1	103	-	CATCA	bZIP
ZaNF-YA1	250	+	TGACC	bZIP
ZaNF-YA1	262	-	TGTCA	bZIP
ZaNF-YA1	301	-	CGTCA	bZIP
ZaNF-YA1	308	+	GGACG	bZIP
ZaNF-YA1	449	+	TGACT	bZIP
ZaNF-YA1	495	-	CTTCA	bZIP
ZaNF-YA1	551	+	TAACG	bZIP
ZaNF-YA1	554	-	CGCCA	bZIP
ZaNF-YA1	677	+	TGATG	bZIP
ZaNF-YA1	735	+	TGTCG	bZIP
ZaNF-YA1	826	+	TGAGG	bZIP
ZaNF-YA1	1156	+	TGATG	bZIP
ZaNF-YA1	1216	+	TGACT	bZIP
ZaNF-YA1	1461	+	TAACG	bZIP
ZaNF-YA1	1503	+	TGACG	bZIP
ZaNF-YA1	1515	-	TGTCA	bZIP
ZaNF-YA1	1549	+	TGAAG	bZIP
ZaNF-YA1	1672	-	AGTCA	bZIP
ZaNF-YA1	1830	+	TCACG	bZIP
ZaNF-YA1	1833	-	CGTGA	bZIP
ZaNF-YA1	1906	+	TGAGG	bZIP
ZaNF-YA1	1913	+	TGAAG	bZIP
ZaNF-YA1	1974	+	TGAGG	bZIP
ZaNF-YA1	1990	-	GGTCA	bZIP
ZaNF-YA1	1181	-	aTTCTT	bZIP
ZaNF-YA1	842	-	aGCTGT	bZIP
ZaNF-YA1	15	+	GACGTg	bHLH
ZaNF-YA1	15	-	gACGTG	bHLH
ZaNF-YA1	91	+	CACGTg	bHLH
ZaNF-YA1	91	-	cACGTG	bHLH
ZaNF-YA1	258	+	CACGTg	bHLH
ZaNF-YA1	258	-	cACGTG	bHLH
ZaNF-YA1	1002	+	CACGTa	bHLH
ZaNF-YA1	1002	-	cACGTA	bHLH
ZaNF-YA1	1049	+	CAAGTg	bHLH
ZaNF-YA1	1049	-	cAAGTG	bHLH
ZaNF-YA1	1204	+	CACTTg	bHLH
ZaNF-YA1	1204	-	cACTTG	bHLH
ZaNF-YA1	1511	+	CCCGTg	bHLH
ZaNF-YA1	1511	-	cCCGTG	bHLH
ZaNF-YA1	1831	+	CACGTg	bHLH
ZaNF-YA1	1831	-	cACGTG	bHLH
ZaNF-YA1	91	+	CACGTg	bHLH
ZaNF-YA1	91	-	cACGTG	bHLH
ZaNF-YA1	258	+	CACGTg	bHLH
ZaNF-YA1	258	-	cACGTG	bHLH
ZaNF-YA1	1049	-	cAAGTG	bHLH
ZaNF-YA1	1204	+	CACTTg	bHLH
ZaNF-YA1	1831	+	CACGTg	bHLH
ZaNF-YA1	1831	-	cACGTG	bHLH
ZaNF-YA1	91	+	CACGTg	bHLH
ZaNF-YA1	91	-	cACGTG	bHLH
ZaNF-YA1	153	+	CATTTg	bHLH
ZaNF-YA1	153	-	cATTTG	bHLH
ZaNF-YA1	258	+	CACGTg	bHLH
ZaNF-YA1	258	-	cACGTG	bHLH
ZaNF-YA1	898	+	CATATg	bHLH
ZaNF-YA1	898	-	cATATG	bHLH
ZaNF-YA1	1049	+	CAAGTg	bHLH
ZaNF-YA1	1049	-	cAAGTG	bHLH
ZaNF-YA1	1204	+	CACTTg	bHLH
ZaNF-YA1	1204	-	cACTTG	bHLH
ZaNF-YA1	1690	+	CATATg	bHLH
ZaNF-YA1	1690	-	cATATG	bHLH
ZaNF-YA1	1699	+	CATCTg	bHLH
ZaNF-YA1	1699	-	cATCTG	bHLH
ZaNF-YA1	1831	+	CACGTg	bHLH
ZaNF-YA1	1831	-	cACGTG	bHLH
ZaNF-YA1	748	+	CTGTTg	(Others)
ZaNF-YA1	844	+	CTGTTg	(Others)
ZaNF-YA1	1303	+	CAGTTa	(Others)
ZaNF-YA1	1658	+	CAGTTa	(Others)
ZaNF-YA1	1303	-	cAGTTA	(Others)
ZaNF-YA1	1658	-	cAGTTA	(Others)
ZaNF-YA1	448	+	TTGACt	WRKY
ZaNF-YA1	1990	-	gGTCAA	WRKY
ZaNF-YA1	262	-	tgTCAGT	(Others)
ZaNF-YA1	735	-	tgTCGAT	(Others)
ZaNF-YA1	1252	+	ACGGAca	(Others)
ZaNF-YA1	1276	-	tgTCCGT	(Others)
ZaNF-YA1	1282	-	tgTCCGT	(Others)
ZaNF-YA1	1477	-	tgTCCGT	(Others)
ZaNF-YA1	1515	-	tgTCAGT	(Others)
ZaNF-YA1	1521	-	tgTCCGT	(Others)
ZaNF-YA1	1218	+	ACTCTat	SRS
ZaNF-YA1	274	+	CTCAGag	Myb/SANT; trp; MYB;NF-YC
ZaNF-YA1	1592	-	ctCTGAG	Myb/SANT; trp; MYB;NF-YC
ZaNF-YA1	90	+	ACACGtgg	bHLH
ZaNF-YA1	107	-	aaaAGTAT	bHLH
ZaNF-YA1	257	-	ccaCGTGT	bHLH
ZaNF-YA1	508	-	aaaCTTAT	bHLH
ZaNF-YA1	989	+	ATACAtat	bHLH
ZaNF-YA1	989	-	ataCATAT	bHLH
ZaNF-YA1	1001	+	ACACGtat	bHLH
ZaNF-YA1	1001	-	acaCGTAT	bHLH
ZaNF-YA1	1441	+	ATACTtat	bHLH
ZaNF-YA1	1441	-	ataCTTAT	bHLH
ZaNF-YA1	1954	+	ATAAGtga	bHLH
ZaNF-YA1	90	-	acaCGTGG	bZIP
ZaNF-YA1	257	+	CCACGtgt	bZIP
ZaNF-YA1	197	+	TAAATtta	Homeodomain; HD-ZIP;HD-ZIP
ZaNF-YA1	197	-	taaATTTA	Homeodomain; HD-ZIP;HD-ZIP
ZaNF-YA1	1405	+	TAAATtta	Homeodomain; HD-ZIP;HD-ZIP
ZaNF-YA1	1405	-	taaATTTA	Homeodomain; HD-ZIP;HD-ZIP
ZaNF-YA1	1635	+	TAAATgtt	Homeodomain; HD-ZIP;HD-ZIP
ZaNF-YA1	1664	-	tagATTTA	Homeodomain; HD-ZIP;HD-ZIP
ZaNF-YA1	1856	-	ggcATTTA	Homeodomain; HD-ZIP;HD-ZIP
ZaNF-YA1	1884	-	tatATTTA	Homeodomain; HD-ZIP;HD-ZIP
ZaNF-YA1	14	+	TGACGtgc	bZIP
ZaNF-YA1	1508	+	TTTCCcgt	E2F/DP
ZaNF-YA1	1369	+	CAATTattt	Homeodomain; bZIP; HD-ZIP
ZaNF-YA1	226	+	acCGGACaa	SBP
ZaNF-YA1	264	+	tcAGTACat	SBP
ZaNF-YA1	974	+	ttTGTACaa	SBP
ZaNF-YA1	975	-	ttGTACAaa	SBP
ZaNF-YA1	1476	-	gtGTCCGta	SBP
ZaNF-YA1	1523	+	tcCGTGCaa	SBP
ZaNF-YA1	1642	+	tcCGTATta	SBP
ZaNF-YA1	1935	-	ttGTATGat	SBP
ZaNF-YA1	10	-	tggatGACGT	(Motif sequence only)
ZaNF-YA1	300	+	ACGTCaccgg	(Motif sequence only)
ZaNF-YA1	822	-	attatGAGGT	(Motif sequence only)
ZaNF-YA1	1457	-	tatttAACGT	(Motif sequence only)
ZaNF-YA1	1499	-	aaaatGACGT	(Motif sequence only)
ZaNF-YA1	1860	-	tttaaGATGT	(Motif sequence only)
ZaNF-YA1	1902	-	tttctGAGGT	(Motif sequence only)
ZaNF-YA1	1078	+	CCATTtttgg	(Motif sequence only)
ZaNF-YA1	1078	-	ccattTTTGG	(Motif sequence only)
ZaNF-YA1	89	+	GACACgtgga	(Motif sequence only)
ZaNF-YA1	256	-	tccacGTGTC	(Motif sequence only)
ZaNF-YA1	1270	-	ttttcGTGTC	(Motif sequence only)
ZaNF-YA1	1276	-	tgtccGTGTC	(Motif sequence only)
ZaNF-YA1	1509	-	ttcccGTGTC	(Motif sequence only)
ZaNF-YA1	1515	-	tgtcaGTGTC	(Motif sequence only)
ZaNF-YA1	90	+	acACGTGgag	(Motif sequence only)
ZaNF-YA1	255	-	atcCACGTgt	(Motif sequence only)
ZaNF-YA1	1138	+	TCTACatttc	(Motif sequence only)
ZaNF-YA1	5	+	TTGCAtggat	(Motif sequence only)
ZaNF-YA1	662	+	TTGCAtgttg	(Motif sequence only)
ZaNF-YA1	797	+	TTGCAaagct	(Motif sequence only)
ZaNF-YA1	873	+	TTGCAtggtt	(Motif sequence only)
ZaNF-YA1	947	+	GTAATgatttt	(Motif sequence only)
ZaNF-YA1	1116	+	GTAATtaatat	(Motif sequence only)
ZaNF-YA1	1778	+	GTAATgcttag	(Motif sequence only)
ZaNF-YA1	753	-	gggttgaTTAGA	(Motif sequence only)
ZaNF-YA1	255	-	atccacgTGTCA	(Motif sequence only)
ZaNF-YA1	1508	-	tttcccgTGTCA	(Motif sequence only)
ZaNF-YA1	1076	-	atccatttttGGAAA	(Motif sequence only)
ZaNF-YA1	1612	+	TTGCCcctttctgtaa	(Motif sequence only)
ZaNF-YA1	1790	-	atttatatttgtgTAAAC	(Motif sequence only)
ZaNF-YA1	1074	+	agatCCATTtttggaaag	(Motif sequence only)
ZaNF-YA1	1074	-	agatccattTTTGGaaag	(Motif sequence only)
ZaNF-YA1	1167	-	ctttctaaaTATGGattc	(Motif sequence only)
ZaNF-YA1	93	-	CGTGGagcttcatcaaaag	(Motif sequence only)
ZaNF-YA1	243	+	cgaaatctgaccatCCACG	(Motif sequence only)
ZaNF-YA1	55	-	CCGGT	(Motif sequence only)
ZaNF-YA1	152	-	CCATT	(Motif sequence only)
ZaNF-YA1	225	+	AACCG	(Motif sequence only)
ZaNF-YA1	226	+	ACCGG	(Motif sequence only)
ZaNF-YA1	299	+	AACGT	(Motif sequence only)
ZaNF-YA1	305	+	ACCGG	(Motif sequence only)
ZaNF-YA1	552	+	AACGC	(Motif sequence only)
ZaNF-YA1	567	-	CCTTT	(Motif sequence only)
ZaNF-YA1	585	-	TCGTT	(Motif sequence only)
ZaNF-YA1	659	-	TCGTT	(Motif sequence only)
ZaNF-YA1	748	-	CTGTT	(Motif sequence only)
ZaNF-YA1	844	-	CTGTT	(Motif sequence only)
ZaNF-YA1	910	-	TCGTT	(Motif sequence only)
ZaNF-YA1	922	+	AAAGG	(Motif sequence only)
ZaNF-YA1	923	+	AAGGG	(Motif sequence only)
ZaNF-YA1	1059	+	AAGGG	(Motif sequence only)
ZaNF-YA1	1078	-	CCATT	(Motif sequence only)
ZaNF-YA1	1195	-	CCCTT	(Motif sequence only)
ZaNF-YA1	1251	+	CACGG	(Motif sequence only)
ZaNF-YA1	1261	-	CCGTT	(Motif sequence only)
ZaNF-YA1	1279	-	CCGTG	(Motif sequence only)
ZaNF-YA1	1285	-	CCGTG	(Motif sequence only)
ZaNF-YA1	1303	-	CAGTT	(Motif sequence only)
ZaNF-YA1	1462	+	AACGT	(Motif sequence only)
ZaNF-YA1	1463	-	ACGTT	(Motif sequence only)
ZaNF-YA1	1480	-	CCGTA	(Motif sequence only)
ZaNF-YA1	1505	-	ACGTT	(Motif sequence only)
ZaNF-YA1	1512	-	CCGTG	(Motif sequence only)
ZaNF-YA1	1524	-	CCGTG	(Motif sequence only)
ZaNF-YA1	1616	-	CCCTT	(Motif sequence only)
ZaNF-YA1	1617	-	CCTTT	(Motif sequence only)
ZaNF-YA1	1643	-	CCGTA	(Motif sequence only)
ZaNF-YA1	1658	-	CAGTT	(Motif sequence only)
ZaNF-YA1	1816	-	CAGTT	(Motif sequence only)
ZaNF-YA1	1987	+	AACGG	(Motif sequence only)
ZaNF-YA1	1995	+	AAAGG	(Motif sequence only)
ZaNF-YA1	15	-	GACGT	(Motif sequence only)
ZaNF-YA1	16	+	ACGTG	(Motif sequence only)
ZaNF-YA1	91	-	CACGT	(Motif sequence only)
ZaNF-YA1	92	+	ACGTG	(Motif sequence only)
ZaNF-YA1	236	-	CAAGT	(Motif sequence only)
ZaNF-YA1	258	-	CACGT	(Motif sequence only)
ZaNF-YA1	259	+	ACGTG	(Motif sequence only)
ZaNF-YA1	299	-	AACGT	(Motif sequence only)
ZaNF-YA1	300	+	ACGTC	(Motif sequence only)
ZaNF-YA1	433	+	AAGTG	(Motif sequence only)
ZaNF-YA1	557	-	CAAGT	(Motif sequence only)
ZaNF-YA1	562	+	AAGTG	(Motif sequence only)
ZaNF-YA1	665	-	CATGT	(Motif sequence only)
ZaNF-YA1	795	+	ACTTG	(Motif sequence only)
ZaNF-YA1	833	+	ATGTG	(Motif sequence only)
ZaNF-YA1	1002	-	CACGT	(Motif sequence only)
ZaNF-YA1	1003	+	ACGTA	(Motif sequence only)
ZaNF-YA1	1049	-	CAAGT	(Motif sequence only)
ZaNF-YA1	1050	+	AAGTG	(Motif sequence only)
ZaNF-YA1	1153	+	AAGTG	(Motif sequence only)
ZaNF-YA1	1158	+	ATGTG	(Motif sequence only)
ZaNF-YA1	1204	-	CACTT	(Motif sequence only)
ZaNF-YA1	1205	+	ACTTG	(Motif sequence only)
ZaNF-YA1	1251	-	CACGG	(Motif sequence only)
ZaNF-YA1	1260	-	CCCGT	(Motif sequence only)
ZaNF-YA1	1273	+	TCGTG	(Motif sequence only)
ZaNF-YA1	1279	+	CCGTG	(Motif sequence only)
ZaNF-YA1	1285	+	CCGTG	(Motif sequence only)
ZaNF-YA1	1462	-	AACGT	(Motif sequence only)
ZaNF-YA1	1463	+	ACGTT	(Motif sequence only)
ZaNF-YA1	1474	+	GCGTG	(Motif sequence only)
ZaNF-YA1	1504	-	GACGT	(Motif sequence only)
ZaNF-YA1	1505	+	ACGTT	(Motif sequence only)
ZaNF-YA1	1511	-	CCCGT	(Motif sequence only)
ZaNF-YA1	1512	+	CCGTG	(Motif sequence only)
ZaNF-YA1	1524	+	CCGTG	(Motif sequence only)
ZaNF-YA1	1650	+	AGGTG	(Motif sequence only)
ZaNF-YA1	1831	-	CACGT	(Motif sequence only)
ZaNF-YA1	1832	+	ACGTG	(Motif sequence only)
ZaNF-YA1	1918	+	ACTTG	(Motif sequence only)
ZaNF-YA1	1956	+	AAGTG	(Motif sequence only)
ZaNF-YA1	42	-	TTCTC	(Motif sequence only)
ZaNF-YA1	44	-	CTCTC	(Motif sequence only)
ZaNF-YA1	89	+	GACAC	(Motif sequence only)
ZaNF-YA1	261	-	GTGTC	(Motif sequence only)
ZaNF-YA1	297	+	GAAAC	(Motif sequence only)
ZaNF-YA1	302	-	GTCAC	(Motif sequence only)
ZaNF-YA1	356	+	AAGAC	(Motif sequence only)
ZaNF-YA1	420	+	GAGAT	(Motif sequence only)
ZaNF-YA1	437	+	GAGAA	(Motif sequence only)
ZaNF-YA1	466	-	TTCTC	(Motif sequence only)
ZaNF-YA1	468	-	CTCTC	(Motif sequence only)
ZaNF-YA1	476	-	GTCTC	(Motif sequence only)
ZaNF-YA1	478	-	CTCTC	(Motif sequence only)
ZaNF-YA1	480	-	CTCTC	(Motif sequence only)
ZaNF-YA1	609	-	TTCTC	(Motif sequence only)
ZaNF-YA1	685	-	GTTTC	(Motif sequence only)
ZaNF-YA1	729	-	GTGTC	(Motif sequence only)
ZaNF-YA1	771	+	GAGAA	(Motif sequence only)
ZaNF-YA1	780	+	GAGAC	(Motif sequence only)
ZaNF-YA1	810	+	GAGAG	(Motif sequence only)
ZaNF-YA1	812	+	GAGAG	(Motif sequence only)
ZaNF-YA1	814	+	GAGAG	(Motif sequence only)
ZaNF-YA1	816	+	GAGAG	(Motif sequence only)
ZaNF-YA1	818	+	GAGAA	(Motif sequence only)
ZaNF-YA1	1005	-	GTATC	(Motif sequence only)
ZaNF-YA1	1073	+	GAGAT	(Motif sequence only)
ZaNF-YA1	1217	-	GACTC	(Motif sequence only)
ZaNF-YA1	1255	+	GACAC	(Motif sequence only)
ZaNF-YA1	1275	-	GTGTC	(Motif sequence only)
ZaNF-YA1	1281	-	GTGTC	(Motif sequence only)
ZaNF-YA1	1298	-	GTTTC	(Motif sequence only)
ZaNF-YA1	1465	-	GTTTC	(Motif sequence only)
ZaNF-YA1	1467	-	TTCTC	(Motif sequence only)
ZaNF-YA1	1476	-	GTGTC	(Motif sequence only)
ZaNF-YA1	1482	-	GTATC	(Motif sequence only)
ZaNF-YA1	1507	-	GTTTC	(Motif sequence only)
ZaNF-YA1	1514	-	GTGTC	(Motif sequence only)
ZaNF-YA1	1520	-	GTGTC	(Motif sequence only)
ZaNF-YA1	1553	+	GAGAT	(Motif sequence only)
ZaNF-YA1	1584	+	GAGAG	(Motif sequence only)
ZaNF-YA1	1586	+	GAGAT	(Motif sequence only)
ZaNF-YA1	1590	-	TTCTC	(Motif sequence only)
ZaNF-YA1	1654	-	GTTTC	(Motif sequence only)
ZaNF-YA1	1673	-	GTCAC	(Motif sequence only)
ZaNF-YA1	1704	-	GTCTT	(Motif sequence only)
ZaNF-YA1	1869	-	TTCTC	(Motif sequence only)
ZaNF-YA1	1915	+	AAGAC	(Motif sequence only)
ZaNF-YA1	1981	-	ATCTC	(Motif sequence only)
ZaNF-YA1	4	-	GTTGC	(Motif sequence only)
ZaNF-YA1	20	+	GCTAC	(Motif sequence only)
ZaNF-YA1	23	+	ACCAC	(Motif sequence only)
ZaNF-YA1	89	+	GACAC	(Motif sequence only)
ZaNF-YA1	94	-	GTGGA	(Motif sequence only)
ZaNF-YA1	239	-	GTAGC	(Motif sequence only)
ZaNF-YA1	256	+	TCCAC	(Motif sequence only)
ZaNF-YA1	261	-	GTGTC	(Motif sequence only)
ZaNF-YA1	302	+	GTCAC	(Motif sequence only)
ZaNF-YA1	502	+	GCCAC	(Motif sequence only)
ZaNF-YA1	555	+	GCCAA	(Motif sequence only)
ZaNF-YA1	564	-	GTGCC	(Motif sequence only)
ZaNF-YA1	629	+	GCCAA	(Motif sequence only)
ZaNF-YA1	661	-	GTTGC	(Motif sequence only)
ZaNF-YA1	729	-	GTGTC	(Motif sequence only)
ZaNF-YA1	884	-	GTTGC	(Motif sequence only)
ZaNF-YA1	1192	-	GTGCC	(Motif sequence only)
ZaNF-YA1	1200	-	ATGGC	(Motif sequence only)
ZaNF-YA1	1202	+	GGCAC	(Motif sequence only)
ZaNF-YA1	1255	+	GACAC	(Motif sequence only)
ZaNF-YA1	1275	-	GTGTC	(Motif sequence only)
ZaNF-YA1	1281	-	GTGTC	(Motif sequence only)
ZaNF-YA1	1476	-	GTGTC	(Motif sequence only)
ZaNF-YA1	1514	-	GTGTC	(Motif sequence only)
ZaNF-YA1	1520	-	GTGTC	(Motif sequence only)
ZaNF-YA1	1614	+	GCCCC	(Motif sequence only)
ZaNF-YA1	1673	+	GTCAC	(Motif sequence only)
ZaNF-YA1	1727	-	GTGGA	(Motif sequence only)
ZaNF-YA1	1731	-	ATGGC	(Motif sequence only)
ZaNF-YA1	1745	+	GCCCC	(Motif sequence only)
ZaNF-YA1	1854	-	TTGGC	(Motif sequence only)
ZaNF-YA1	1877	-	GTGGC	(Motif sequence only)
ZaNF-YA1	1943	-	TTGGC	(Motif sequence only)
ZaNF-YA1	1946	+	GCCAG	(Motif sequence only)
ZaNF-YA1	564	+	GTGCC	(Motif sequence only)
ZaNF-YA1	1061	+	GGGCA	(Motif sequence only)
ZaNF-YA1	1192	+	GTGCC	(Motif sequence only)
ZaNF-YA1	1193	-	TGCCC	(Motif sequence only)
ZaNF-YA1	1202	-	GGCAC	(Motif sequence only)
ZaNF-YA1	1613	-	TGCCC	(Motif sequence only)
ZaNF-YA1	1614	-	GCCCC	(Motif sequence only)
ZaNF-YA1	1744	-	TGCCC	(Motif sequence only)
ZaNF-YA1	1745	-	GCCCC	(Motif sequence only)
ZaNF-YA1	1944	+	TGGCC	(Motif sequence only)
ZaNF-YA1	1945	-	GGCCA	(Motif sequence only)
ZaNF-YA1	39	+	AGATT	(Motif sequence only)
ZaNF-YA1	140	+	TGATT	(Motif sequence only)
ZaNF-YA1	157	+	TGATT	(Motif sequence only)
ZaNF-YA1	246	-	AATCT	(Motif sequence only)
ZaNF-YA1	314	-	AATCA	(Motif sequence only)
ZaNF-YA1	462	+	CGATT	(Motif sequence only)
ZaNF-YA1	580	+	AGATT	(Motif sequence only)
ZaNF-YA1	594	+	TGATT	(Motif sequence only)
ZaNF-YA1	619	+	CGATT	(Motif sequence only)
ZaNF-YA1	655	+	TGATT	(Motif sequence only)
ZaNF-YA1	738	+	CGATT	(Motif sequence only)
ZaNF-YA1	757	+	TGATT	(Motif sequence only)
ZaNF-YA1	766	-	AATCC	(Motif sequence only)
ZaNF-YA1	836	+	TGATT	(Motif sequence only)
ZaNF-YA1	848	+	TGATT	(Motif sequence only)
ZaNF-YA1	867	+	TGATT	(Motif sequence only)
ZaNF-YA1	906	+	TGATT	(Motif sequence only)
ZaNF-YA1	951	+	TGATT	(Motif sequence only)
ZaNF-YA1	969	+	AGATT	(Motif sequence only)
ZaNF-YA1	1016	+	TGATT	(Motif sequence only)
ZaNF-YA1	1179	+	GGATT	(Motif sequence only)
ZaNF-YA1	1331	-	AATCA	(Motif sequence only)
ZaNF-YA1	1339	+	TGATT	(Motif sequence only)
ZaNF-YA1	1353	+	TGATT	(Motif sequence only)
ZaNF-YA1	1366	-	AATCA	(Motif sequence only)
ZaNF-YA1	1451	+	TGATT	(Motif sequence only)
ZaNF-YA1	1530	-	AATCT	(Motif sequence only)
ZaNF-YA1	1587	+	AGATT	(Motif sequence only)
ZaNF-YA1	1665	+	AGATT	(Motif sequence only)
ZaNF-YA1	1835	+	TGATT	(Motif sequence only)
ZaNF-YA1	1940	+	TGATT	(Motif sequence only)
ZaNF-YA1	1959	+	TGATT	(Motif sequence only)
ZaNF-YA1	1980	-	AATCT	(Motif sequence only)
ZaNF-YA1	13	+	ATGAC	(Motif sequence only)
ZaNF-YA1	78	-	TTCAA	(Motif sequence only)
ZaNF-YA1	104	-	ATCAA	(Motif sequence only)
ZaNF-YA1	127	-	ATCAA	(Motif sequence only)
ZaNF-YA1	139	+	TTGAT	(Motif sequence only)
ZaNF-YA1	147	+	TTGAA	(Motif sequence only)
ZaNF-YA1	156	+	TTGAT	(Motif sequence only)
ZaNF-YA1	202	+	TTAAC	(Motif sequence only)
ZaNF-YA1	230	-	GACAA	(Motif sequence only)
ZaNF-YA1	249	+	CTGAC	(Motif sequence only)
ZaNF-YA1	263	-	GTCAG	(Motif sequence only)
ZaNF-YA1	280	-	GTAAA	(Motif sequence only)
ZaNF-YA1	302	-	GTCAC	(Motif sequence only)
ZaNF-YA1	448	+	TTGAC	(Motif sequence only)
ZaNF-YA1	470	-	CTCAA	(Motif sequence only)
ZaNF-YA1	496	-	TTCAA	(Motif sequence only)
ZaNF-YA1	550	+	TTAAC	(Motif sequence only)
ZaNF-YA1	555	-	GCCAA	(Motif sequence only)
ZaNF-YA1	572	-	TTCAA	(Motif sequence only)
ZaNF-YA1	629	-	GCCAA	(Motif sequence only)
ZaNF-YA1	639	+	TTGAA	(Motif sequence only)
ZaNF-YA1	654	+	TTGAT	(Motif sequence only)
ZaNF-YA1	715	+	TTGAG	(Motif sequence only)
ZaNF-YA1	721	+	TTGAA	(Motif sequence only)
ZaNF-YA1	736	-	GTCGA	(Motif sequence only)
ZaNF-YA1	741	+	TTGAA	(Motif sequence only)
ZaNF-YA1	756	+	TTGAT	(Motif sequence only)
ZaNF-YA1	778	+	TTGAG	(Motif sequence only)
ZaNF-YA1	792	+	TTTAC	(Motif sequence only)
ZaNF-YA1	847	+	TTGAT	(Motif sequence only)
ZaNF-YA1	866	+	TTGAT	(Motif sequence only)
ZaNF-YA1	894	+	TTTAC	(Motif sequence only)
ZaNF-YA1	905	+	TTGAT	(Motif sequence only)
ZaNF-YA1	962	-	GTTAA	(Motif sequence only)
ZaNF-YA1	1015	+	TTGAT	(Motif sequence only)
ZaNF-YA1	1109	-	GTAAA	(Motif sequence only)
ZaNF-YA1	1128	+	TTGAT	(Motif sequence only)
ZaNF-YA1	1160	-	GTGAA	(Motif sequence only)
ZaNF-YA1	1215	+	ATGAC	(Motif sequence only)
ZaNF-YA1	1305	-	GTTAA	(Motif sequence only)
ZaNF-YA1	1338	+	TTGAT	(Motif sequence only)
ZaNF-YA1	1352	+	TTGAT	(Motif sequence only)
ZaNF-YA1	1367	-	ATCAA	(Motif sequence only)
ZaNF-YA1	1397	-	GTAAA	(Motif sequence only)
ZaNF-YA1	1414	-	TTCAA	(Motif sequence only)
ZaNF-YA1	1450	+	TTGAT	(Motif sequence only)
ZaNF-YA1	1460	+	TTAAC	(Motif sequence only)
ZaNF-YA1	1502	+	ATGAC	(Motif sequence only)
ZaNF-YA1	1516	-	GTCAG	(Motif sequence only)
ZaNF-YA1	1548	+	TTGAA	(Motif sequence only)
ZaNF-YA1	1612	+	TTGCC	(Motif sequence only)
ZaNF-YA1	1673	-	GTCAC	(Motif sequence only)
ZaNF-YA1	1743	+	TTGCC	(Motif sequence only)
ZaNF-YA1	1802	-	GTAAA	(Motif sequence only)
ZaNF-YA1	1812	+	TTTAC	(Motif sequence only)
ZaNF-YA1	1829	+	TTCAC	(Motif sequence only)
ZaNF-YA1	1854	+	TTGGC	(Motif sequence only)
ZaNF-YA1	1912	+	TTGAA	(Motif sequence only)
ZaNF-YA1	1943	+	TTGGC	(Motif sequence only)
ZaNF-YA1	1962	+	TTTAC	(Motif sequence only)
ZaNF-YA1	1983	-	CTCAA	(Motif sequence only)
ZaNF-YA1	1991	-	GTCAA	(Motif sequence only)
ZaNF-YA1	1188	-	aTGAGT	(Motif sequence only)
ZaNF-YA1	472	-	cAAAGT	(Motif sequence only)
ZaNF-YA1	320	+	AGCAGc	(Motif sequence only)
ZaNF-YA1	1237	-	gCTGCT	(Motif sequence only)
ZaNF-YA1	1896	-	gCTGCT	(Motif sequence only)
ZaNF-YA1	353	+	GATAAg	(Motif sequence only)
ZaNF-YA1	860	-	cTTATC	(Motif sequence only)
ZaNF-YA1	124	-	tTTATC	(Motif sequence only)
ZaNF-YA1	177	-	aTTTTC	(Motif sequence only)
ZaNF-YA1	209	+	GGAAAa	(Motif sequence only)
ZaNF-YA1	210	+	GAAAAa	(Motif sequence only)
ZaNF-YA1	330	+	GGAAAt	(Motif sequence only)
ZaNF-YA1	457	-	tTTTTC	(Motif sequence only)
ZaNF-YA1	486	+	GATAAa	(Motif sequence only)
ZaNF-YA1	540	-	tTTTTC	(Motif sequence only)
ZaNF-YA1	569	-	tTTTTC	(Motif sequence only)
ZaNF-YA1	606	-	tTTTTC	(Motif sequence only)
ZaNF-YA1	614	-	tTTTTC	(Motif sequence only)
ZaNF-YA1	763	+	GAAAAt	(Motif sequence only)
ZaNF-YA1	919	+	GATAAa	(Motif sequence only)
ZaNF-YA1	1029	-	aTTTTC	(Motif sequence only)
ZaNF-YA1	1030	-	tTTTCC	(Motif sequence only)
ZaNF-YA1	1038	+	GGAAAt	(Motif sequence only)
ZaNF-YA1	1099	+	GGAAAa	(Motif sequence only)
ZaNF-YA1	1100	+	GAAAAa	(Motif sequence only)
ZaNF-YA1	1130	+	GATAAt	(Motif sequence only)
ZaNF-YA1	1134	-	aTTTTC	(Motif sequence only)
ZaNF-YA1	1143	-	aTTTCC	(Motif sequence only)
ZaNF-YA1	1223	-	aTTTTC	(Motif sequence only)
ZaNF-YA1	1230	-	tTTATC	(Motif sequence only)
ZaNF-YA1	1327	+	GAAAAa	(Motif sequence only)
ZaNF-YA1	1356	-	tTTTTC	(Motif sequence only)
ZaNF-YA1	1498	+	GAAAAt	(Motif sequence only)
ZaNF-YA1	1719	-	aTTATC	(Motif sequence only)
ZaNF-YA1	16	-	aCGTGC	(Motif sequence only)
ZaNF-YA1	1830	+	TCACGt	(Motif sequence only)
ZaNF-YA1	1832	-	aCGTGA	(Motif sequence only)
ZaNF-YA1	918	-	gGATAA	(Motif sequence only)
ZaNF-YA1	149	+	gAACCA	(Motif sequence only)
ZaNF-YA1	531	-	TGGTTc	(Motif sequence only)
ZaNF-YA1	878	-	TGGTTt	(Motif sequence only)
ZaNF-YA1	902	-	TGGTTg	(Motif sequence only)
ZaNF-YA1	1559	-	TGGTTg	(Motif sequence only)
ZaNF-YA1	1826	-	TGGTTc	(Motif sequence only)
ZaNF-YA1	1303	-	CAGTTa	(Motif sequence only)
ZaNF-YA1	1658	-	CAGTTa	(Motif sequence only)
ZaNF-YA1	522	-	ttTGTTT	(Motif sequence only)
ZaNF-YA1	643	-	atTGTTT	(Motif sequence only)
ZaNF-YA1	649	-	tgTGTTT	(Motif sequence only)
ZaNF-YA1	710	-	ctTGTTT	(Motif sequence only)
ZaNF-YA1	890	-	taTGTTT	(Motif sequence only)
ZaNF-YA1	1534	-	taTGTTT	(Motif sequence only)
ZaNF-YA1	1804	+	AAACAta	(Motif sequence only)
ZaNF-YA1	89	-	gaCACGT	(Motif sequence only)
ZaNF-YA1	92	+	ACGTGga	(Motif sequence only)
ZaNF-YA1	256	-	tcCACGT	(Motif sequence only)
ZaNF-YA1	259	+	ACGTGtc	(Motif sequence only)
ZaNF-YA1	1000	-	caCACGT	(Motif sequence only)
ZaNF-YA1	89	-	gaCACGT	(Motif sequence only)
ZaNF-YA1	259	+	ACGTGtc	(Motif sequence only)
ZaNF-YA1	1000	-	caCACGT	(Motif sequence only)
ZaNF-YA1	630	+	CCAATtt	(Motif sequence only)
ZaNF-YA1	70	+	CTAACta	(Motif sequence only)
ZaNF-YA1	182	+	CTAACta	(Motif sequence only)
ZaNF-YA1	285	+	CTAACaa	(Motif sequence only)
ZaNF-YA1	1045	+	CTAACaa	(Motif sequence only)
ZaNF-YA1	1207	-	ttGTTAG	(Motif sequence only)
ZaNF-YA1	283	-	aaCTAAC	(Motif sequence only)
ZaNF-YA1	681	+	GTTAGtt	(Motif sequence only)
ZaNF-YA1	1924	-	agCTAAC	(Motif sequence only)
ZaNF-YA1	90	-	aCACGTg	(Motif sequence only)
ZaNF-YA1	91	+	cACGTGg	(Motif sequence only)
ZaNF-YA1	257	-	cCACGTg	(Motif sequence only)
ZaNF-YA1	258	+	cACGTGt	(Motif sequence only)
ZaNF-YA1	286	+	TAACAag	(Motif sequence only)
ZaNF-YA1	587	-	gtTGTTA	(Motif sequence only)
ZaNF-YA1	959	-	atTGTTA	(Motif sequence only)
ZaNF-YA1	1046	+	TAACAag	(Motif sequence only)
ZaNF-YA1	1206	-	ctTGTTA	(Motif sequence only)
ZaNF-YA1	1598	-	gtTGTTA	(Motif sequence only)
ZaNF-YA1	1927	+	TAACAta	(Motif sequence only)
ZaNF-YA1	102	+	TCATCaa	(Motif sequence only)
ZaNF-YA1	77	-	atTCAAA	(Motif sequence only)
ZaNF-YA1	138	+	TTTGAtt	(Motif sequence only)
ZaNF-YA1	155	+	TTTGAtt	(Motif sequence only)
ZaNF-YA1	653	+	TTTGAtt	(Motif sequence only)
ZaNF-YA1	714	+	TTTGAgt	(Motif sequence only)
ZaNF-YA1	720	+	TTTGAat	(Motif sequence only)
ZaNF-YA1	1014	+	TTTGAtt	(Motif sequence only)
ZaNF-YA1	1337	+	TTTGAtt	(Motif sequence only)
ZaNF-YA1	1351	+	TTTGAtt	(Motif sequence only)
ZaNF-YA1	1449	+	TTTGAtt	(Motif sequence only)
ZaNF-YA1	1990	-	ggTCAAA	(Motif sequence only)
ZaNF-YA1	515	-	tagGGTTT	(Motif sequence only)
ZaNF-YA1	1294	-	taaGGTTT	(Motif sequence only)
ZaNF-YA1	969	-	AGATTttt	(Motif sequence only)
ZaNF-YA1	644	-	ttgTTTGT	(Motif sequence only)
ZaNF-YA1	1261	-	ccgTTTTG	(Motif sequence only)
ZaNF-YA1	1993	+	CAAAAggc	(Motif sequence only)
ZaNF-YA1	649	-	tgtGTTTG	(Motif sequence only)
ZaNF-YA1	985	-	ataTATAC	(Motif sequence only)
ZaNF-YA1	993	-	ataTATAC	(Motif sequence only)
ZaNF-YA1	1437	-	ataTATAC	(Motif sequence only)
ZaNF-YA1	1689	+	GCATAtgt	(Motif sequence only)
ZaNF-YA1	1764	+	GGATAtca	(Motif sequence only)
ZaNF-YA1	1769	-	tcaTATTC	(Motif sequence only)
ZaNF-YA1	1883	+	GTATAttt	(Motif sequence only)
ZaNF-YA1	1966	-	ctaTATTC	(Motif sequence only)
ZaNF-YA1	835	+	GTGATtaa	(Motif sequence only)
ZaNF-YA1	504	+	cACCAAac	(Motif sequence only)
ZaNF-YA1	1823	-	gtTTGGTt	(Motif sequence only)
ZaNF-YA1	197	+	TAAATtta	(Motif sequence only)
ZaNF-YA1	197	-	taaATTTA	(Motif sequence only)
ZaNF-YA1	1405	+	TAAATtta	(Motif sequence only)
ZaNF-YA1	1405	-	taaATTTA	(Motif sequence only)
ZaNF-YA1	1635	+	TAAATgtt	(Motif sequence only)
ZaNF-YA1	1664	-	tagATTTA	(Motif sequence only)
ZaNF-YA1	1856	-	ggcATTTA	(Motif sequence only)
ZaNF-YA1	1884	-	tatATTTA	(Motif sequence only)
ZaNF-YA1	14	+	TGACGtgc	(Motif sequence only)
ZaNF-YA1	298	-	aaaCGTCA	(Motif sequence only)
ZaNF-YA1	551	+	TAACGcca	(Motif sequence only)
ZaNF-YA1	551	-	taaCGCCA	(Motif sequence only)
ZaNF-YA1	677	+	TGATGtta	(Motif sequence only)
ZaNF-YA1	826	+	TGAGGtta	(Motif sequence only)
ZaNF-YA1	1156	+	TGATGtga	(Motif sequence only)
ZaNF-YA1	1503	+	TGACGttt	(Motif sequence only)
ZaNF-YA1	1669	-	ttaAGTCA	(Motif sequence only)
ZaNF-YA1	1830	+	TCACGtga	(Motif sequence only)
ZaNF-YA1	1830	-	tcaCGTGA	(Motif sequence only)
ZaNF-YA1	1031	+	TTTCCtgg	(Motif sequence only)
ZaNF-YA1	1035	-	ctgGGAAA	(Motif sequence only)
ZaNF-YA1	1144	+	TTTCCcaa	(Motif sequence only)
ZaNF-YA1	1299	+	TTTCCagt	(Motif sequence only)
ZaNF-YA1	1508	+	TTTCCcgt	(Motif sequence only)
ZaNF-YA1	1035	-	ctGGGAAa	(Motif sequence only)
ZaNF-YA1	1508	+	tTTCCCgt	(Motif sequence only)
ZaNF-YA1	1611	+	tTTGCCcc	(Motif sequence only)
ZaNF-YA1	1742	+	tTTGCCcc	(Motif sequence only)
ZaNF-YA1	1942	+	aTTGGCca	(Motif sequence only)
ZaNF-YA1	1948	-	caGGGAAt	(Motif sequence only)
ZaNF-YA1	1975	-	gaGGGAAt	(Motif sequence only)
ZaNF-YA1	89	-	gaCACGTg	(Motif sequence only)
ZaNF-YA1	91	+	cACGTGga	(Motif sequence only)
ZaNF-YA1	256	-	tcCACGTg	(Motif sequence only)
ZaNF-YA1	258	+	cACGTGtc	(Motif sequence only)
ZaNF-YA1	89	-	gacACGTGg	(Motif sequence only)
ZaNF-YA1	90	+	aCACGTgga	(Motif sequence only)
ZaNF-YA1	256	-	tccACGTGt	(Motif sequence only)
ZaNF-YA1	257	+	cCACGTgtc	(Motif sequence only)
ZaNF-YA1	985	-	atatATACA	(Motif sequence only)
ZaNF-YA1	993	-	atatATACA	(Motif sequence only)
ZaNF-YA2	615	-	aacAATTAtt	AT-Hook
ZaNF-YA2	1448	-	ataAATTAtt	AT-Hook
ZaNF-YA2	1358	+	tATATAaatt	AT-Hook
ZaNF-YA2	1350	+	tAATATatta	AT-Hook
ZaNF-YA2	1350	-	taatATATTa	AT-Hook
ZaNF-YA2	293	-	gatTTAATta	AT-Hook
ZaNF-YA2	1059	-	aatTTAATtg	AT-Hook
ZaNF-YA2	1426	+	tATTATaata	AT-Hook
ZaNF-YA2	1426	-	tattATAATa	AT-Hook
ZaNF-YA2	1451	+	aATTATtatt	AT-Hook
ZaNF-YA2	293	-	gattTAATTa	AT-Hook
ZaNF-YA2	1059	-	aattTAATTg	AT-Hook
ZaNF-YA2	1350	+	tAATATatta	AT-Hook
ZaNF-YA2	1350	-	taatATATTa	AT-Hook
ZaNF-YA2	1415	-	aaaaATATTt	AT-Hook
ZaNF-YA2	1417	+	aAATATtttt	AT-Hook
ZaNF-YA2	180	+	aaatTTATTt	AT-Hook
ZaNF-YA2	184	+	ttatTTATTt	AT-Hook
ZaNF-YA2	188	+	ttatTTATTt	AT-Hook
ZaNF-YA2	737	+	aaatTTATTt	AT-Hook
ZaNF-YA2	885	+	aaatTTATTc	AT-Hook
ZaNF-YA2	915	+	tcatTTATTt	AT-Hook
ZaNF-YA2	1456	+	ttatTTATTt	AT-Hook
ZaNF-YA2	762	+	gaaACGTAaa	NAC; NAM
ZaNF-YA2	762	-	gaaACGTAaa	NAC; NAM
ZaNF-YA2	1832	+	taaTGATTgg	Homeodomain; bZIP; HD-ZIP
ZaNF-YA2	1450	+	aaATTATtat	bZIP; Homeodomain; HD-ZIP
ZaNF-YA2	211	+	gaaATATCgt	MYB-related
ZaNF-YA2	902	-	aaGATATtct	MYB-related
ZaNF-YA2	1631	+	tgaATATCtt	MYB-related
ZaNF-YA2	1930	-	aaaCTTTTtg	Dof
ZaNF-YA2	1465	-	taAGATTttt	MYB; G2-like
ZaNF-YA2	1975	-	gcAGATTctg	MYB; G2-like
ZaNF-YA2	1449	+	taaATTATta	bZIP; Homeodomain; HD-ZIP
ZaNF-YA2	902	+	aagaTATTCt	Myb/SANT; MYB; G2-like
ZaNF-YA2	1801	-	ggtTCCGGaa	LOB; LBD
ZaNF-YA2	1803	+	ttCCGGAatt	LOB; LBD
ZaNF-YA2	817	+	aCAACAta	AP2; RAV
ZaNF-YA2	1901	-	taTGTTGa	AP2; RAV
ZaNF-YA2	614	+	aaacaATTATtcaa	Homeodomain; bZIP; HD-ZIP
ZaNF-YA2	1447	+	tataaATTATtatt	Homeodomain; bZIP; HD-ZIP
ZaNF-YA2	817	+	aCAACAta	AP2; RAV
ZaNF-YA2	1901	-	taTGTTGa	AP2; RAV
ZaNF-YA2	815	+	agaCAACAtaaa	AP2; B3; RAV
ZaNF-YA2	1827	+	acaattaATGATtggagca	bZIP; Homeodomain; HD-ZIP
ZaNF-YA2	617	+	caaTTATTc	Homeodomain; bZIP; HD-ZIP
ZaNF-YA2	1072	-	aAATAAtgg	Homeodomain; bZIP; HD-ZIP
ZaNF-YA2	1401	+	ccaTTATTt	Homeodomain; bZIP; HD-ZIP
ZaNF-YA2	815	-	agaCAACAta	AP2; B3; RAV
ZaNF-YA2	1901	+	taTGTTGatc	AP2; B3; RAV
ZaNF-YA2	652	+	gaAACGTtat	AP2; B3
ZaNF-YA2	652	-	gaaACGTTat	AP2; B3
ZaNF-YA2	712	+	gaAACGTttc	AP2; B3
ZaNF-YA2	712	-	gaaACGTTtc	AP2; B3
ZaNF-YA2	762	+	gaAACGTaaa	AP2; B3
ZaNF-YA2	817	-	aCAACAta	AP2; B3; RAV
ZaNF-YA2	1901	+	taTGTTGa	AP2; B3; RAV
ZaNF-YA2	236	-	ttTGTTGt	AP2; B3; RAV
ZaNF-YA2	817	+	aCAACAta	AP2; B3; RAV
ZaNF-YA2	1210	-	ttTGTTGt	AP2; B3; RAV
ZaNF-YA2	1901	-	taTGTTGa	AP2; B3; RAV
ZaNF-YA2	308	-	AATTTtttt	AT-Hook
ZaNF-YA2	443	+	aaaaAAATT	AT-Hook
ZaNF-YA2	1323	+	ctaaAAATT	AT-Hook
ZaNF-YA2	1492	-	AATTTttta	AT-Hook
ZaNF-YA2	1354	-	atatTATATa	AT-Hook
ZaNF-YA2	1358	+	tATATAaatt	AT-Hook
ZaNF-YA2	81	+	tcgcATAAA	AT-Hook
ZaNF-YA2	183	-	TTTATttat	AT-Hook
ZaNF-YA2	187	-	TTTATttat	AT-Hook
ZaNF-YA2	191	-	TTTATtttg	AT-Hook
ZaNF-YA2	746	+	taaaATAAA	AT-Hook
ZaNF-YA2	888	-	TTTATtcgt	AT-Hook
ZaNF-YA2	918	-	TTTATttcc	AT-Hook
ZaNF-YA2	1338	-	TTTATttat	AT-Hook
ZaNF-YA2	1424	-	TTTATtata	AT-Hook
ZaNF-YA2	1069	+	gaaaAATAA	AT-Hook
ZaNF-YA2	1404	-	TTATTttat	AT-Hook
ZaNF-YA2	1413	+	ataAAAAT	AT-Hook
ZaNF-YA2	1421	-	ATTTTtat	AT-Hook
ZaNF-YA2	191	-	TTTATttt	AT-Hook
ZaNF-YA2	747	+	aaaATAAA	AT-Hook
ZaNF-YA2	1424	-	TTTATtat	AT-Hook
ZaNF-YA2	1415	+	aaaAATAT	AT-Hook
ZaNF-YA2	1419	-	ATATTttt	AT-Hook
ZaNF-YA2	191	-	ttTATTTt	AT-Hook
ZaNF-YA2	747	+	aAAATAaa	AT-Hook
ZaNF-YA2	1350	+	taataTATTA	AT-Hook
ZaNF-YA2	1350	-	TAATAtatta	AT-Hook
ZaNF-YA2	309	-	ATTTTttt	AT-Hook
ZaNF-YA2	432	-	ATTTTttt	AT-Hook
ZaNF-YA2	443	+	aaaAAAAT	AT-Hook
ZaNF-YA2	1717	-	caaaATTGCa	AT-Hook
ZaNF-YA2	1723	+	tGCAATagca	AT-Hook
ZaNF-YA2	182	-	attTATTT	AT-Hook
ZaNF-YA2	186	-	attTATTT	AT-Hook
ZaNF-YA2	190	-	attTATTT	AT-Hook
ZaNF-YA2	739	-	attTATTT	AT-Hook
ZaNF-YA2	917	-	attTATTT	AT-Hook
ZaNF-YA2	1458	-	attTATTT	AT-Hook
ZaNF-YA2	129	-	ATTATctaa	AT-Hook
ZaNF-YA2	1070	+	aaaaATAAT	AT-Hook
ZaNF-YA2	1229	-	ATTATcttg	AT-Hook
ZaNF-YA2	1356	-	ATTATataa	AT-Hook
ZaNF-YA2	1403	-	ATTATttta	AT-Hook
ZaNF-YA2	1435	-	ATTATttaa	AT-Hook
ZaNF-YA2	1455	-	ATTATttat	AT-Hook
ZaNF-YA2	87	+	aaAAAATa	AT-Hook
ZaNF-YA2	199	-	gATTTTtt	AT-Hook
ZaNF-YA2	308	-	aATTTTtt	AT-Hook
ZaNF-YA2	366	-	gATTTTtt	AT-Hook
ZaNF-YA2	431	-	gATTTTtt	AT-Hook
ZaNF-YA2	444	+	aaAAAATt	AT-Hook
ZaNF-YA2	1405	-	tATTTTat	AT-Hook
ZaNF-YA2	1492	-	aATTTTtt	AT-Hook
[truncated: 99,615 more rows]

## Sheet: Statistics
Statistics on the number of cis-elements on the promoter of the ZaNF-Y genes using PlantPAN 4.0
	ZaNF-YA1	ZaNF-YA2	ZaNF-YA3	ZaNF-YA4	ZaNF-YA5	ZaNF-YA6	ZaNF-YA7	ZaNF-YA8	ZaNF-YA9	ZaNF-YA10	ZaNF-YA11	ZaNF-YA12	ZaNF-YA13	ZaNF-YA14	ZaNF-YA15	ZaNF-YA16	ZaNF-YA17	ZaNF-YA18	ZaNF-YA19	ZaNF-YA20	ZaNF-YB1	ZaNF-YB2	ZaNF-YB3	ZaNF-YB4	ZaNF-YB5	ZaNF-YB6	ZaNF-YB7	ZaNF-YB8	ZaNF-YB9	ZaNF-YB10	ZaNF-YB11	ZaNF-YB12	ZaNF-YB13	ZaNF-YB14	ZaNF-YB15	ZaNF-YB16	ZaNF-YB17	ZaNF-YB18	ZaNF-YB19	ZaNF-YB20	ZaNF-YB21	ZaNF-YB22	ZaNF-YB23	ZaNF-YB24	ZaNF-YB25	ZaNF-YB26	ZaNF-YB27	ZaNF-YB28	ZaNF-YB29
AP2	145	137	146	135	175	115	95	114	135	142	115	180	150	127	138	133	140	86	144	147	135	242	174	153	125	145	148	144	152	150	176	134	121	151	129	122	130	196	125	163	185	180	180	155	147	143	116	164	114
ARF	0	1	2	2	3	3	3	0	1	4	2	2	2	0	6	0	3	0	7	3	5	0	2	2	2	1	2	0	2	2	6	4	4	1	3	5	0	0	0	3	5	2	2	1	1	1	0	3	5
AT-Hook	125	89	48	61	170	74	59	116	142	180	98	167	126	117	110	119	50	148	130	114	97	169	97	76	125	115	137	114	153	122	57	59	44	84	96	42	128	178	122	66	41	67	66	103	145	134	139	71	57
B3	4	0	20	22	1	5	0	20	1	0	4	1	1	8	7	12	0	6	11	1	3	3	7	3	26	7	5	2	1	1	10	1	3	8	7	2	1	5	5	5	1	2	1	4	1	1	5	2	0
BES1	13	0	1	1	0	1	1	0	0	0	0	0	0	9	0	0	12	0	0	0	9	0	4	4	2	8	0	0	0	0	1	12	5	8	0	0	4	0	5	1	4	5	5	0	8	8	5	1	1
bHLH	242	40	34	34	44	39	32	31	44	27	32	37	37	170	32	40	267	36	54	15	171	29	97	111	54	180	51	41	36	45	66	258	112	178	41	46	131	41	99	68	123	113	113	35	167	177	91	39	46
bZIP	201	85	123	118	66	87	67	98	108	111	84	89	101	130	97	98	161	42	65	68	161	82	115	120	120	148	158	83	98	85	114	170	117	137	121	65	102	101	102	167	139	133	132	96	194	196	105	103	79
C2H2	9	5	20	28	9	22	14	9	9	11	16	5	15	6	18	6	7	4	13	7	26	13	9	13	19	3	5	8	13	12	13	14	15	16	18	19	18	23	13	12	14	11	11	20	9	8	7	12	12
CAMTA	0	0	0	0	0	0	0	0	6	0	4	0	0	0	4	0	6	0	2	2	0	0	0	0	5	6	0	8	0	0	0	2	6	12	0	6	4	0	8	0	4	0	0	0	0	0	8	0	4
CSD	6	2	1	1	3	1	2	3	1	4	1	1	0	5	3	6	0	2	6	5	3	1	3	2	4	3	0	2	1	1	1	0	0	2	2	1	2	2	3	0	0	2	2	1	2	3	5	0	0
Dehydrin	17	20	14	15	10	28	21	24	33	11	23	8	14	28	21	20	39	27	30	18	41	18	17	23	12	14	8	16	44	51	37	46	48	23	24	43	38	15	35	16	20	16	17	20	16	18	39	17	18
Dof	131	47	60	60	77	53	59	64	54	78	80	82	57	65	59	67	41	64	52	81	30	69	57	52	79	60	50	63	63	65	51	42	50	55	64	60	33	88	50	78	68	62	63	69	76	69	53	54	58
E2F	1	2	0	0	1	0	0	0	2	0	2	1	0	2	4	0	0	0	0	1	2	0	0	0	0	0	0	5	1	1	0	0	2	4	2	4	3	3	2	2	2	0	0	2	1	1	2	1	2
EIN3	0	1	6	6	1	3	1	1	2	5	3	4	3	5	1	3	1	4	2	2	0	6	1	4	16	3	7	10	2	2	9	1	3	3	3	10	3	7	6	8	3	2	2	0	1	1	6	11	0
FAR1	0	0	0	0	0	2	0	0	2	0	2	0	0	0	2	0	0	0	1	1	0	0	0	0	1	0	0	1	1	1	0	2	1	6	0	2	2	0	5	0	1	0	0	1	0	0	5	0	0
GATA	100	116	134	139	121	93	70	75	146	82	109	83	81	113	84	85	144	39	65	64	96	88	124	121	102	100	147	99	101	98	134	104	121	122	135	99	82	104	123	80	113	102	103	129	107	98	120	180	107
GRAS	0	0	0	0	0	0	0	0	0	0	1	0	1	0	0	0	2	0	0	1	0	0	0	0	0	0	0	1	1	0	1	1	1	1	0	0	0	0	0	1		1	1	0	0	0	0	0	1
GRF	0	2	0	0	0	1	0	0	2	0	0	0	1	0	0	0	0	0	0	2	0	0	0	0	1	0	0	0	0	1	1	0	0	2	1	2	1	0	1	0	0	0	0	3	0	0	1	0	0
HB-PHD	0	2	1	3	4	1	2	1	2	2	1	2	2	3	0	2	0	1	4	5	4	5	2	2	0	0	3	2	1	2	3	1	1	1	4	0	0	1	1	5	4	2	2	4	4	4	2	2	3
HD-ZIP	29	31	21	23	32	15	10	19	24	39	18	30	31	9	29	52	31	11	21	18	34	24	28	29	32	33	55	25	28	31	18	26	25	28	41	4	11	29	27	25	19	16	17	21	26	25	25	27	25
HSF	3	1	2	2	4	0	1	1	5	3	1	7	0	4	0	1	1	0	1	0	3	2	0	0	1	1	4	1	0	0	1	2	1	0	2	2	1	1	4	1	2	1	1	3	1	1	4	0	1
LBD	0	2	0	0	0	0	0	0	2	0	0	0	0	0	0	0	0	1	0	0	2	2	0	0	0	0	0	1	2	0	0	1	1	0	0	4	2	0	4	0	0	0	0	1	0	0	4	0	0
MADF	0	0	0	0	0	1	7	3	1	6	0	5	3	1	0	3	6	0	3	9	4	9	3	4	9	4	1	1	5	5	7	6	10	4	6	4	2	9	1	7	2	0	0	0	3	2	1	2	8
MADS	18	11	8	0	18	11	21	7	12	29	11	33	13	6	18	18	2	32	7	5	4	28	4	29	42	11	6	15	10	8	20	5	4	2	1	3	2	14	62	12	6	3	3	9	2	4	53	7	24
MYB	80	78	88	87	91	50	47	63	155	115	100	83	91	60	80	63	93	20	37	38	62	58	94	96	69	71	72	55	67	69	74	68	59	62	76	57	35	99	91	60	55	102	104	143	97	81	88	87	56
NAC	13	9	6	4	10	3	6	8	8	4	4	5	15	6	19	11	13	4	9	8	7	8	8	12	8	9	10	5	11	8	10	14	13	15	6	8	5	6	12	5	16	3	3	4	3	2	12	13	20
NF-Y	53	82	72	72	64	87	41	60	98	65	69	80	68	81	68	65	80	48	80	73	70	62	85	87	61	76	66	66	65	61	87	93	67	75	74	65	86	86	60	62	77	83	76	67	87	83	58	78	91
SBP	16	10	41	36	21	12	15	23	21	18	37	27	49	6	12	11	103	14	3	24	13	8	16	20	3	8	39	30	32	10	31	59	73	19	2	27	16	25	13	36	40	52	63	19	11	9	12	40	36
SRS	1	0	3	4	1	2	1	0	0	4	0	0	0	2	1	4	0	1	2	0	1	1	3	4	0	0	3	0	2	3	4	1	2	3	9	6	4	3	3	7	4	5	7	3	2	2	5	0	1
Storekeeper	0	0	0	0	0	0	1	4	0	0	0	0	1	4	0	0	0	9	0	0	4	0	0	0	1	0	0	0	0	1	0	0	0	0	1	8	0	0	0	0	0	0	0	0	0	0	0	0	0
TALE	10	15	23	22	12	14	14	13	9	13	18	13	15	18	11	9	17	4	12	8	13	13	12	13	17	12	14	10	14	15	13	25	19	20	13	7	12	10	7	25	13	20	20	8	14	16	10	13	8
TBP	36	23	7	7	143	14	18	23	33	38	14	135	75	21	18	19	14	69	60	47	19	207	47	25	48	12	50	59	67	41	32	7	15	44	32	19	21	167	26	38	30	28	28	84	34	30	25	39	19
TCP	0	2	1	1	0	12	4	6	17	1	5	0	10	6	3	5	19	33	10	2	25	13	6	8	13	10	2	12	12	17	8	32	6	15	7	23	20	6	42	9	9	12	12	1	4	11	42	10	14
TCR	11	19	5	9	18	23	8	9	10	13	17	24	19	20	13	46	13	27	26	26	40	32	13	22	20	22	31	23	12	13	4	16	0	22	14	7	18	32	10	20	15	17	17	22	12	16	10	16	9
Trihelix	56	62	60	54	53	30	44	56	47	53	47	56	55	39	56	56	69	26	35	72	52	45	64	70	60	53	53	50	41	40	49	55	69	57	48	50	49	45	58	49	54	61	59	46	64	61	54	54	42
VOZ	0	2	0	0	0	0	1	1	0	0	1	0	0	0	2	0	1	0	1	1	0	1	0	0	1	0	0	3	0	0	1	3	3	2	1	7	1	0	2	0	2	1	1	1	0	0	1	0	0
WOX	8	11	9	9	19	8	2	4	5	7	7	9	14	11	6	12	12	12	5	7	4	11	10	8	7	28	19	18	9	11	7	18	14	12	19	2	4	11	10	14	14	4	4	10	16	14	11	13	9
WRKY	25	77	20	12	96	24	58	8	28	60	37	32	25	71	16	36	34	5	24	2	25	38	7	45	90	18	33	17	60	60	18	9	23	69	78	6	36	13	48	23	31	20	20	6	34	37	50	32	40
YABBY	5	2	1	0	13	6	4	3	5	18	8	15	10	5	11	5	10	8	7	3	7	8	13	13	4	15	15	4	4	4	5	7	1	2	12	3	2	14	7	6	5	4	4	10	12	12	10	11	4
ZF-HD	54	32	31	34	55	52	27	53	53	70	41	51	64	37	52	58	52	43	47	34	46	57	69	63	37	67	82	36	52	54	48	47	19	46	76	25	44	49	32	61	40	42	42	52	81	75	34	37	35
[truncated: 18 more columns]
