# Supplementary material for: Genome-wide identification and characterization of the NF-Y proteins in Zanthoxylum armatum
Source: PeerJ. 2025 Jun 26;13:e19142. doi: 10.7717/peerj.19142 (PMC12206434; doi:10.7717/peerj.19142)
Supplement: Supplemental Information 7 [file peerj-13-19142-s007.xlsx]

## Sheet: Sheet1
File S7. Primers for qRT-PCR
Name	Sequence
ZaNF-YA1_qF	CATTCCACCGGGCACAGT
ZaNF-YA1_qR	TTCCCCCAGCCAAAGCAG
ZaNF-YA2_qF	CACCTCAAGTCGGGGCAG
ZaNF-YA2_qR	CCATTGGTTGTCCCCCGT
ZaNF-YA3_qF	AATGGCAATGGCAACGGC
ZaNF-YA3_qR	CTTTCGCTTTGCTGCCCC
ZaNF-YA4_qF	ACCCTCACCATCCGGGAT
ZaNF-YA4_qR	CTTTCGCTTTGCTGCCCC
ZaNF-YA5_qF	TATGCACCATTCGCGGCA
ZaNF-YA5_qR	GGCTGAGGCTGTTGCTGA
ZaNF-YA8_qF	TGTGCGTCGCATCCATGT
ZaNF-YA8_qR	AAGGGGCAAAGGCATGGG
ZaNF-YA9_qF	GCTCAGCCCAGCATCACA
ZaNF-YA9_qR	AAGCCACTGGTGCCATGG
ZaNF-YA11_qF	CCTGCCGGAGTTTGGGTT
ZaNF-YA11_qR	GTGCAGGTTGCCATTGCC
ZaNF-YA12_qF	GGGATCATCAGGCGTCGG
ZaNF-YA12_qR	GTCCACCACACCCCCTTG
ZaNF-YA15_qF	TCCAGCAGCAGGAGTTTGG
ZaNF-YA15_qR	GGTGCAGGTTGCCATTGC
ZaNF-YA16_qF	CAGGCAGGGTAATGGGGC
ZaNF-YA16_qR	CGAGTTGGAGGGCATGCA
ZaNF-YA17_qF	GTGCCGCTGCCTCTTGAA
ZaNF-YA17_qR	GCTTCAAGCTTGGCACGG
ZaNF-YA18_qF	TCAAGCAGCGGCAACAGA
ZaNF-YA18_qR	TGGGTGCTTCTGCTGCTC
ZaNF-YA19_qF	GAAGGGCTAGGGGTTGCG
ZaNF-YA19_qR	TCCAGTGCCATCGGAGGA
ZaNF-YA20_qF	GGGAAGCATGCGGAGGAG
ZaNF-YA20_qR	CTTCGCCCGTCAGAGCAA
ZaNF-YB1_qF	TGGGGAGGGAGAAGGACG
ZaNF-YB1_qR	AAACCCCACCACCAGCAC
ZaNF-YB5_qF	TTCGTCACCGGTGAAGCC
ZaNF-YB5_qR	AAGAGGGAGAGGGGCTCG
ZaNF-YB6_qF	ATAAGGACGTGCCGCCTC
ZaNF-YB6_qR	CCCCCAGAGCCATACACG
ZaNF-YB7_qF	CCAACGTTGGCCGGATAA
ZaNF-YB7_qR	TCGCCTTTCCTTTCTGCACT
ZaNF-YB8_qF	GAGCTCTGCCTGGCCAAA
ZaNF-YB8_qR	TCATGTGCTGCCCCTGTG
ZaNF-YB9_qF	TGAGACAAAACGGCGCCA
ZaNF-YB9_qR	CTTTGCATTCGCCGGCAG
ZaNF-YB10_qF	GGACCGAACAGCAGCGAT
ZaNF-YB10_qR	CTTTGCATTCGCCGGCAG
ZaNF-YB11_qF	CGCCAACCAATGCATCGG
ZaNF-YB11_qR	TGCTGGAGCTCACATGCA
ZaNF-YB12_qF	GGGTGGGGATGGATCTGC
ZaNF-YB12_qR	GCGCACCCTGAAGAGCAT
ZaNF-YB13_qF	AAGATCGCCAAGGACGCC
ZaNF-YB13_qR	ATCACTTGCCTCGCTGGT
ZaNF-YB15_qF	TAACGAGTCAGGTGGCGG
ZaNF-YB15_qR	GCATTAGCAGGCAACGCT
ZaNF-YB16_qF	CCTTCTCTCGCGCCCTTT
ZaNF-YB16_qR	ACTTTGGTCGCCGCTCTC
ZaNF-YB18_qF	CCCTAACCATGCTGCTGCT
ZaNF-YB18_qR	TGGTACCTCCATTGCCACG
ZaNF-YB19_qF	AATGGGGCCGCAATGACA
ZaNF-YB19_qR	GGTTAGGGCCTGGTTGCT
ZaNF-YB20_qF	TCCAATTGCCAACGTGGG
ZaNF-YB20_qR	GACGCCTCACCCGTTACA
ZaNF-YB21_qF	TGGAGGGTGAGACCAGGG
ZaNF-YB21_qR	TTTGGCCAGGCAGAGCTC
ZaNF-YB24_qF	GACTCGCTTGGGGCACAA
ZaNF-YB24_qR	AAAGCTCCTGCCCCCAAA
ZaNF-YB28_qF	GCAGGATTGCTCACCCGA
ZaNF-YB28_qR	CGTGGCGGAGAGGTAGTG
ZaNF-YB29_qF	TTCTCCAATCCTCGCGCC
ZaNF-YB29_qR	TTGTTCGCGGACGTTCGA
ZaNF-YC1_qF	AGCAGCAGCCTGTGATGG
ZaNF-YC1_qR	GAGGGATGGCCATGGCAG
ZaNF-YC2_qF	ATGTCCCACCGCAGCATC
ZaNF-YC2_qR	CCAGGTCGAGGCTGTTGG
ZaNF-YC4_qF	CCAAAGCCTGCGAGCTCT
ZaNF-YC4_qR	TAATGGCGGCAGCGATGT
ZaNF-YC5_qF	ATTTCTGGCCACCGTGCA
ZaNF-YC5_qR	ATACACGGGTGCCATGCC
ZaNF-YC6_qF	TGGCGGACAACCCACATC
ZaNF-YC6_qR	GGAATTGCCCCAGCCGAT
ZaNF-YC9_qF	CGGTTCCCATGGTGGCTT
ZaNF-YC9_qR	GGTGAAGGTGCTGGGCTT
ZaNF-YC10_qF	TGTCACATCTGCTGGGGC
ZaNF-YC10_qR	TGCTGTTGCTGCTGGTGA
ZaNF-YC11_qF	TACCCACCTCAGCCTGCA
ZaNF-YC11_qR	CTTGGCGCTGGTAGGACC
ZaNF-YC12_qF	TCTGGTGGTCCCAACCCT
ZaNF-YC12_qR	CAGCTGAGCACCTCCTGG
ZaNF-YC13_qF	AGCAAGGACATGGCGGAC
ZaNF-YC13_qR	ACTGGTCCAGGGTTGGGA
ZaNF-YC14_qF	GGGCCAGGTTACCAGCAG
ZaNF-YC14_qR	ATGCTGTGGAGCCGTACG
ZaNF-YC15_qF	GGGCCAGGTTACCAGCAG
ZaNF-YC15_qR	GCAGTATGGGGTTCGGGC
ZaNF-YC16_qF	CCCCAGCCTCCCTCTTCT
ZaNF-YC16_qR	CTTGGCGCTGGTAGGACC
ZaNF-YC17_qF	AAGGCAAACCGCAGTCCA
ZaNF-YC17_qR	ACCTCGTCCTCGGACTCA
ZaGAPDH-F	TGGTGAGAAGCCCGTTGC
ZaGAPDH-R	CAACGTACTCGGCTCCGG
