# Supplementary material for: Genome-wide identification and characterization of the NF-Y proteins in Zanthoxylum armatum
Source: PeerJ. 2025 Jun 26;13:e19142. doi: 10.7717/peerj.19142 (PMC12206434; doi:10.7717/peerj.19142)
Supplement: Supplemental Information 8 [file peerj-13-19142-s008.xlsx]

## Sheet: Sheet1
File S8. Raw data of qRT-PCR
different tissues	Biological replicate	Ct value
		GAPDH	ZaNF-YA1	ZaNF-YA2	ZaNF-YA3	ZaNF-YA4	ZaNF-YA5	ZaNF-YA8	ZaNF-YA9	ZaNF-YA11	ZaNF-YA12	ZaNF-YA15	ZaNF-YA16	ZaNF-YA17	ZaNF-YA18	ZaNF-YA19	ZaNF-YA20	ZaNF-YB1	ZaNF-YB5	ZaNF-YB6	ZaNF-YB7	ZaNF-YB8	ZaNF-YB9	ZaNF-YB10	ZaNF-YB11	ZaNF-YB12	ZaNF-YB13	ZaNF-YB15	ZaNF-YB16	ZaNF-YB18	ZaNF-YB19	ZaNF-YB20	ZaNF-YB21	ZaNF-YB24	ZaNF-YB28	ZaNF-YB29	ZaNF-YC1	ZaNF-YC2	ZaNF-YC4	ZaNF-YC5	ZaNF-YC6	ZaNF-YC9	ZaNF-YC10	ZaNF-YC11	ZaNF-YC12	ZaNF-YC13	ZaNF-YC14	ZaNF-YC15	ZaNF-YC16
female flowers	1	19.8086	25.4914	28.3682	32.9515	25.4856	28.1817	26.1318	24.8836	28.9193	24.6897	25.4772	26.4073	31.207	25.4783	29.9469	25.3233	25.6518	34.9418	25.1255	31.2566	21.672	34.7236	26.0033	29.8138	25.5144	24.6856	29.5894	25.5664	29.63	24.9691	31.4745	24.1433	29.4356	23.1165	25.9866	23.3955	23.0903	23.0145	29.6072	26.2201	23.5427	24.0227	24.4849	23.7261	24.4229	25.9727	25.9728	27.0798
	2	19.7998	26.2125	28.556	32.0718	26.0181	28.2568	25.4923	24.8073	28.5487	24.6171	25.3155	26.285	31.8424	25.3848	29.8406	25.5328	25.7274	34.1423	25.1038	32.6802	22.0907	33.345	26.1312	30.2977	25.1644	24.5422	29.7213	25.5727	30.2012	25.0189	31.4937	24.2401	29.6592	23.0978	25.7184	23.342	23.3125	23.0733	29.3406	26.1529	23.7819	24.0504	24.321	24.2762	24.1277	26.0012	25.8751	27.1304
	3	19.9498	26.1791	28.5761	33.1828	26.0207	28.6662	25.8614	24.7686	28.5366	25.1259	25.4189	26.1326	31.8899	25.371	29.7789	26.2366	25.6964	36.1712	25.1046	31.5259	22.7844	33.0982	26.0551	29.8685	25.1376	24.4515	29.6864	26.0757	30.194	25.3411	31.3909	24.3753	29.5238	23.1904	26.2383	24.0065	23.2934	23.4402	29.6259	26.1922	23.4772	24.3042	23.7167	23.9645	24.065	25.9904	25.9402	27.0757
stems	1	20.7968	25.9382	29.3459	33.0939	26.2882	29.7191	26.0573	26.0088	30.4109	26.5205	24.3571	28.0502	32.0875	26.797	30.543	25.5807	27.1048	34.3677	24.3451	30.3498	23.9839	31.3222	25.5003	30.3535	25.9056	25.7786	29.6462	25.8731	31.4258	25.0307	31.2535	24.9705	30.1139	25.209	26.0177	26.3585	24.1698	24.1198	30.5263	27.445	25.1974	24.1806	23.7219	24.0639	24.3579	27.408	26.9661	28.6373
	2	20.8414	25.7142	29.213	33.1032	26.4783	29.9281	26.6998	26.037	30.7323	26.4322	24.137	27.9041	32.3004	26.8681	30.5036	25.3068	27.0207	34.4162	24.5146	30.36	23.7714	31.726	25.6985	30.6495	26.0495	25.6217	29.7858	25.8785	31.0193	24.9883	31.5815	24.8282	30.2185	25.1556	26.1679	26.4701	24.0229	24.1519	30.0282	27.4663	25.1665	24.2051	23.8174	24.134	24.2704	27.36	26.8764	28.6523
	3	20.7677	25.7597	29.198	31.4323	26.1751	29.8854	26.2387	26.148	30.4958	26.2023	24.5043	28.0216	32.3453	26.8052	30.7277	25.3409	27.2066	35.2954	24.3525	30.3945	23.9654	32.0231	25.4238	30.5122	26.0713	25.7519	29.2979	26.0216	31.0393	24.8776	31.3739	25.263	30.0433	25.1964	26.044	25.9994	24.104	24.0105	30.406	27.5582	25.1049	24.1174	23.9254	24.0549	24.237	27.4311	26.9108	28.4822
leaves	1	20.1633	25.4559	28.0618	33.5226	29.1535	29.1264	25.2727	25.0208	30.6424	26.5764	26.6801	27.071	33.0097	25.426	30.2327	26.4388	23.5179	32.6648	22.4461	32.881	24.0432	36.1663	22.7485	29.1961	24.4234	24.3739	25.4829	26.027	29.2505	23.9267	31.4172	22.993	28.9123	23.4495	26.3827	22.0653	21.9463	22.4305	29.0229	26.032	23.1461	23.3672	23.1582	23.0607	23.2335	26.3232	26.2683	26.9535
	2	20.1852	25.7763	28.0676	33.8502	29.0286	29.1568	25.6139	24.9801	30.6835	26.4394	26.7484	26.2957	34.0861	25.6024	30.0165	26.2268	23.6751	32.0127	22.2621	31.7105	23.9743	35.4975	22.9086	29.2057	24.322	24.3683	25.3627	26.1151	29.2851	23.8089	31.6184	22.9665	28.9481	23.4307	26.1274	21.8091	22.0307	22.4258	29.2689	26.0584	23.2291	23.3868	23.1548	23.0153	23.3739	26.2493	26.2286	26.9866
	3	20.4615	25.8535	28.1502	33.208	29.0732	29.1617	25.7747	25.0271	30.2953	26.4402	26.6325	27.0048	33.7324	25.4621	30.2283	26.9615	23.6573	32.2022	22.2544	32.7242	24.1888	36.8607	22.8274	29.2631	24.3853	24.2728	25.4129	26.0703	29.1579	23.8777	31.406	23.0239	29.1043	23.3992	26.2278	22.0756	21.9178	22.4181	29.294	26.1065	23.288	23.3935	23.2115	23.0778	23.2731	26.2053	26.1888	27.1669
young fruits	1	20.9652	25.8777	27.8983	33.2654	26.1734	29.3617	25.6399	24.4733	30.6881	26.564	26.2215	26.2617	31.4751	24.7458	29.192	25.4613	26.544	35.2374	25.3286	31.2606	22.1608	33.1982	24.4792	28.3965	25.4325	24.5143	28.6054	25.9385	30.3051	24.9727	31.3626	24.7139	29.2752	24.3494	26.0737	20.8825	23.7169	23.2902	29.8972	25.4774	24.4321	24.0398	23.2999	24.6047	24.031	26.4973	25.7548	27.2432
	2	20.7016	26.0979	27.8598	33.2635	25.822	29.3947	25.3146	24.6485	31.111	26.5902	26.555	26.2675	32.0379	24.9817	29.2096	25.4612	26.6909	35.6517	25.1319	31.1126	22.6243	33.2076	24.1732	28.2563	25.3744	24.5632	28.5199	25.9554	30.0783	24.9617	31.3503	24.8869	29.2654	24.3468	25.9081	21.0523	23.7782	23.3425	30.0394	25.3777	24.4685	23.9371	23.2247	24.5801	24.0474	26.4313	25.7703	27.1098
	3	20.756	26.1755	27.937	32.9354	26.1328	29.7113	25.7382	24.3863	30.3943	26.575	26.3332	26.4019	31.8242	24.631	29.0638	25.731	26.3028	35.5261	25.2164	31.0214	22.8468	33.4246	24.7789	28.1983	25.2744	24.5657	28.4434	25.9698	29.8802	25.0156	31.926	24.7635	29.3609	24.4264	25.9768	21.4844	23.838	23.318	30.032	24.1838	24.4548	24.0305	23.3124	24.5004	24.1174	26.538	25.766	27.1334
[truncated: 1 more columns]
