# Supplementary material for: Genome-wide identification and characterization of the NF-Y proteins in Zanthoxylum armatum
Source: PeerJ. 2025 Jun 26;13:e19142. doi: 10.7717/peerj.19142 (PMC12206434; doi:10.7717/peerj.19142)
Supplement: Supplemental Information 9 [file peerj-13-19142-s009.xlsx]

## Sheet: Z. armatum
File S9. Details of NF-Y in four species.
ID	Name	Location	Strand	CDS(bp)	protein(aa)	Mw（kDa)	pI	Subcellular localization
Zardc00391.t1	ZaNF-YA1	1:8742693...8747172	+	1020	339	36.92	6.49	Nucleus
Zardc24996.t1	ZaNF-YA10	17:64741578...64744338	+	957	318	35.02	9.68	Nucleus
Zardc25782.t1	ZaNF-YA11	18:40937831...40940328	+	999	332	36.55	8.94	Nucleus
Zardc27486.t1	ZaNF-YA12	19:28075709...28079599	+	957	318	34.75	9.31	Nucleus
Zardc29070.t1	ZaNF-YA13	20:24318406...24324905	+	936	311	34	9.37	Nucleus
Zardc29536.t1	ZaNF-YA14	20:49768339...49769883	+	612	203	22.27	9.89	Nucleus
Zardc30673.t1	ZaNF-YA15	21:65598119...65600832	+	1008	335	37.13	7.83	Nucleus
Zardc39364.t1	ZaNF-YA16	28:30795977...30798006	+	975	324	35.86	8.27	Nucleus
Zardc42135.t1	ZaNF-YA17	31:36292822...36294748	+	684	227	25.59	9.29	Nucleus
Zardc47788.t1	ZaNF-YA18	un3123:1545...5989	+	654	217	24.5	9.47	Nucleus
Zardc51606.t1	ZaNF-YA19	un8879:5626...7428	+	930	309	34.08	9.25	Nucleus
Zardc02019.t1	ZaNF-YA2	1:96254432...96258602	+	459	152	16.75	8.37	Nucleus
Zardc55146.t1	ZaNF-YA20	un14415:3019...5085	-	897	298	32.04	7.29	Nucleus
Zardc03121.t1	ZaNF-YA3	2:14604214...14609550	+	951	316	35.04	9.23	Nucleus
Zardc03815.t1	ZaNF-YA4	2:55338075...55343431	-	945	314	34.91	9.23	Nucleus
Zardc12046.t1	ZaNF-YA5	7:55423106...55427254	-	951	316	34.53	9.16	Nucleus
Zardc15561.t1	ZaNF-YA6	10:24749064...24753905	-	813	270	30.62	9.53	Nucleus
Zardc19199.t1	ZaNF-YA7	13:3213390...3216143	-	957	318	34.96	9.74	Nucleus
Zardc23036.t1	ZaNF-YA8	16:21561851...21563910	+	966	321	35.04	7.49	Nucleus
Zardc23708.t1	ZaNF-YA9	16:67573812...67579297	+	729	242	26.96	8.92	Nucleus
Zardc01252.t1	ZaNF-YB1	1:66362822...66363785	+	693	230	23.8	6.86	Nucleus
Zardc16329.t1	ZaNF-YB10	10:74604601...74606393	+	621	206	21.61	8.56	Nucleus
Zardc16775.t1	ZaNF-YB11	11:14844788...14846800	-	567	188	21.25	6.34	Nucleus
Zardc17774.t1	ZaNF-YB12	12:8397970...8403230	-	633	210	23.11	5.94	Nucleus
Zardc17778.t1	ZaNF-YB13	12:8904019...8909202	-	633	210	23.23	6.19	Nucleus
Zardc23807.t1	ZaNF-YB14	16:73337938...73342137	-	471	156	17.33	4.53	Nucleus
Zardc23890.t1	ZaNF-YB15	16:77147816...77148439	+	552	183	20.06	6.49	Nucleus
Zardc27061.t1	ZaNF-YB16	19:9385577...9393841	+	660	219	24.34	7.01	Nucleus
Zardc28699.t1	ZaNF-YB17	20:4655216...4657237	+	726	241	26.85	6.49	Nucleus
Zardc30065.t1	ZaNF-YB18	21:25173998...25174659	-	522	173	19.27	5.44	Nucleus
Zardc32065.t1	ZaNF-YB19	22:23941484...23945442	-	471	156	17.2	4.68	Nucleus
Zardc02866.t1	ZaNF-YB2	2:6234097...6234891	+	498	165	18.36	5.22	Nucleus
Zardc34227.t1	ZaNF-YB20	24:2332560...2333054	-	429	142	15.79	6.63	Nucleus
Zardc37513.t1	ZaNF-YB21	26:44817405...44821265	-	582	193	20.9	6.62	Nucleus
Zardc40757.t1	ZaNF-YB22	30:11566952...11567692	-	345	114	12.64	4.89	Nucleus
Zardc41243.t1	ZaNF-YB23	30:31059559...31060299	-	345	114	12.63	4.89	Nucleus
Zardc44516.t1	ZaNF-YB24	un203:251609...253092	+	549	182	20.08	6.17	Nucleus
Zardc46398.t1	ZaNF-YB25	un667:38918...40337	+	555	184	20.07	5.12	Nucleus
Zardc46403.t1	ZaNF-YB26	un668:91843...93199	-	558	185	20.18	4.89	Nucleus
Zardc49594.t1	ZaNF-YB27	un6114:1755...5714	-	474	157	17.39	4.62	Nucleus
Zardc50176.t1	ZaNF-YB28	un7151:3639...5865	-	594	197	22.54	5.46	Nucleus
Zardc50481.t1	ZaNF-YB29	un7416:24023...26499	+	621	206	22.79	7.34	Nucleus
Zardc04719.t1	ZaNF-YB3	3:26147116...26147640	+	444	147	16.69	5.17	Nucleus
Zardc53350.t1	ZaNF-YB30	un11833:7613...11570	+	471	156	17.26	4.62	Nucleus
Zardc04742.t1	ZaNF-YB4	3:27402454...27403385	+	582	193	21.71	5.28	Nucleus
Zardc07335.t1	ZaNF-YB5	4:59954021...59955290	-	651	216	24.04	6.01	Nucleus
Zardc07340.t1	ZaNF-YB6	4:60077284...60077910	-	549	182	20.07	5.78	Nucleus
Zardc08835.t1	ZaNF-YB7	5:65202125...65202832	+	366	121	13.12	5.1	Cytoplasmic
Zardc09563.t1	ZaNF-YB8	6:16188474...16191381	+	525	174	18.79	5.74	Nucleus
Zardc16260.t1	ZaNF-YB9	10:73255695...73257508	-	681	226	23.93	7.91	Nucleus
Zardc03336.t1	ZaNF-YC1	2:28799066...28800087	+	879	292	33.16	6.15	Nucleus
Zardc34600.t1	ZaNF-YC10	24:7304134...7305036	+	747	248	27.34	6.61	Cytoplasmic
Zardc37300.t1	ZaNF-YC11	26:38978291...38981909	+	933	310	35.25	6.55	Nucleus
Zardc37796.t1	ZaNF-YC12	27:1612554...1613658	+	804	267	29.47	7.08	Cytoplasmic
Zardc37797.t1	ZaNF-YC13	27:1632760...1633861	+	804	267	29.46	6.77	Cytoplasmic
Zardc38429.t1	ZaNF-YC14	27:50161251...50171882	+	861	286	31.62	5.05	Nucleus
Zardc38432.t1	ZaNF-YC15	27:50187263...50197935	-	861	286	31.61	5.11	Nucleus
Zardc39205.t1	ZaNF-YC16	28:24116426...24118518	-	855	284	31.23	5.59	Nucleus
Zardc39938.t1	ZaNF-YC17	29:13515655...13517989	+	630	209	23.86	6.04	Nucleus
Zardc08780.t1	ZaNF-YC2	5:62074696...62078667	+	879	292	32.85	7.56	Cytoplasmic
Zardc09012.t1	ZaNF-YC3	5:71415997...71416987	-	285	94	10.35	8.74	Cytoplasmic
Zardc09836.t1	ZaNF-YC4	6:23460361...23463690	+	690	229	25.92	6.86	Cytoplasmic
Zardc12609.t1	ZaNF-YC5	8:5358767...5360889	+	906	301	33.5	8.71	Nucleus
Zardc16762.t1	ZaNF-YC6	11:14768503...14769656	+	792	263	28.87	7.44	Cytoplasmic
Zardc19055.t1	ZaNF-YC7	13:258762...260777	-	699	232	27.32	5.82	Nucleus
Zardc19108.t1	ZaNF-YC8	13:952107...954176	+	753	250	29.56	5.66	Nucleus
Zardc32870.t1	ZaNF-YC9	23:9587300...9588159	-	774	257	28.79	6.33	Nucleus

## Sheet: Arabidopsis
ID	Name
AT5G12840	AtNF-YA1
AT3G05690	AtNF-YA2
AT1G72830	AtNF-YA3
AT2G34720	AtNF-YA4
AT1G54160	AtNF-YA5
AT3G14020	AtNF-YA6
AT1G30500	AtNF-YA7
AT1G17590	AtNF-YA8
AT3G20910	AtNF-YA9
AT5G06510	AtNF-YA10
AT2G38880	AtNF-YB1
AT5G47640	AtNF-YB2
AT4G14540	AtNF-YB3
AT1G09030	AtNF-YB4
AT2G47810	AtNF-YB5
AT5G47670	AtNF-YB6
AT2G13570	AtNF-YB7
AT2G37060	AtNF-YB8
AT1G21970	AtNF-YB9
AT3G53340	AtNF-YB10
AT2G27470	AtNF-YB11
AT5G08190	AtNF-YB12
AT5G23090	AtNF-YB13
AT3G48590	AtNF-YC1
AT1G56170	AtNF-YC2
AT1G54830	AtNF-YC3
AT5G63470	AtNF-YC4
AT5G50490	AtNF-YC5
AT5G50480	AtNF-YC6
AT5G50470	AtNF-YC7
AT5G27910	AtNF-YC8
AT1G08970	AtNF-YC9
AT1G07980	AtNF-YC10
AT3G12480	AtNF-YC11
AT5G38140	AtNF-YC12
AT5G43250	AtNF-YC13

## Sheet: rice
ID	Name
LOC_Os03g07880	OsNF-YA1
LOC_Os03g29760	OsNF-YA2
LOC_Os03g44540	OsNF-YA3
LOC_Os03g48970	OsNF-YA4
LOC_Os07g06470	OsNF-YA5
LOC_Os07g41720	OsNF-YA6
LOC_Os08g09690	OsNF-YA7
LOC_Os10g25850	OsNF-YA8
LOC_Os12g41880	OsNF-YA9
LOC_Os12g42400	OsNF-YA10
LOC_Os02g53620	OsNF-YA11
LOC_Os02g49410	OsNF-YB1
LOC_Os01g61810	OsNF-YB2
LOC_Os05g38820	OsNF-YB3
LOC_Os05g49780	OsNF-YB4
LOC_Os01g70880	OsNF-YB5
LOC_Os01g70890	OsNF-YB6
LOC_Os02g49370	OsNF-YB7
LOC_Os03g29970	OsNF-YB8
LOC_Os06g17480	OsNF-YB9
LOC_Os07g41580	OsNF-YB10
LOC_Os08g07740	OsNF-YB11
LOC_Os02g07450	OsNF-YC1
LOC_Os03g14669	OsNF-YC2
LOC_Os04g58680	OsNF-YC3
LOC_Os06g45640	OsNF-YC4
LOC_Os08g10560	OsNF-YC5
LOC_Os08g38780	OsNF-YC6
LOC_Os09g30310	OsNF-YC7
LOC_Os01g39850	OsNF-YC8
LOC_Os01g01290	OsNF-YC9
LOC_Os01g24460	OsNF-YC10
LOC_Os10g11580	OsNF-YC11
LOC_Os05g23910	OsNF-YC12

## Sheet: Citrus grandis
ID	Name
Cg1g010210	CgNF-YA1
Cg2g003570	CgNF-YA2
Cg2g039280	CgNF-YA3
Cg6g013980	CgNF-YA4
Cg7g023360	CgNF-YA5
Cg9g021740	CgNF-YA6
Cg1g022920	CgNF-YB1
Cg1g028020	CgNF-YB2
Cg2g020300	CgNF-YB3
Cg2g031390	CgNF-YB4
Cg2g046500	CgNF-YB5
Cg4g013650	CgNF-YB6
Cg4g013710	CgNF-YB7
Cg5g036900	CgNF-YB8
Cg6g002780	CgNF-YB9
Cg7g005970	CgNF-YB10
Cg8g014010	CgNF-YB11
Cg9g003170	CgNF-YB12
CgUng001920	CgNF-YB13
Cg3g007060	CgNF-YC1
Cg5g002790	CgNF-YC2
Cg6g019150	CgNF-YC3
Cg7g010160	CgNF-YC4
Cg9g029340	CgNF-YC5
